# Supplementary material for: A prognostic nomogram for overall survival in male breast cancer with histology of infiltrating duct carcinoma after surgery
Source: PeerJ. 2019 Oct 14;7:e7837. doi: 10.7717/peerj.7837 (PMC6796958; doi:10.7717/peerj.7837)
Supplement: Data S1 [file peerj-07-7837-s001.xlsx]

## Sheet: raw data
Marital status at diagnosis	Age at diagnosis	Year of diagnosis	Race recode (White, Black, Other)	Primary Site - labeled	Grade	Laterality	Diagnostic Confirmation	Derived AJCC Stage Group, 6th ed (2004+)	Derived AJCC T, 6th ed (2004+)	Derived AJCC N, 6th ed (2004+)	Derived AJCC M, 6th ed (2004+)	Summary stage 2000 (1998+)	RX Summ--Surg Prim Site (1998+)	Reason no cancer-directed surgery	CS tumor size (2004+)	CS extension (2004+)	CS lymph nodes (2004+)	CS mets at dx (2004+)	CS site-specific factor 1 (2004+ varying by schema)	CS site-specific factor 2 (2004+ varying by schema)	CS site-specific factor 3 (2004+ varying by schema)	CS site-specific factor 4 (2004+ varying by schema)	CS site-specific factor 5 (2004+ varying by schema)	CS site-specific factor 6 (2004+ varying by schema)	CS Tumor Size/Ext Eval (2004+)	CS Reg Node Eval (2004+)	CS Mets Eval (2004+)	Regional nodes examined (1988+)	Regional nodes positive (1988+)	ER Status Recode Breast Cancer (1990+)	PR Status Recode Breast Cancer (1990+)	Derived HER2 Recode (2010+)	Breast Subtype (2010+)		SEER cause-specific death classification	SEER other cause of death classification	Survival months	Vital status recode (study cutoff used)	Sequence number	Chemotherapy recode (yes, no/unk)	Radiation recode	Radiation sequence with surgery	SEER registry
Widowed	94	2004	White	C50.1-Central portion of breast	Moderately differentiated; Grade II	Left - origin of primary	Positive histology	IIA	T2	N0	M0	Localized	21	Surgery performed	22	100	0	0	10	10	98	0	0	0	3	0	0	0	98	Positive	Positive	Not 2010+ Breast	Not 2010+ Breast		Alive or dead of other cause	Dead (attributable to causes other than this cancer dx)	53	Dead	One primary only	No/Unknown	None/Unknown	No radiation and/or cancer-directed surgery	Greater Georgia - 2000+
Married (including common law)	94	2005	White	C50.1-Central portion of breast	Moderately differentiated; Grade II	Right - origin of primary	Positive histology	I	T1c	N0	M0	Localized	51	Surgery performed	15	100	0	0	10	10	0	0	0	0	3	3	0	1	0	Positive	Positive	Not 2010+ Breast	Not 2010+ Breast		N/A not first tumor	N/A not first tumor	8	Dead	2nd of 2 or more primaries	No/Unknown	None/Unknown	No radiation and/or cancer-directed surgery	Utah - 1973+
Married (including common law)	96	2006	White	C50.9-Breast, NOS	Moderately differentiated; Grade II	Right - origin of primary	Positive histology	IIA	T1c	N1mi	M0	Regional	51	Surgery performed	18	100	130	0	10	10	1	987	987	0	3	3	0	5	1	Positive	Positive	Not 2010+ Breast	Not 2010+ Breast		Alive or dead of other cause	Dead (attributable to causes other than this cancer dx)	78	Dead	One primary only	No/Unknown	None/Unknown	No radiation and/or cancer-directed surgery	Detroit (Metropolitan) - 1973+
Married (including common law)	94	2006	White	C50.9-Breast, NOS	Poorly differentiated; Grade III	Left - origin of primary	Positive histology	IIA	T2	N0(i+)	M0	Localized	41	Surgery performed	27	100	50	0	10	10	0	987	987	0	3	3	0	2	0	Positive	Positive	Not 2010+ Breast	Not 2010+ Breast		N/A not first tumor	N/A not first tumor	33	Dead	2nd of 2 or more primaries	No/Unknown	None/Unknown	No radiation and/or cancer-directed surgery	Greater Georgia - 2000+
Widowed	94	2006	Black	C50.1-Central portion of breast	Poorly differentiated; Grade III	Left - origin of primary	Positive histology	UNK Stage	T2	NX	M0	Regional	40	Surgery performed	40	200	999	0	10	10	98	987	987	20	3	0	0	0	98	Positive	Positive	Not 2010+ Breast	Not 2010+ Breast		Dead (attributable to this cancer dx)	Alive or dead due to cancer	2	Dead	One primary only	No/Unknown	None/Unknown	No radiation and/or cancer-directed surgery	New Jersey - 2000+
Married (including common law)	93	2004	White	C50.9-Breast, NOS	Moderately differentiated; Grade II	Right - origin of primary	Positive histology	IIA	T2	N0	M0	Regional	40	Surgery performed	30	200	0	0	10	10	98	0	0	0	3	0	0	0	98	Positive	Positive	Not 2010+ Breast	Not 2010+ Breast		N/A not first tumor	N/A not first tumor	3	Dead	2nd of 2 or more primaries	No/Unknown	None/Unknown	No radiation and/or cancer-directed surgery	Louisiana - 2000+
Married (including common law)	92	2004	White	C50.8-Overlapping lesion of breast	Moderately differentiated; Grade II	Right - origin of primary	Positive histology	IIA	T2	N0	M0	Localized	51	Surgery performed	24	100	0	0	997	997	0	0	0	50	3	3	0	9	0	Unknown	Unknown	Not 2010+ Breast	Not 2010+ Breast		Alive or dead of other cause	Dead (attributable to causes other than this cancer dx)	83	Dead	1st of 2 or more primaries	No/Unknown	None/Unknown	No radiation and/or cancer-directed surgery	New Jersey - 2000+
Widowed	97	2010	White	C50.9-Breast, NOS	Moderately differentiated; Grade II	Left - origin of primary	Positive histology	IIA	T2	N0	M0	Localized	22	Surgery performed	22	100	0	0	10	10	98	0	0	0	3	0	0	0	98	Positive	Positive	Negative	Her2-/HR+		Alive or dead of other cause	Dead (attributable to causes other than this cancer dx)	6	Dead	One primary only	No/Unknown	None/Unknown	No radiation and/or cancer-directed surgery	Seattle (Puget Sound) - 1974+
Widowed	91	2004	White	C50.9-Breast, NOS	Poorly differentiated; Grade III	Right - origin of primary	Positive histology	IIIA	T3	N1NOS	M0	Regional	41	Surgery performed	60	200	250	0	10	10	97	987	987	0	3	3	0	97	97	Positive	Positive	Not 2010+ Breast	Not 2010+ Breast		Alive or dead of other cause	Dead (attributable to causes other than this cancer dx)	1	Dead	One primary only	No/Unknown	None/Unknown	No radiation and/or cancer-directed surgery	California excluding SF/SJM/LA - 2000+
Married (including common law)	92	2005	White	C50.0-Nipple	Poorly differentiated; Grade III	Left - origin of primary	Positive histology	IIIB	T4b	N0	M0	Regional	41	Surgery performed	15	510	0	0	10	10	0	0	0	30	Blank(s)	Blank(s)	Blank(s)	1	0	Positive	Positive	Not 2010+ Breast	Not 2010+ Breast		Alive or dead of other cause	Dead (attributable to causes other than this cancer dx)	54	Dead	One primary only	No/Unknown	None/Unknown	No radiation and/or cancer-directed surgery	Iowa - 1973+
Widowed	93	2005	Black	C50.9-Breast, NOS	Moderately differentiated; Grade II	Left - origin of primary	Positive histology	IIA	T2	N0	M0	Localized	41	Surgery performed	32	100	0	0	10	20	0	0	0	0	3	3	0	3	0	Positive	Negative	Not 2010+ Breast	Not 2010+ Breast		Dead (attributable to this cancer dx)	Alive or dead due to cancer	47	Dead	One primary only	Yes	Beam radiation	Radiation after surgery	Greater Georgia - 2000+
Widowed	94	2006	White	C50.1-Central portion of breast	Well differentiated; Grade I	Left - origin of primary	Positive histology	IIA	T2	N0	M0	Localized	41	Surgery performed	27	100	0	0	10	10	98	0	0	20	3	0	0	0	98	Positive	Positive	Not 2010+ Breast	Not 2010+ Breast		Alive or dead of other cause	Dead (attributable to causes other than this cancer dx)	16	Dead	One primary only	No/Unknown	None/Unknown	No radiation and/or cancer-directed surgery	California excluding SF/SJM/LA - 2000+
Married (including common law)	93	2005	White	C50.4-Upper-outer quadrant of breast	Poorly differentiated; Grade III	Right - origin of primary	Positive histology	IIB	T3	N0	M0	Localized	22	Surgery performed	120	100	0	0	10	10	98	0	0	0	3	0	0	0	98	Positive	Positive	Not 2010+ Breast	Not 2010+ Breast		N/A not first tumor	N/A not first tumor	15	Dead	2nd of 2 or more primaries	No/Unknown	Beam radiation	Radiation after surgery	New Jersey - 2000+
Widowed	92	2004	White	C50.1-Central portion of breast	Poorly differentiated; Grade III	Left - origin of primary	Positive histology	IIIB	T4b	N1a	M0	Regional	51	Surgery performed	30	510	250	0	10	10	1	987	987	30	3	3	0	25	1	Positive	Positive	Not 2010+ Breast	Not 2010+ Breast		Alive or dead of other cause	Dead (attributable to causes other than this cancer dx)	60	Dead	One primary only	No/Unknown	Beam radiation	Radiation after surgery	New Jersey - 2000+
Widowed	91	2005	White	C50.1-Central portion of breast	Moderately differentiated; Grade II	Left - origin of primary	Positive histology	IIA	T2	N0	M0	Regional	51	Surgery performed	32	200	0	0	10	10	0	0	0	0	3	3	0	3	0	Positive	Positive	Not 2010+ Breast	Not 2010+ Breast		N/A not first tumor	N/A not first tumor	13	Dead	2nd of 2 or more primaries	No/Unknown	None/Unknown	No radiation and/or cancer-directed surgery	New Jersey - 2000+
Widowed	91	2005	White	C50.8-Overlapping lesion of breast	Poorly differentiated; Grade III	Left - origin of primary	Positive histology	IIIB	T4c	N0	M0	Regional	40	Surgery performed	35	610	0	0	10	10	98	0	0	0	3	0	0	0	98	Positive	Positive	Not 2010+ Breast	Not 2010+ Breast		Alive or dead of other cause	Dead (attributable to causes other than this cancer dx)	51	Dead	One primary only	No/Unknown	None/Unknown	No radiation and/or cancer-directed surgery	Los Angeles - 1992+
Widowed	91	2004	White	C50.9-Breast, NOS	Moderately differentiated; Grade II	Right - origin of primary	Positive histology	IIA	T2	N0	M0	Regional	40	Surgery performed	27	200	0	0	10	10	98	0	0	0	3	3	0	3	0	Positive	Positive	Not 2010+ Breast	Not 2010+ Breast		Alive or dead of other cause	Dead (attributable to causes other than this cancer dx)	86	Dead	One primary only	No/Unknown	None/Unknown	No radiation and/or cancer-directed surgery	New Mexico - 1973+
Widowed	95	2008	White	C50.0-Nipple	Poorly differentiated; Grade III	Right - origin of primary	Positive histology	IIIB	T4b	N0	M0	Regional	40	Surgery performed	40	510	0	0	10	10	98	0	0	20	3	0	0	0	98	Positive	Positive	Not 2010+ Breast	Not 2010+ Breast		N/A not first tumor	N/A not first tumor	12	Dead	2nd of 2 or more primaries	No/Unknown	None/Unknown	No radiation and/or cancer-directed surgery	Connecticut - 1973+
Married (including common law)	89	2004	White	C50.9-Breast, NOS	Poorly differentiated; Grade III	Right - origin of primary	Positive histology	IIA	T2	N0(mol+)	M0	Regional	41	Surgery performed	27	200	0	0	10	10	0	1	2	0	3	3	0	1	0	Positive	Positive	Not 2010+ Breast	Not 2010+ Breast		Alive or dead of other cause	Dead (attributable to causes other than this cancer dx)	3	Dead	One primary only	No/Unknown	None/Unknown	No radiation and/or cancer-directed surgery	California excluding SF/SJM/LA - 2000+
Married (including common law)	94	2009	White	C50.9-Breast, NOS	Well differentiated; Grade I	Right - origin of primary	Positive histology	UNK Stage	TX	N0	M0	Localized	0	Not recommended	999	100	0	0	10	10	98	0	0	0	1	0	0	0	98	Positive	Positive	Not 2010+ Breast	Not 2010+ Breast		Alive or dead of other cause	Alive or dead due to cancer	67	Alive	One primary only	No/Unknown	None/Unknown	No radiation and/or cancer-directed surgery	New Jersey - 2000+
Widowed	89	2004	White	C50.1-Central portion of breast	Poorly differentiated; Grade III	Left - origin of primary	Positive histology	IIIB	T4b	N0	M0	Regional	51	Surgery performed	21	510	0	0	10	10	0	0	0	0	3	3	0	13	0	Positive	Positive	Not 2010+ Breast	Not 2010+ Breast		N/A not first tumor	N/A not first tumor	21	Dead	2nd of 2 or more primaries	No/Unknown	None/Unknown	No radiation and/or cancer-directed surgery	California excluding SF/SJM/LA - 2000+
Widowed	89	2004	White	C50.8-Overlapping lesion of breast	Poorly differentiated; Grade III	Left - origin of primary	Positive histology	IIA	T2	N0	M0	Localized	41	Surgery performed	23	100	0	0	10	10	98	0	0	30	3	0	0	0	98	Positive	Positive	Not 2010+ Breast	Not 2010+ Breast		Alive or dead of other cause	Dead (attributable to causes other than this cancer dx)	63	Dead	1st of 2 or more primaries	No/Unknown	None/Unknown	No radiation and/or cancer-directed surgery	San Francisco-Oakland SMSA - 1973+
Married (including common law)	94	2008	White	C50.1-Central portion of breast	Moderately differentiated; Grade II	Left - origin of primary	Positive histology	I	T1c	N0	M0	Localized	0	Not recommended, contraindicated due to other cond; autopsy only (1973-2002)	15	100	0	0	10	10	98	0	0	0	1	0	0	0	98	Positive	Positive	Not 2010+ Breast	Not 2010+ Breast		Alive or dead of other cause	Alive or dead due to cancer	32	Alive	One primary only	No/Unknown	None/Unknown	No radiation and/or cancer-directed surgery	Los Angeles - 1992+
Widowed	95	2009	White	C50.8-Overlapping lesion of breast	Poorly differentiated; Grade III	Right - origin of primary	Positive histology	I	T1c	N0	M0	Localized	0	Recommended, unknown if performed	15	100	0	0	10	10	98	0	0	987	1	0	0	99	99	Positive	Positive	Not 2010+ Breast	Not 2010+ Breast		Alive or dead of other cause	Dead (attributable to causes other than this cancer dx)	43	Dead	One primary only	No/Unknown	None/Unknown	No radiation and/or cancer-directed surgery	Atlanta (Metropolitan) - 1975+
Widowed	88	2004	White	C50.1-Central portion of breast	Well differentiated; Grade I	Right - origin of primary	Positive histology	IIA	T1b	N1mi	M0	Regional	41	Surgery performed	10	100	150	0	998	998	1	987	987	0	3	3	0	1	1	Unknown	Unknown	Not 2010+ Breast	Not 2010+ Breast		N/A not first tumor	N/A not first tumor	17	Dead	2nd of 2 or more primaries	No/Unknown	None/Unknown	No radiation and/or cancer-directed surgery	California excluding SF/SJM/LA - 2000+
Married (including common law)	90	2006	White	C50.9-Breast, NOS	Unknown	Left - origin of primary	Positive histology	UNK Stage	TX	NX	MX	Unknown/unstaged	0	Not recommended	999	999	999	99	999	999	99	987	987	987	9	9	9	99	99	Unknown	Unknown	Not 2010+ Breast	Not 2010+ Breast		Alive or dead of other cause	Dead (attributable to causes other than this cancer dx)	39	Dead	One primary only	No/Unknown	None/Unknown	No radiation and/or cancer-directed surgery	Connecticut - 1973+
Married (including common law)	92	2008	White	C50.8-Overlapping lesion of breast	Well differentiated; Grade I	Left - origin of primary	Positive histology	I	T1c	N0	M0	Localized	0	Not recommended	13	100	0	0	10	10	98	0	0	50	1	0	9	0	98	Positive	Positive	Not 2010+ Breast	Not 2010+ Breast		N/A not first tumor	N/A not first tumor	37	Dead	2nd of 2 or more primaries	No/Unknown	None/Unknown	No radiation and/or cancer-directed surgery	Greater Georgia - 2000+
Widowed	90	2005	White	C50.1-Central portion of breast	Moderately differentiated; Grade II	Left - origin of primary	Positive histology	I	T1c	N0	M0	Localized	41	Surgery performed	12	100	0	0	10	10	98	0	0	0	3	0	0	0	98	Positive	Positive	Not 2010+ Breast	Not 2010+ Breast		N/A not first tumor	N/A not first tumor	96	Dead	2nd of 2 or more primaries	No/Unknown	None/Unknown	No radiation and/or cancer-directed surgery	New Jersey - 2000+
Unknown	90	2006	Unknown	C50.1-Central portion of breast	Moderately differentiated; Grade II	Right - origin of primary	Positive histology	UNK Stage	TX	NX	MX	Unknown/unstaged	0	Not recommended	999	999	999	99	10	10	98	987	987	0	1	9	9	0	98	Positive	Positive	Not 2010+ Breast	Not 2010+ Breast		Alive or dead of other cause	Dead (attributable to causes other than this cancer dx)	11	Dead	One primary only	No/Unknown	None/Unknown	No radiation and/or cancer-directed surgery	Los Angeles - 1992+
Married (including common law)	90	2006	White	C50.1-Central portion of breast	Moderately differentiated; Grade II	Left - origin of primary	Positive histology	IV	TX	N0	M1	Distant	0	Not recommended	999	100	0	40	10	10	98	0	0	0	1	0	0	0	98	Positive	Positive	Not 2010+ Breast	Not 2010+ Breast		Dead (attributable to this cancer dx)	Alive or dead due to cancer	28	Dead	One primary only	No/Unknown	None/Unknown	No radiation and/or cancer-directed surgery	California excluding SF/SJM/LA - 2000+
Widowed	89	2004	White	C50.1-Central portion of breast	Unknown	Left - origin of primary	Positive histology	I	T1c	N0	M0	Localized	0	Recommended but not performed, unknown reason	20	100	0	0	999	999	98	0	0	0	0	0	0	0	98	Unknown	Unknown	Not 2010+ Breast	Not 2010+ Breast		Alive or dead of other cause	Dead (attributable to causes other than this cancer dx)	36	Dead	One primary only	No/Unknown	None/Unknown	No radiation and/or cancer-directed surgery	New Jersey - 2000+
Married (including common law)	88	2004	White	C50.0-Nipple	Moderately differentiated; Grade II	Right - origin of primary	Positive histology	IIB	T2	N1NOS	M0	Regional	51	Surgery performed	22	100	250	0	20	20	0	987	987	20	3	3	0	7	1	Negative	Negative	Not 2010+ Breast	Not 2010+ Breast		Alive or dead of other cause	Dead (attributable to causes other than this cancer dx)	11	Dead	One primary only	No/Unknown	None/Unknown	No radiation and/or cancer-directed surgery	Utah - 1973+
Married (including common law)	89	2004	White	C50.8-Overlapping lesion of breast	Moderately differentiated; Grade II	Right - origin of primary	Positive histology	I	T1b	N0	M0	Localized	51	Surgery performed	10	100	0	0	999	999	0	0	0	0	Blank(s)	Blank(s)	Blank(s)	13	0	Unknown	Unknown	Not 2010+ Breast	Not 2010+ Breast		Alive or dead of other cause	Dead (attributable to causes other than this cancer dx)	84	Dead	1st of 2 or more primaries	No/Unknown	None/Unknown	No radiation and/or cancer-directed surgery	Iowa - 1973+
Widowed	89	2004	White	C50.9-Breast, NOS	Moderately differentiated; Grade II	Right - origin of primary	Positive histology	UNK Stage	T2	NX	MX	Localized	40	Surgery performed	38	100	999	99	10	10	98	987	987	0	3	0	0	0	98	Positive	Positive	Not 2010+ Breast	Not 2010+ Breast		Alive or dead of other cause	Dead (attributable to causes other than this cancer dx)	89	Dead	One primary only	No/Unknown	None/Unknown	No radiation and/or cancer-directed surgery	New Jersey - 2000+
Married (including common law)	89	2005	White	C50.9-Breast, NOS	Moderately differentiated; Grade II	Right - origin of primary	Positive histology	IIB	T3	N0	M0	Localized	51	Surgery performed	60	100	0	0	10	10	0	0	0	30	3	3	0	13	0	Positive	Positive	Not 2010+ Breast	Not 2010+ Breast		Alive or dead of other cause	Alive or dead due to cancer	112	Alive	One primary only	No/Unknown	Beam radiation	Radiation after surgery	New Mexico - 1973+
Married (including common law)	93	2009	White	C50.1-Central portion of breast	Moderately differentiated; Grade II	Left - origin of primary	Positive histology	UNK Stage	T3	N1a	MX	Regional	51	Surgery performed	52	200	250	99	10	10	3	987	987	0	3	3	9	23	3	Positive	Positive	Not 2010+ Breast	Not 2010+ Breast		N/A not first tumor	N/A not first tumor	8	Dead	3rd of 3 or more primaries	No/Unknown	None/Unknown	No radiation and/or cancer-directed surgery	California excluding SF/SJM/LA - 2000+
Widowed	98	2013	White	C50.0-Nipple	Unknown	Left - origin of primary	Positive histology	UNK Stage	TX	NX	MX	Unknown/unstaged	0	Not recommended	999	999	999	99	10	10	98	987	987	0	1	9	9	0	98	Positive	Positive	Negative	Her2-/HR+		N/A not first tumor	N/A not first tumor	14	Alive	2nd of 2 or more primaries	No/Unknown	None/Unknown	No radiation and/or cancer-directed surgery	California excluding SF/SJM/LA - 2000+
Widowed	94	2010	White	C50.9-Breast, NOS	Moderately differentiated; Grade II	Left - origin of primary	Positive histology	I	T1c	N0	M0	Localized	23	Surgery performed	15	100	0	0	10	10	98	0	0	20	3	0	0	0	98	Positive	Positive	Negative	Her2-/HR+		Alive or dead of other cause	Dead (attributable to causes other than this cancer dx)	16	Dead	One primary only	No/Unknown	None/Unknown	No radiation and/or cancer-directed surgery	Los Angeles - 1992+
Married (including common law)	89	2004	White	C50.4-Upper-outer quadrant of breast	Moderately differentiated; Grade II	Right - origin of primary	Positive histology	I	T1c	N0	M0	Localized	41	Surgery performed	12	100	0	0	10	20	98	0	0	30	3	0	0	0	98	Positive	Negative	Not 2010+ Breast	Not 2010+ Breast		Alive or dead of other cause	Dead (attributable to causes other than this cancer dx)	63	Dead	One primary only	No/Unknown	None/Unknown	No radiation and/or cancer-directed surgery	San Francisco-Oakland SMSA - 1973+
Widowed	97	2012	White	C50.1-Central portion of breast	Moderately differentiated; Grade II	Right - origin of primary	Positive histology	IIA	T2	N0	M0	Localized	51	Surgery performed	25	100	0	0	10	10	0	0	0	0	3	3	0	11	0	Positive	Positive	Negative	Her2-/HR+		N/A not first tumor	N/A not first tumor	24	Alive	2nd of 2 or more primaries	No/Unknown	None/Unknown	No radiation and/or cancer-directed surgery	Greater Georgia - 2000+
Married (including common law)	89	2006	White	C50.1-Central portion of breast	Moderately differentiated; Grade II	Right - origin of primary	Positive histology	I	T1c	N0	M0	Localized	41	Surgery performed	17	100	0	0	10	10	98	0	0	0	3	0	0	0	98	Positive	Positive	Not 2010+ Breast	Not 2010+ Breast		N/A not first tumor	N/A not first tumor	14	Dead	2nd of 2 or more primaries	No/Unknown	None/Unknown	No radiation and/or cancer-directed surgery	California excluding SF/SJM/LA - 2000+
Unknown	90	2007	White	C50.8-Overlapping lesion of breast	Moderately differentiated; Grade II	Left - origin of primary	Positive histology	UNK Stage	T2	N1a	MX	Regional	22	Surgery performed	22	100	250	99	10	10	1	987	987	0	3	3	9	5	1	Positive	Positive	Not 2010+ Breast	Not 2010+ Breast		N/A not first tumor	N/A not first tumor	47	Dead	3rd of 3 or more primaries	No/Unknown	None/Unknown	No radiation and/or cancer-directed surgery	New Jersey - 2000+
Married (including common law)	93	2010	White	C50.9-Breast, NOS	Moderately differentiated; Grade II	Left - origin of primary	Positive histology	IIB	T2	N1a	M0	Regional	80	Surgery performed	22	100	260	0	997	997	1	987	987	30	3	3	0	16	1	Unknown	Unknown	Unknown	Unknown		Alive or dead of other cause	Alive or dead due to cancer	53	Alive	One primary only	No/Unknown	None/Unknown	No radiation and/or cancer-directed surgery	California excluding SF/SJM/LA - 2000+
Unknown	88	2005	White	C50.9-Breast, NOS	Moderately differentiated; Grade II	Right - origin of primary	Positive histology	UNK Stage	TX	NX	MX	Unknown/unstaged	0	Recommended but not performed, unknown reason	33	999	999	99	10	10	98	987	987	50	9	9	9	0	98	Positive	Positive	Not 2010+ Breast	Not 2010+ Breast		Alive or dead of other cause	Dead (attributable to causes other than this cancer dx)	19	Dead	One primary only	No/Unknown	None/Unknown	No radiation and/or cancer-directed surgery	New Jersey - 2000+
Married (including common law)	88	2004	White	C50.9-Breast, NOS	Poorly differentiated; Grade III	Left - origin of primary	Positive histology	I	T1c	N0	M0	Localized	22	Surgery performed	20	100	0	0	997	997	98	0	0	0	3	0	0	0	98	Unknown	Unknown	Not 2010+ Breast	Not 2010+ Breast		Alive or dead of other cause	Dead (attributable to causes other than this cancer dx)	13	Dead	One primary only	No/Unknown	None/Unknown	No radiation and/or cancer-directed surgery	New Jersey - 2000+
Widowed	90	2006	White	C50.1-Central portion of breast	Well differentiated; Grade I	Left - origin of primary	Positive histology	I	T1b	N0	M0	Localized	40	Surgery performed	9	100	0	0	10	10	98	0	0	30	3	0	0	0	98	Positive	Positive	Not 2010+ Breast	Not 2010+ Breast		N/A not first tumor	N/A not first tumor	50	Dead	2nd of 2 or more primaries	No/Unknown	None/Unknown	No radiation and/or cancer-directed surgery	California excluding SF/SJM/LA - 2000+
Widowed	95	2011	White	C50.8-Overlapping lesion of breast	Poorly differentiated; Grade III	Right - origin of primary	Positive histology	I	T1c	N0	M0	Localized	41	Surgery performed	20	100	0	0	10	10	98	0	0	20	3	0	1	0	98	Positive	Positive	Negative	Her2-/HR+		Alive or dead of other cause	Alive or dead due to cancer	38	Alive	One primary only	No/Unknown	Refused	No radiation and/or cancer-directed surgery	California excluding SF/SJM/LA - 2000+
Married (including common law)	92	2008	White	C50.1-Central portion of breast	Poorly differentiated; Grade III	Right - origin of primary	Positive histology	IIB	T2	N1a	M0	Regional	40	Surgery performed	27	200	250	0	10	10	1	987	987	0	3	3	0	9	1	Positive	Positive	Not 2010+ Breast	Not 2010+ Breast		Alive or dead of other cause	Dead (attributable to causes other than this cancer dx)	8	Dead	1st of 2 or more primaries	No/Unknown	None/Unknown	No radiation and/or cancer-directed surgery	Connecticut - 1973+
Married (including common law)	89	2005	White	C50.9-Breast, NOS	Moderately differentiated; Grade II	Right - origin of primary	Positive histology	IIA	T2	N0	M0	Localized	51	Surgery performed	30	100	0	0	10	10	0	0	0	0	Blank(s)	Blank(s)	Blank(s)	4	0	Positive	Positive	Not 2010+ Breast	Not 2010+ Breast		N/A not first tumor	N/A not first tumor	29	Dead	2nd of 2 or more primaries	No/Unknown	None/Unknown	No radiation and/or cancer-directed surgery	Iowa - 1973+
Widowed	89	2005	White	C50.0-Nipple	Undifferentiated; anaplastic; Grade IV	Left - origin of primary	Positive histology	I	T1c	N0	M0	Regional	41	Surgery performed	15	200	0	0	10	10	98	0	0	20	3	0	0	0	98	Positive	Positive	Not 2010+ Breast	Not 2010+ Breast		Dead (attributable to this cancer dx)	Alive or dead due to cancer	73	Dead	One primary only	No/Unknown	None/Unknown	No radiation and/or cancer-directed surgery	San Francisco-Oakland SMSA - 1973+
Widowed	89	2005	White	C50.1-Central portion of breast	Poorly differentiated; Grade III	Right - origin of primary	Positive histology	IIB	T2	N1a	M0	Regional	22	Surgery performed	25	100	260	0	10	10	3	987	987	0	3	3	0	4	3	Positive	Positive	Not 2010+ Breast	Not 2010+ Breast		N/A not first tumor	N/A not first tumor	61	Dead	2nd of 2 or more primaries	No/Unknown	Beam radiation	Radiation after surgery	New Jersey - 2000+
Widowed	89	2007	White	C50.1-Central portion of breast	Unknown	Left - origin of primary	Positive histology	IIA	T2	N0	M0	Localized	80	Surgery performed	34	100	0	0	998	998	98	0	0	30	3	0	0	0	98	Unknown	Unknown	Not 2010+ Breast	Not 2010+ Breast		Alive or dead of other cause	Dead (attributable to causes other than this cancer dx)	48	Dead	One primary only	No/Unknown	None/Unknown	No radiation and/or cancer-directed surgery	California excluding SF/SJM/LA - 2000+
Widowed	90	2008	White	C50.0-Nipple	Poorly differentiated; Grade III	Right - origin of primary	Positive histology	UNK Stage	T2	NX	M0	Regional	22	Surgery performed	28	200	999	0	10	10	98	987	987	0	3	0	0	0	98	Positive	Positive	Not 2010+ Breast	Not 2010+ Breast		Alive or dead of other cause	Dead (attributable to causes other than this cancer dx)	2	Dead	One primary only	No/Unknown	None/Unknown	No radiation and/or cancer-directed surgery	California excluding SF/SJM/LA - 2000+
Married (including common law)	87	2004	White	C50.9-Breast, NOS	Poorly differentiated; Grade III	Right - origin of primary	Positive histology	UNK Stage	T4b	N1a	MX	Regional	51	Surgery performed	25	510	600	99	10	10	3	987	987	0	3	3	9	12	3	Positive	Positive	Not 2010+ Breast	Not 2010+ Breast		Alive or dead of other cause	Dead (attributable to causes other than this cancer dx)	99	Dead	One primary only	No/Unknown	None/Unknown	No radiation and/or cancer-directed surgery	California excluding SF/SJM/LA - 2000+
Single (never married)	88	2006	Black	C50.4-Upper-outer quadrant of breast	Moderately differentiated; Grade II	Left - origin of primary	Positive histology	IIB	T2	N1a	M0	Regional	51	Surgery performed	25	100	260	0	10	10	1	987	987	0	3	3	0	9	1	Positive	Positive	Not 2010+ Breast	Not 2010+ Breast		N/A not first tumor	N/A not first tumor	46	Dead	2nd of 2 or more primaries	No/Unknown	None/Unknown	No radiation and/or cancer-directed surgery	Los Angeles - 1992+
Divorced	86	2004	White	C50.1-Central portion of breast	Poorly differentiated; Grade III	Left - origin of primary	Positive histology	IIB	T2	N1a	M0	Regional	41	Surgery performed	25	100	250	0	10	10	1	987	987	50	Blank(s)	Blank(s)	Blank(s)	2	1	Positive	Positive	Not 2010+ Breast	Not 2010+ Breast		N/A not first tumor	N/A not first tumor	46	Dead	2nd of 2 or more primaries	No/Unknown	Beam radiation	Radiation after surgery	Seattle (Puget Sound) - 1974+
Widowed	89	2006	White	C50.0-Nipple	Moderately differentiated; Grade II	Right - origin of primary	Positive histology	I	T1b	N0	M0	Localized	41	Surgery performed	8	100	0	0	10	10	98	0	0	20	3	0	0	0	98	Positive	Positive	Not 2010+ Breast	Not 2010+ Breast		Alive or dead of other cause	Dead (attributable to causes other than this cancer dx)	16	Dead	One primary only	No/Unknown	None/Unknown	No radiation and/or cancer-directed surgery	San Francisco-Oakland SMSA - 1973+
Married (including common law)	87	2005	White	C50.9-Breast, NOS	Moderately differentiated; Grade II	Left - origin of primary	Positive histology	UNK Stage	T3	NX	MX	Regional	0	Not recommended	100	200	999	99	10	10	98	987	987	0	1	0	0	0	98	Positive	Positive	Not 2010+ Breast	Not 2010+ Breast		Dead (attributable to this cancer dx)	Alive or dead due to cancer	4	Dead	One primary only	Yes	None/Unknown	No radiation and/or cancer-directed surgery	Kentucky - 2000+
Married (including common law)	87	2005	White	C50.5-Lower-outer quadrant of breast	Poorly differentiated; Grade III	Right - origin of primary	Positive histology	IIA	T2	N0	M0	Regional	51	Surgery performed	40	200	0	0	10	20	0	0	0	0	3	3	0	5	0	Positive	Negative	Not 2010+ Breast	Not 2010+ Breast		Alive or dead of other cause	Dead (attributable to causes other than this cancer dx)	57	Dead	One primary only	No/Unknown	None/Unknown	No radiation and/or cancer-directed surgery	California excluding SF/SJM/LA - 2000+
Married (including common law)	93	2011	White	C50.1-Central portion of breast	Moderately differentiated; Grade II	Left - origin of primary	Positive histology	IIIB	T4b	N1a	M0	Regional	41	Surgery performed	53	512	250	0	10	20	3	987	987	30	3	3	0	3	3	Positive	Negative	Negative	Her2-/HR+		N/A not first tumor	N/A not first tumor	16	Dead	2nd of 2 or more primaries	No/Unknown	Recommended, unknown if administered	No radiation and/or cancer-directed surgery	Los Angeles - 1992+
Married (including common law)	95	2013	White	C50.8-Overlapping lesion of breast	Poorly differentiated; Grade III	Left - origin of primary	Positive histology	I	T1c	N0	M0	Localized	41	Surgery performed	15	100	0	0	10	10	0	0	0	20	3	3	0	1	0	Positive	Positive	Negative	Her2-/HR+		Alive or dead of other cause	Alive or dead due to cancer	20	Alive	One primary only	No/Unknown	Refused	No radiation and/or cancer-directed surgery	California excluding SF/SJM/LA - 2000+
Widowed	89	2007	White	C50.1-Central portion of breast	Moderately differentiated; Grade II	Left - origin of primary	Positive histology	IIA	T2	N0	M0	Localized	41	Surgery performed	26	100	0	0	10	10	98	0	0	0	3	0	0	0	98	Positive	Positive	Not 2010+ Breast	Not 2010+ Breast		Alive or dead of other cause	Dead (attributable to causes other than this cancer dx)	42	Dead	One primary only	No/Unknown	None/Unknown	No radiation and/or cancer-directed surgery	California excluding SF/SJM/LA - 2000+
Married (including common law)	88	2006	White	C50.1-Central portion of breast	Poorly differentiated; Grade III	Right - origin of primary	Positive histology	IV	T2	NX	M1	Distant	0	Not recommended	35	100	999	50	10	10	98	987	987	0	1	0	1	0	98	Positive	Positive	Not 2010+ Breast	Not 2010+ Breast		Dead (attributable to this cancer dx)	Alive or dead due to cancer	2	Dead	One primary only	No/Unknown	Refused	No radiation and/or cancer-directed surgery	California excluding SF/SJM/LA - 2000+
Married (including common law)	90	2008	White	C50.9-Breast, NOS	Moderately differentiated; Grade II	Right - origin of primary	Positive histology	IIIA	T2	N2NOS	M0	Regional	51	Surgery performed	42	200	620	0	10	10	8	987	987	0	3	3	0	30	8	Positive	Positive	Not 2010+ Breast	Not 2010+ Breast		Alive or dead of other cause	Alive or dead due to cancer	79	Alive	One primary only	No/Unknown	Beam radiation	Radiation after surgery	Iowa - 1973+
Married (including common law)	89	2006	White	C50.1-Central portion of breast	Moderately differentiated; Grade II	Right - origin of primary	Positive histology	I	T1c	N0	M0	Localized	40	Surgery performed	18	100	0	0	10	20	98	0	0	0	3	0	0	0	98	Positive	Negative	Not 2010+ Breast	Not 2010+ Breast		Alive or dead of other cause	Dead (attributable to causes other than this cancer dx)	16	Dead	1st of 2 or more primaries	No/Unknown	None/Unknown	No radiation and/or cancer-directed surgery	Greater Georgia - 2000+
Married (including common law)	92	2010	White	C50.9-Breast, NOS	Poorly differentiated; Grade III	Right - origin of primary	Positive histology	IIA	T2	N0	M0	Regional	40	Surgery performed	25	200	0	0	10	10	98	0	0	20	3	0	0	0	98	Positive	Positive	Negative	Her2-/HR+		Alive or dead of other cause	Dead (attributable to causes other than this cancer dx)	21	Dead	One primary only	No/Unknown	None/Unknown	No radiation and/or cancer-directed surgery	New Jersey - 2000+
Married (including common law)	91	2009	White	C50.1-Central portion of breast	Well differentiated; Grade I	Left - origin of primary	Positive histology	I	T1b	N0	M0	Localized	41	Surgery performed	7	100	0	0	10	10	98	0	0	50	3	0	0	0	98	Positive	Positive	Not 2010+ Breast	Not 2010+ Breast		N/A not first tumor	N/A not first tumor	67	Alive	2nd of 2 or more primaries	No/Unknown	None/Unknown	No radiation and/or cancer-directed surgery	Greater Georgia - 2000+
Married (including common law)	87	2004	White	C50.4-Upper-outer quadrant of breast	Moderately differentiated; Grade II	Right - origin of primary	Positive histology	I	T1a	N0(i-)	M0	Localized	40	Surgery performed	4	100	0	0	10	10	0	1	0	20	3	3	0	4	0	Positive	Positive	Not 2010+ Breast	Not 2010+ Breast		N/A not first tumor	N/A not first tumor	82	Dead	2nd of 2 or more primaries	No/Unknown	None/Unknown	No radiation and/or cancer-directed surgery	California excluding SF/SJM/LA - 2000+
Widowed	90	2008	Other (American Indian/AK Native, Asian/Pacific Islander)	C50.1-Central portion of breast	Unknown	Left - origin of primary	Positive histology	IIA	T2	N0	M0	Localized	41	Surgery performed	24	100	0	0	10	10	98	0	0	0	3	0	0	0	98	Positive	Positive	Not 2010+ Breast	Not 2010+ Breast		Alive or dead of other cause	Dead (attributable to causes other than this cancer dx)	72	Dead	One primary only	No/Unknown	None/Unknown	No radiation and/or cancer-directed surgery	Hawaii - 1973+
Married (including common law)	86	2004	White	C50.1-Central portion of breast	Poorly differentiated; Grade III	Left - origin of primary	Positive histology	IIA	T2	N0	M0	Localized	41	Surgery performed	26	100	0	0	10	10	0	0	0	20	3	3	0	11	0	Positive	Positive	Not 2010+ Breast	Not 2010+ Breast		N/A not first tumor	N/A not first tumor	78	Dead	2nd of 2 or more primaries	No/Unknown	None/Unknown	No radiation and/or cancer-directed surgery	San Francisco-Oakland SMSA - 1973+
Widowed	91	2008	White	C50.1-Central portion of breast	Poorly differentiated; Grade III	Right - origin of primary	Positive histology	IIA	T2	N0	M0	Regional	51	Surgery performed	38	200	0	0	10	10	0	0	0	0	3	3	0	12	0	Positive	Positive	Not 2010+ Breast	Not 2010+ Breast		N/A not first tumor	N/A not first tumor	9	Dead	2nd of 2 or more primaries	No/Unknown	None/Unknown	No radiation and/or cancer-directed surgery	Louisiana - 2000+
Married (including common law)	90	2007	White	C50.9-Breast, NOS	Unknown	Left - origin of primary	Positive histology	UNK Stage	TX	NX	MX	Unknown/unstaged	0	Not recommended	999	999	999	99	998	998	98	987	987	0	1	9	9	0	98	Unknown	Unknown	Not 2010+ Breast	Not 2010+ Breast		N/A not first tumor	N/A not first tumor	23	Dead	2nd of 2 or more primaries	No/Unknown	None/Unknown	No radiation and/or cancer-directed surgery	California excluding SF/SJM/LA - 2000+
Unknown	91	2009	White	C50.9-Breast, NOS	Moderately differentiated; Grade II	Left - origin of primary	Positive histology	UNK Stage	TX	NX	MX	Unknown/unstaged	0	Recommended but not performed, unknown reason	999	999	999	99	10	10	99	987	987	987	9	9	9	99	99	Positive	Positive	Not 2010+ Breast	Not 2010+ Breast		Dead (attributable to this cancer dx)	Alive or dead due to cancer	22	Dead	One primary only	No/Unknown	None/Unknown	No radiation and/or cancer-directed surgery	New Jersey - 2000+
Married (including common law)	89	2006	White	C50.9-Breast, NOS	Poorly differentiated; Grade III	Left - origin of primary	Positive histology	I	T1c	N0	M0	Regional	22	Surgery performed	18	200	0	0	10	30	98	0	0	0	3	0	0	0	98	Positive	Borderline	Not 2010+ Breast	Not 2010+ Breast		N/A not first tumor	N/A not first tumor	24	Dead	2nd of 2 or more primaries	No/Unknown	None/Unknown	No radiation and/or cancer-directed surgery	New Jersey - 2000+
Married (including common law)	89	2007	White	C50.8-Overlapping lesion of breast	Moderately differentiated; Grade II	Right - origin of primary	Positive histology	I	T1c	N0	M0	Localized	24	Surgery performed	17	100	0	0	30	30	0	0	0	30	3	3	0	5	0	Borderline	Borderline	Not 2010+ Breast	Not 2010+ Breast		Alive or dead of other cause	Dead (attributable to causes other than this cancer dx)	7	Dead	One primary only	No/Unknown	None/Unknown	No radiation and/or cancer-directed surgery	California excluding SF/SJM/LA - 2000+
Unknown	87	2005	White	C50.9-Breast, NOS	Moderately differentiated; Grade II	Right - origin of primary	Positive histology	IIA	T1c	N1mi	M0	Regional	23	Surgery performed	17	100	130	0	997	997	1	987	987	0	3	3	0	1	1	Unknown	Unknown	Not 2010+ Breast	Not 2010+ Breast		Alive or dead of other cause	Dead (attributable to causes other than this cancer dx)	17	Dead	One primary only	No/Unknown	None/Unknown	No radiation and/or cancer-directed surgery	Detroit (Metropolitan) - 1973+
Married (including common law)	88	2005	White	C50.1-Central portion of breast	Unknown	Right - origin of primary	Positive histology	UNK Stage	TX	NX	M0	Unknown/unstaged	0	Not recommended	26	999	999	0	10	10	98	987	987	0	1	0	0	0	98	Positive	Positive	Not 2010+ Breast	Not 2010+ Breast		Alive or dead of other cause	Dead (attributable to causes other than this cancer dx)	6	Dead	One primary only	No/Unknown	None/Unknown	No radiation and/or cancer-directed surgery	San Francisco-Oakland SMSA - 1973+
Separated	90	2007	White	C50.9-Breast, NOS	Moderately differentiated; Grade II	Right - origin of primary	Positive histology	I	T1c	N0	M0	Localized	41	Surgery performed	11	100	0	0	998	998	98	0	0	20	3	0	0	0	98	Unknown	Unknown	Not 2010+ Breast	Not 2010+ Breast		N/A not first tumor	N/A not first tumor	55	Dead	3rd of 3 or more primaries	No/Unknown	None/Unknown	No radiation and/or cancer-directed surgery	San Francisco-Oakland SMSA - 1973+
Widowed	92	2009	White	C50.9-Breast, NOS	Moderately differentiated; Grade II	Right - origin of primary	Positive histology	IIB	T2	N1mi	M0	Regional	40	Surgery performed	29	100	150	0	10	10	1	987	987	0	3	3	0	4	1	Positive	Positive	Not 2010+ Breast	Not 2010+ Breast		Alive or dead of other cause	Dead (attributable to causes other than this cancer dx)	11	Dead	One primary only	No/Unknown	None/Unknown	No radiation and/or cancer-directed surgery	San Francisco-Oakland SMSA - 1973+
Married (including common law)	94	2011	White	C50.1-Central portion of breast	Moderately differentiated; Grade II	Left - origin of primary	Positive histology	I	T1c	N0	M0	Localized	41	Surgery performed	17	100	0	0	10	10	0	0	0	0	3	3	0	7	0	Positive	Positive	Negative	Her2-/HR+		N/A not first tumor	N/A not first tumor	24	Dead	2nd of 2 or more primaries	No/Unknown	None/Unknown	No radiation and/or cancer-directed surgery	Seattle (Puget Sound) - 1974+
Married (including common law)	95	2012	White	C50.4-Upper-outer quadrant of breast	Moderately differentiated; Grade II	Left - origin of primary	Positive histology	IIA	T2	N0	M0	Localized	0	Not recommended, contraindicated due to other cond; autopsy only (1973-2002)	35	100	0	0	10	10	98	0	0	0	0	0	0	0	98	Positive	Positive	Negative	Her2-/HR+		Alive or dead of other cause	Dead (attributable to causes other than this cancer dx)	2	Dead	One primary only	No/Unknown	None/Unknown	No radiation and/or cancer-directed surgery	New Jersey - 2000+
Widowed	89	2006	White	C50.9-Breast, NOS	Well differentiated; Grade I	Right - origin of primary	Positive histology	I	T1c	N0	M0	Localized	51	Surgery performed	18	100	0	0	10	10	0	0	0	0	3	3	0	17	0	Positive	Positive	Not 2010+ Breast	Not 2010+ Breast		N/A not first tumor	N/A not first tumor	34	Dead	2nd of 2 or more primaries	No/Unknown	None/Unknown	No radiation and/or cancer-directed surgery	Connecticut - 1973+
Widowed	89	2006	White	C50.9-Breast, NOS	Well differentiated; Grade I	Left - origin of primary	Positive histology	IIA	T2	N0(i+)	M0	Localized	41	Surgery performed	22	100	0	0	10	30	0	2	0	20	3	3	0	2	0	Positive	Borderline	Not 2010+ Breast	Not 2010+ Breast		N/A not first tumor	N/A not first tumor	3	Dead	2nd of 2 or more primaries	No/Unknown	None/Unknown	No radiation and/or cancer-directed surgery	Connecticut - 1973+
Married (including common law)	89	2006	White	C50.0-Nipple	Poorly differentiated; Grade III	Right - origin of primary	Positive histology	IIIB	T4b	N0(i-)	M0	Regional	40	Surgery performed	15	510	0	0	10	10	0	1	0	20	3	3	0	1	0	Positive	Positive	Not 2010+ Breast	Not 2010+ Breast		Alive or dead of other cause	Dead (attributable to causes other than this cancer dx)	35	Dead	1st of 2 or more primaries	No/Unknown	Beam radiation	Radiation after surgery	California excluding SF/SJM/LA - 2000+
Single (never married)	90	2007	White	C50.9-Breast, NOS	Moderately differentiated; Grade II	Right - origin of primary	Positive histology	UNK Stage	TX	N0	M0	Localized	0	Not recommended	999	100	0	0	20	10	98	0	0	0	3	0	0	0	98	Negative	Positive	Not 2010+ Breast	Not 2010+ Breast		N/A not first tumor	N/A not first tumor	15	Dead	2nd of 2 or more primaries	No/Unknown	None/Unknown	No radiation and/or cancer-directed surgery	California excluding SF/SJM/LA - 2000+
Unknown	92	2011	White	C50.9-Breast, NOS	Moderately differentiated; Grade II	Left - origin of primary	Positive histology	UNK Stage	TX	NX	MX	Unknown/unstaged	0	Not recommended, contraindicated due to other cond; autopsy only (1973-2002)	999	999	999	99	999	999	98	987	987	987	9	9	9	0	98	Unknown	Unknown	Unknown	Unknown		Alive or dead of other cause	Dead (attributable to causes other than this cancer dx)	3	Dead	One primary only	No/Unknown	None/Unknown	No radiation and/or cancer-directed surgery	Seattle (Puget Sound) - 1974+
Married (including common law)	93	2012	Black	C50.1-Central portion of breast	Poorly differentiated; Grade III	Left - origin of primary	Positive histology	I	T1c	N0	M0	Localized	41	Surgery performed	20	100	0	0	10	10	0	0	0	20	3	3	0	3	0	Positive	Positive	Negative	Her2-/HR+		Alive or dead of other cause	Dead (attributable to causes other than this cancer dx)	5	Dead	One primary only	No/Unknown	None/Unknown	No radiation and/or cancer-directed surgery	Kentucky - 2000+
Widowed	86	2005	White	C50.8-Overlapping lesion of breast	Poorly differentiated; Grade III	Left - origin of primary	Positive histology	IIIC	T3	N3c	M0	Distant	41	Surgery performed	79	200	800	0	998	998	98	987	987	0	3	0	0	0	98	Unknown	Unknown	Not 2010+ Breast	Not 2010+ Breast		Dead (attributable to this cancer dx)	Alive or dead due to cancer	0	Dead	One primary only	No/Unknown	None/Unknown	No radiation and/or cancer-directed surgery	Louisiana - 2000+
Widowed	87	2006	White	C50.4-Upper-outer quadrant of breast	Moderately differentiated; Grade II	Left - origin of primary	Positive histology	I	T1b	N0(i-)	M0	Localized	41	Surgery performed	7	100	0	0	10	10	0	1	0	0	3	3	0	2	0	Positive	Positive	Not 2010+ Breast	Not 2010+ Breast		Alive or dead of other cause	Dead (attributable to causes other than this cancer dx)	48	Dead	One primary only	No/Unknown	None/Unknown	No radiation and/or cancer-directed surgery	California excluding SF/SJM/LA - 2000+
Unknown	87	2006	White	C50.4-Upper-outer quadrant of breast	Unknown	Left - origin of primary	Positive exfoliative cytology, no positive histology	UNK Stage	TX	N0	M0	Localized	0	Not recommended	999	100	0	0	999	999	98	0	0	0	1	0	0	0	98	Unknown	Unknown	Not 2010+ Breast	Not 2010+ Breast		N/A not first tumor	N/A not first tumor	16	Dead	3rd of 3 or more primaries	No/Unknown	None/Unknown	No radiation and/or cancer-directed surgery	New Jersey - 2000+
Married (including common law)	86	2004	White	C50.0-Nipple	Unknown	Right - origin of primary	Positive histology	I	T1c	N0	M0	Localized	24	Surgery performed	14	100	0	0	10	10	98	0	0	0	3	0	0	0	98	Positive	Positive	Not 2010+ Breast	Not 2010+ Breast		Alive or dead of other cause	Dead (attributable to causes other than this cancer dx)	118	Dead	One primary only	No/Unknown	None/Unknown	No radiation and/or cancer-directed surgery	Greater Georgia - 2000+
Widowed	86	2005	White	C50.0-Nipple	Moderately differentiated; Grade II	Right - origin of primary	Positive histology	UNK Stage	T2	N2a	MX	Regional	50	Surgery performed	22	200	600	99	10	10	5	987	987	0	3	3	0	7	5	Positive	Positive	Not 2010+ Breast	Not 2010+ Breast		N/A not first tumor	N/A not first tumor	53	Dead	2nd of 2 or more primaries	No/Unknown	None/Unknown	No radiation and/or cancer-directed surgery	New Jersey - 2000+
Widowed	86	2004	White	C50.1-Central portion of breast	Poorly differentiated; Grade III	Right - origin of primary	Positive histology	IV	T1c	NX	M1	Distant	22	Surgery performed	18	200	999	44	10	10	98	987	987	30	Blank(s)	Blank(s)	Blank(s)	0	98	Positive	Positive	Not 2010+ Breast	Not 2010+ Breast		Dead (attributable to this cancer dx)	Alive or dead due to cancer	34	Dead	One primary only	No/Unknown	None/Unknown	No radiation and/or cancer-directed surgery	Seattle (Puget Sound) - 1974+
Married (including common law)	87	2005	White	C50.1-Central portion of breast	Moderately differentiated; Grade II	Left - origin of primary	Positive histology	I	T1c	N0	M0	Regional	24	Surgery performed	20	200	0	0	10	20	98	0	0	0	3	0	0	0	98	Positive	Negative	Not 2010+ Breast	Not 2010+ Breast		Alive or dead of other cause	Dead (attributable to causes other than this cancer dx)	38	Dead	One primary only	No/Unknown	None/Unknown	No radiation and/or cancer-directed surgery	California excluding SF/SJM/LA - 2000+
Married (including common law)	90	2008	White	C50.1-Central portion of breast	Moderately differentiated; Grade II	Left - origin of primary	Positive histology	IIA	T2	N0	M0	Localized	41	Surgery performed	30	100	0	0	10	10	98	0	0	0	3	0	0	0	98	Positive	Positive	Not 2010+ Breast	Not 2010+ Breast		Alive or dead of other cause	Dead (attributable to causes other than this cancer dx)	37	Dead	One primary only	No/Unknown	None/Unknown	No radiation and/or cancer-directed surgery	New Jersey - 2000+
Widowed	86	2004	White	C50.1-Central portion of breast	Poorly differentiated; Grade III	Left - origin of primary	Positive histology	IIA	T2	N0	M0	Localized	41	Surgery performed	28	100	0	0	998	998	0	0	0	20	3	3	0	1	0	Unknown	Unknown	Not 2010+ Breast	Not 2010+ Breast		Alive or dead of other cause	Alive or dead due to cancer	126	Alive	One primary only	No/Unknown	None/Unknown	No radiation and/or cancer-directed surgery	San Francisco-Oakland SMSA - 1973+
Married (including common law)	85	2004	White	C50.1-Central portion of breast	Moderately differentiated; Grade II	Right - origin of primary	Positive histology	IIA	T1c	N1mi	M0	Regional	51	Surgery performed	16	100	130	0	10	10	1	987	987	0	0	3	0	13	1	Positive	Positive	Not 2010+ Breast	Not 2010+ Breast		Alive or dead of other cause	Dead (attributable to causes other than this cancer dx)	69	Dead	One primary only	No/Unknown	None/Unknown	No radiation and/or cancer-directed surgery	New Jersey - 2000+
Married (including common law)	88	2006	White	C50.9-Breast, NOS	Moderately differentiated; Grade II	Left - origin of primary	Positive histology	UNK Stage	T2	NX	MX	Localized	22	Surgery performed	23	100	999	99	998	998	98	987	987	0	3	9	9	0	98	Unknown	Unknown	Not 2010+ Breast	Not 2010+ Breast		Alive or dead of other cause	Dead (attributable to causes other than this cancer dx)	4	Dead	1st of 2 or more primaries	Yes	None/Unknown	No radiation and/or cancer-directed surgery	New Jersey - 2000+
Married (including common law)	86	2005	White	C50.9-Breast, NOS	Poorly differentiated; Grade III	Right - origin of primary	Positive histology	IIA	T1c	N1a	M0	Regional	51	Surgery performed	20	100	600	0	10	10	2	987	987	0	3	3	0	13	2	Positive	Positive	Not 2010+ Breast	Not 2010+ Breast		Alive or dead of other cause	Dead (attributable to causes other than this cancer dx)	89	Dead	One primary only	No/Unknown	None/Unknown	No radiation and/or cancer-directed surgery	New Jersey - 2000+
Married (including common law)	94	2012	White	C50.8-Overlapping lesion of breast	Unknown	Left - origin of primary	Positive histology	IIIB	T4d	N1	M0	Regional	0	Not recommended	60	750	600	0	10	10	95	987	987	987	1	1	0	95	95	Positive	Positive	Negative	Her2-/HR+		Alive or dead of other cause	Alive or dead due to cancer	28	Alive	One primary only	No/Unknown	Beam radiation	No radiation and/or cancer-directed surgery	California excluding SF/SJM/LA - 2000+
Single (never married)	86	2005	White	C50.1-Central portion of breast	Moderately differentiated; Grade II	Right - origin of primary	Positive histology	I	T1c	N0	M0	Localized	51	Surgery performed	13	100	0	0	10	10	0	0	0	30	3	3	0	8	0	Positive	Positive	Not 2010+ Breast	Not 2010+ Breast		N/A not first tumor	N/A not first tumor	54	Dead	2nd of 2 or more primaries	No/Unknown	None/Unknown	No radiation and/or cancer-directed surgery	Los Angeles - 1992+
Married (including common law)	91	2009	White	C50.9-Breast, NOS	Moderately differentiated; Grade II	Right - origin of primary	Positive histology	IV	T2	N1	M1	Distant	0	Not recommended	31	100	600	44	10	10	98	987	987	987	1	0	0	0	98	Positive	Positive	Not 2010+ Breast	Not 2010+ Breast		Alive or dead of other cause	Dead (attributable to causes other than this cancer dx)	58	Dead	One primary only	No/Unknown	None/Unknown	No radiation and/or cancer-directed surgery	California excluding SF/SJM/LA - 2000+
Married (including common law)	88	2007	White	C50.9-Breast, NOS	Unknown	Paired site, but no information concerning laterality	Positive histology	UNK Stage	TX	N1	MX	Regional	0	Not recommended	999	999	255	99	10	20	95	987	987	987	0	1	0	95	95	Positive	Negative	Not 2010+ Breast	Not 2010+ Breast		Dead (attributable to this cancer dx)	Alive or dead due to cancer	12	Dead	One primary only	No/Unknown	None/Unknown	No radiation and/or cancer-directed surgery	California excluding SF/SJM/LA - 2000+
Widowed	89	2007	Black	C50.5-Lower-outer quadrant of breast	Unknown	Left - origin of primary	Positive histology	IIIC	T3	N3a	M0	Regional	41	Surgery performed	60	100	750	0	10	10	8	987	987	30	3	3	0	16	8	Positive	Positive	Not 2010+ Breast	Not 2010+ Breast		Dead (attributable to this cancer dx)	Alive or dead due to cancer	38	Dead	One primary only	No/Unknown	None/Unknown	No radiation and/or cancer-directed surgery	Los Angeles - 1992+
Widowed	88	2006	White	C50.1-Central portion of breast	Moderately differentiated; Grade II	Left - origin of primary	Positive histology	I	T1c	N0(i-)	M0	Localized	24	Surgery performed	15	100	0	0	10	10	0	1	0	30	3	3	0	1	0	Positive	Positive	Not 2010+ Breast	Not 2010+ Breast		Alive or dead of other cause	Alive or dead due to cancer	98	Alive	One primary only	No/Unknown	None/Unknown	No radiation and/or cancer-directed surgery	Los Angeles - 1992+
Married (including common law)	88	2006	White	C50.1-Central portion of breast	Poorly differentiated; Grade III	Right - origin of primary	Positive histology	IIA	T2	N0	M0	Regional	51	Surgery performed	23	200	0	0	10	10	0	0	0	20	3	3	0	13	0	Positive	Positive	Not 2010+ Breast	Not 2010+ Breast		Alive or dead of other cause	Dead (attributable to causes other than this cancer dx)	15	Dead	One primary only	No/Unknown	None/Unknown	No radiation and/or cancer-directed surgery	San Francisco-Oakland SMSA - 1973+
Widowed	86	2004	White	C50.0-Nipple	Moderately differentiated; Grade II	Right - origin of primary	Positive histology	IIA	T2	N0	M0	Localized	41	Surgery performed	40	100	0	0	10	10	0	0	0	0	3	3	0	2	0	Positive	Positive	Not 2010+ Breast	Not 2010+ Breast		Alive or dead of other cause	Dead (attributable to causes other than this cancer dx)	98	Dead	One primary only	No/Unknown	None/Unknown	No radiation and/or cancer-directed surgery	San Francisco-Oakland SMSA - 1973+
Widowed	87	2006	White	C50.1-Central portion of breast	Moderately differentiated; Grade II	Right - origin of primary	Positive histology	IIA	T2	N0	M0	Localized	41	Surgery performed	24	100	0	0	10	10	0	0	0	0	3	3	0	11	0	Positive	Positive	Not 2010+ Breast	Not 2010+ Breast		Alive or dead of other cause	Dead (attributable to causes other than this cancer dx)	86	Dead	One primary only	No/Unknown	None/Unknown	No radiation and/or cancer-directed surgery	San Francisco-Oakland SMSA - 1973+
Widowed	86	2004	White	C50.9-Breast, NOS	Moderately differentiated; Grade II	Right - origin of primary	Positive histology	IIA	T2	N0	M0	Localized	41	Surgery performed	30	100	0	0	10	10	98	0	0	20	3	0	0	0	98	Positive	Positive	Not 2010+ Breast	Not 2010+ Breast		Alive or dead of other cause	Dead (attributable to causes other than this cancer dx)	2	Dead	One primary only	No/Unknown	None/Unknown	No radiation and/or cancer-directed surgery	California excluding SF/SJM/LA - 2000+
Married (including common law)	86	2004	White	C50.9-Breast, NOS	Moderately differentiated; Grade II	Left - origin of primary	Positive histology	IIB	T2	N1	M0	Regional	0	Not recommended	35	100	260	0	20	20	98	987	987	0	1	0	0	0	98	Negative	Negative	Not 2010+ Breast	Not 2010+ Breast		N/A not first tumor	N/A not first tumor	4	Dead	2nd of 2 or more primaries	No/Unknown	Beam radiation	No radiation and/or cancer-directed surgery	California excluding SF/SJM/LA - 2000+
Married (including common law)	90	2008	White	C50.5-Lower-outer quadrant of breast	Poorly differentiated; Grade III	Left - origin of primary	Positive histology	IIA	T2	N0	M0	Localized	41	Surgery performed	25	100	0	0	20	20	98	0	0	20	3	0	0	0	98	Negative	Negative	Not 2010+ Breast	Not 2010+ Breast		N/A not first tumor	N/A not first tumor	15	Dead	3rd of 3 or more primaries	No/Unknown	None/Unknown	No radiation and/or cancer-directed surgery	California excluding SF/SJM/LA - 2000+
Widowed	92	2010	White	C50.1-Central portion of breast	Moderately differentiated; Grade II	Right - origin of primary	Positive histology	I	T1c	N0(i-)	M0	Localized	41	Surgery performed	18	100	0	0	10	10	0	1	0	0	3	3	0	7	0	Positive	Positive	Negative	Her2-/HR+		N/A not first tumor	N/A not first tumor	12	Dead	2nd of 2 or more primaries	No/Unknown	None/Unknown	No radiation and/or cancer-directed surgery	Los Angeles - 1992+
Married (including common law)	88	2008	White	C50.0-Nipple	Well differentiated; Grade I	Right - origin of primary	Positive histology	IIA	T2	N0	M0	Localized	51	Surgery performed	25	100	0	0	998	998	98	0	0	20	3	0	0	0	98	Unknown	Unknown	Not 2010+ Breast	Not 2010+ Breast		Dead (attributable to this cancer dx)	Alive or dead due to cancer	13	Dead	One primary only	No/Unknown	None/Unknown	No radiation and/or cancer-directed surgery	San Francisco-Oakland SMSA - 1973+
Married (including common law)	87	2007	White	C50.9-Breast, NOS	Poorly differentiated; Grade III	Right - origin of primary	Positive histology	IIA	T1c	N1a	M0	Regional	51	Surgery performed	18	100	250	0	10	10	1	987	987	0	Blank(s)	Blank(s)	Blank(s)	24	1	Positive	Positive	Not 2010+ Breast	Not 2010+ Breast		N/A not first tumor	N/A not first tumor	94	Alive	4th of 4 or more primaries	No/Unknown	None/Unknown	No radiation and/or cancer-directed surgery	Seattle (Puget Sound) - 1974+
Widowed	86	2006	White	C50.1-Central portion of breast	Moderately differentiated; Grade II	Right - origin of primary	Positive histology	IIIB	T4b	N0	M0	Regional	41	Surgery performed	999	510	0	0	10	10	98	0	0	0	Blank(s)	Blank(s)	Blank(s)	0	98	Positive	Positive	Not 2010+ Breast	Not 2010+ Breast		Dead (attributable to this cancer dx)	Alive or dead due to cancer	6	Dead	One primary only	No/Unknown	Beam radiation	Radiation prior to surgery	Iowa - 1973+
Married (including common law)	85	2005	White	C50.1-Central portion of breast	Poorly differentiated; Grade III	Left - origin of primary	Positive histology	IIA	T2	N0	M0	Localized	51	Surgery performed	22	100	0	0	10	10	0	0	0	0	Blank(s)	Blank(s)	Blank(s)	3	0	Positive	Positive	Not 2010+ Breast	Not 2010+ Breast		Alive or dead of other cause	Dead (attributable to causes other than this cancer dx)	57	Dead	One primary only	No/Unknown	None/Unknown	No radiation and/or cancer-directed surgery	Seattle (Puget Sound) - 1974+
Married (including common law)	91	2011	White	C50.4-Upper-outer quadrant of breast	Moderately differentiated; Grade II	Right - origin of primary	Positive histology	IIIB	T4b	N1mi	M0	Regional	30	Surgery performed	31	512	130	0	10	10	1	987	987	0	3	3	0	2	1	Positive	Positive	Negative	Her2-/HR+		N/A not first tumor	N/A not first tumor	45	Alive	4th of 4 or more primaries	No/Unknown	Beam radiation	Radiation after surgery	Kentucky - 2000+
Widowed	86	2006	White	C50.1-Central portion of breast	Moderately differentiated; Grade II	Left - origin of primary	Positive histology	IIA	T1c	N1mi	M0	Regional	51	Surgery performed	13	100	150	0	10	20	1	987	987	20	3	3	0	14	1	Positive	Negative	Not 2010+ Breast	Not 2010+ Breast		Alive or dead of other cause	Alive or dead due to cancer	105	Alive	One primary only	No/Unknown	None/Unknown	No radiation and/or cancer-directed surgery	Louisiana - 2000+
Widowed	89	2009	White	C50.1-Central portion of breast	Poorly differentiated; Grade III	Left - origin of primary	Positive histology	IIA	T2	N0(i-)	M0	Localized	41	Surgery performed	21	100	0	0	10	10	0	1	0	30	3	3	0	3	0	Positive	Positive	Not 2010+ Breast	Not 2010+ Breast		Alive or dead of other cause	Dead (attributable to causes other than this cancer dx)	43	Dead	One primary only	No/Unknown	None/Unknown	No radiation and/or cancer-directed surgery	California excluding SF/SJM/LA - 2000+
Married (including common law)	85	2004	White	C50.5-Lower-outer quadrant of breast	Moderately differentiated; Grade II	Left - origin of primary	Positive histology	I	T1c	N0(i-)	M0	Localized	41	Surgery performed	15	100	0	0	10	10	0	1	0	0	3	3	0	2	0	Positive	Positive	Not 2010+ Breast	Not 2010+ Breast		N/A not first tumor	N/A not first tumor	31	Dead	3rd of 3 or more primaries	No/Unknown	None/Unknown	No radiation and/or cancer-directed surgery	Hawaii - 1973+
Married (including common law)	86	2006	White	C50.9-Breast, NOS	Moderately differentiated; Grade II	Right - origin of primary	Positive histology	I	T1c	N0(i-)	M0	Localized	41	Surgery performed	16	100	0	0	10	10	0	1	0	0	3	3	0	3	0	Positive	Positive	Not 2010+ Breast	Not 2010+ Breast		Alive or dead of other cause	Alive or dead due to cancer	102	Alive	One primary only	No/Unknown	None/Unknown	No radiation and/or cancer-directed surgery	San Francisco-Oakland SMSA - 1973+
Married (including common law)	87	2007	White	C50.1-Central portion of breast	Moderately differentiated; Grade II	Left - origin of primary	Positive histology	UNK Stage	T2	NX	M0	Regional	41	Surgery performed	30	200	999	0	10	10	98	987	987	0	3	0	0	0	98	Positive	Positive	Not 2010+ Breast	Not 2010+ Breast		Alive or dead of other cause	Dead (attributable to causes other than this cancer dx)	13	Dead	One primary only	No/Unknown	None/Unknown	No radiation and/or cancer-directed surgery	Utah - 1973+
Married (including common law)	85	2004	White	C50.0-Nipple	Moderately differentiated; Grade II	Left - origin of primary	Positive histology	IIIC	T1c	N3a	M0	Regional	51	Surgery performed	14	100	600	0	10	10	11	987	987	0	3	3	0	13	11	Positive	Positive	Not 2010+ Breast	Not 2010+ Breast		Alive or dead of other cause	Dead (attributable to causes other than this cancer dx)	27	Dead	One primary only	No/Unknown	Beam radiation	Radiation after surgery	San Francisco-Oakland SMSA - 1973+
Married (including common law)	92	2011	White	C50.1-Central portion of breast	Moderately differentiated; Grade II	Left - origin of primary	Positive histology	IIB	T2	N1a	M0	Regional	52	Surgery performed	24	100	250	0	10	10	1	987	987	50	3	3	0	9	1	Positive	Positive	Negative	Her2-/HR+		Alive or dead of other cause	Alive or dead due to cancer	41	Alive	One primary only	No/Unknown	Recommended, unknown if administered	No radiation and/or cancer-directed surgery	Seattle (Puget Sound) - 1974+
Widowed	84	2004	White	C50.9-Breast, NOS	Poorly differentiated; Grade III	Left - origin of primary	Positive histology	IIA	T2	N0(i-)	M0	Localized	41	Surgery performed	27	100	0	0	10	10	0	1	0	0	Blank(s)	Blank(s)	Blank(s)	4	0	Positive	Positive	Not 2010+ Breast	Not 2010+ Breast		Alive or dead of other cause	Dead (attributable to causes other than this cancer dx)	107	Dead	One primary only	No/Unknown	None/Unknown	No radiation and/or cancer-directed surgery	Seattle (Puget Sound) - 1974+
Married (including common law)	85	2005	White	C50.4-Upper-outer quadrant of breast	Moderately differentiated; Grade II	Right - origin of primary	Positive histology	IIA	T2	N0(i+)	M0	Regional	41	Surgery performed	22	200	0	0	10	10	0	2	0	20	3	3	0	3	0	Positive	Positive	Not 2010+ Breast	Not 2010+ Breast		N/A not first tumor	N/A not first tumor	113	Alive	3rd of 3 or more primaries	No/Unknown	None/Unknown	No radiation and/or cancer-directed surgery	California excluding SF/SJM/LA - 2000+
Widowed	88	2007	White	C50.9-Breast, NOS	Poorly differentiated; Grade III	Right - origin of primary	Positive histology	UNK Stage	TX	NX	M0	Localized	0	Not recommended, contraindicated due to other cond; autopsy only (1973-2002)	999	100	999	0	10	10	98	987	987	0	1	9	0	0	98	Positive	Positive	Not 2010+ Breast	Not 2010+ Breast		Dead (attributable to this cancer dx)	Alive or dead due to cancer	16	Dead	One primary only	No/Unknown	None/Unknown	No radiation and/or cancer-directed surgery	Atlanta (Metropolitan) - 1975+
Divorced	86	2005	White	C50.9-Breast, NOS	Poorly differentiated; Grade III	Right - origin of primary	Positive histology	IIA	T2	N0(i-)	M0	Localized	41	Surgery performed	23	100	0	0	10	10	0	1	1	50	3	3	1	1	0	Positive	Positive	Not 2010+ Breast	Not 2010+ Breast		Alive or dead of other cause	Dead (attributable to causes other than this cancer dx)	49	Dead	One primary only	No/Unknown	None/Unknown	No radiation and/or cancer-directed surgery	Greater Georgia - 2000+
Widowed	94	2013	White	C50.9-Breast, NOS	Moderately differentiated; Grade II	Left - origin of primary	Positive histology	IIIB	T4b	N0	M0	Regional	41	Surgery performed	27	512	0	0	10	10	98	0	0	0	3	0	0	0	98	Positive	Positive	Positive	Her2+/HR+		Alive or dead of other cause	Dead (attributable to causes other than this cancer dx)	10	Dead	One primary only	No/Unknown	None/Unknown	No radiation and/or cancer-directed surgery	Iowa - 1973+
Widowed	84	2004	White	C50.1-Central portion of breast	Moderately differentiated; Grade II	Left - origin of primary	Positive histology	I	T1c	N0	M0	Localized	41	Surgery performed	15	100	0	0	10	10	98	0	0	0	Blank(s)	Blank(s)	Blank(s)	0	98	Positive	Positive	Not 2010+ Breast	Not 2010+ Breast		Alive or dead of other cause	Dead (attributable to causes other than this cancer dx)	107	Dead	One primary only	No/Unknown	Beam radiation	Radiation after surgery	Seattle (Puget Sound) - 1974+
Married (including common law)	85	2004	White	C50.0-Nipple	Moderately differentiated; Grade II	Right - origin of primary	Positive histology	IIA	T2	N0	M0	Localized	0	Not recommended	36	100	0	0	10	10	98	0	0	987	1	0	0	0	98	Positive	Positive	Not 2010+ Breast	Not 2010+ Breast		N/A not first tumor	N/A not first tumor	18	Dead	2nd of 2 or more primaries	No/Unknown	None/Unknown	No radiation and/or cancer-directed surgery	Atlanta (Metropolitan) - 1975+
Widowed	91	2010	White	C50.8-Overlapping lesion of breast	Moderately differentiated; Grade II	Left - origin of primary	Positive histology	I	T1c	N0(i-)	M0	Localized	41	Surgery performed	18	100	0	0	10	10	0	1	0	0	3	0	0	1	0	Positive	Positive	Negative	Her2-/HR+		Alive or dead of other cause	Alive or dead due to cancer	50	Alive	One primary only	No/Unknown	None/Unknown	No radiation and/or cancer-directed surgery	California excluding SF/SJM/LA - 2000+
Married (including common law)	90	2009	White	C50.9-Breast, NOS	Moderately differentiated; Grade II	Left - origin of primary	Positive histology	IIA	T1c	N1a	M0	Regional	51	Surgery performed	18	200	250	0	999	999	3	987	987	50	3	3	0	16	3	Unknown	Unknown	Not 2010+ Breast	Not 2010+ Breast		N/A not first tumor	N/A not first tumor	22	Dead	2nd of 2 or more primaries	No/Unknown	None/Unknown	No radiation and/or cancer-directed surgery	California excluding SF/SJM/LA - 2000+
Married (including common law)	91	2010	White	C50.0-Nipple	Undifferentiated; anaplastic; Grade IV	Right - origin of primary	Positive histology	UNK Stage	TX	N0	M0	Localized	40	Surgery performed	999	100	0	0	10	10	98	0	0	0	3	3	0	12	0	Positive	Positive	Negative	Her2-/HR+		Alive or dead of other cause	Dead (attributable to causes other than this cancer dx)	8	Dead	One primary only	No/Unknown	None/Unknown	No radiation and/or cancer-directed surgery	Los Angeles - 1992+
Married (including common law)	88	2008	White	C50.3-Lower-inner quadrant of breast	Moderately differentiated; Grade II	Left - origin of primary	Positive histology	UNK Stage	TX	N0	M0	Localized	41	Surgery performed	999	100	0	0	10	10	0	0	0	0	3	3	0	2	0	Positive	Positive	Not 2010+ Breast	Not 2010+ Breast		N/A not first tumor	N/A not first tumor	42	Dead	2nd of 2 or more primaries	No/Unknown	None/Unknown	No radiation and/or cancer-directed surgery	San Francisco-Oakland SMSA - 1973+
Separated	85	2004	Black	C50.5-Lower-outer quadrant of breast	Unknown	Right - origin of primary	Positive exfoliative cytology, no positive histology	IIA	T2	N0	M0	Regional	0	Recommended but not performed, patient refused	40	200	0	0	998	998	98	0	0	0	0	9	0	0	98	Unknown	Unknown	Not 2010+ Breast	Not 2010+ Breast		Dead (attributable to this cancer dx)	Alive or dead due to cancer	20	Dead	One primary only	No/Unknown	None/Unknown	No radiation and/or cancer-directed surgery	San Francisco-Oakland SMSA - 1973+
Married (including common law)	85	2005	White	C50.1-Central portion of breast	Moderately differentiated; Grade II	Left - origin of primary	Positive histology	I	T1c	N0(i-)	M0	Localized	51	Surgery performed	17	100	0	0	10	10	0	1	0	0	3	3	0	4	0	Positive	Positive	Not 2010+ Breast	Not 2010+ Breast		N/A not first tumor	N/A not first tumor	67	Dead	2nd of 2 or more primaries	No/Unknown	None/Unknown	No radiation and/or cancer-directed surgery	Detroit (Metropolitan) - 1973+
Married (including common law)	85	2004	Other (American Indian/AK Native, Asian/Pacific Islander)	C50.0-Nipple	Poorly differentiated; Grade III	Right - origin of primary	Positive histology	IIA	T2	N0	M0	Localized	51	Surgery performed	27	100	0	0	10	10	0	0	0	50	3	3	0	4	0	Positive	Positive	Not 2010+ Breast	Not 2010+ Breast		N/A not first tumor	N/A not first tumor	18	Dead	3rd of 3 or more primaries	No/Unknown	None/Unknown	No radiation and/or cancer-directed surgery	San Francisco-Oakland SMSA - 1973+
Widowed	91	2011	White	C50.1-Central portion of breast	Poorly differentiated; Grade III	Right - origin of primary	Positive histology	IIA	T2	N0	M0	Localized	41	Surgery performed	30	100	0	0	10	20	98	0	0	0	3	0	0	0	98	Positive	Negative	Borderline	Unknown		Alive or dead of other cause	Dead (attributable to causes other than this cancer dx)	16	Dead	One primary only	No/Unknown	None/Unknown	No radiation and/or cancer-directed surgery	Detroit (Metropolitan) - 1973+
Married (including common law)	89	2008	White	C50.5-Lower-outer quadrant of breast	Moderately differentiated; Grade II	Right - origin of primary	Positive histology	I	T1c	N0	M0	Localized	51	Surgery performed	15	100	0	0	10	10	0	0	0	0	3	3	0	19	0	Positive	Positive	Not 2010+ Breast	Not 2010+ Breast		Alive or dead of other cause	Alive or dead due to cancer	72	Alive	One primary only	No/Unknown	None/Unknown	No radiation and/or cancer-directed surgery	California excluding SF/SJM/LA - 2000+
Married (including common law)	86	2007	White	C50.1-Central portion of breast	Poorly differentiated; Grade III	Right - origin of primary	Positive histology	IIIC	T2	N3a	M0	Regional	51	Surgery performed	50	200	520	0	999	999	17	987	987	0	3	3	0	17	17	Unknown	Unknown	Not 2010+ Breast	Not 2010+ Breast		N/A not first tumor	N/A not first tumor	46	Dead	2nd of 2 or more primaries	No/Unknown	Beam radiation	Radiation after surgery	New Jersey - 2000+
Married (including common law)	89	2010	White	C50.1-Central portion of breast	Moderately differentiated; Grade II	Right - origin of primary	Positive histology	I	T1c	N0(i-)	M0	Regional	41	Surgery performed	16	200	0	0	10	10	0	1	0	30	3	3	0	1	0	Positive	Positive	Negative	Her2-/HR+		N/A not first tumor	N/A not first tumor	57	Dead	3rd of 3 or more primaries	No/Unknown	None/Unknown	No radiation and/or cancer-directed surgery	California excluding SF/SJM/LA - 2000+
Married (including common law)	83	2004	White	C50.1-Central portion of breast	Moderately differentiated; Grade II	Left - origin of primary	Positive histology	IIA	T1c	N1a	M0	Regional	41	Surgery performed	18	100	600	0	10	10	1	987	987	0	Blank(s)	Blank(s)	Blank(s)	4	1	Positive	Positive	Not 2010+ Breast	Not 2010+ Breast		Dead (attributable to this cancer dx)	Alive or dead due to cancer	47	Dead	1st of 2 or more primaries	No/Unknown	Beam radiation	Radiation after surgery	Iowa - 1973+
Married (including common law)	92	2013	White	C50.1-Central portion of breast	Unknown	Left - origin of primary	Positive histology	IIA	T2	N0	M0	Localized	0	Not recommended, contraindicated due to other cond; autopsy only (1973-2002)	27	100	0	0	10	10	98	0	0	0	1	0	0	0	98	Positive	Positive	Negative	Her2-/HR+		Alive or dead of other cause	Dead (attributable to causes other than this cancer dx)	14	Dead	One primary only	No/Unknown	None/Unknown	No radiation and/or cancer-directed surgery	New Jersey - 2000+
Married (including common law)	87	2007	White	C50.9-Breast, NOS	Moderately differentiated; Grade II	Right - origin of primary	Positive histology	IIA	T2	N0	M0	Localized	41	Surgery performed	31	100	0	0	10	10	0	0	0	0	3	3	0	4	0	Positive	Positive	Not 2010+ Breast	Not 2010+ Breast		Alive or dead of other cause	Dead (attributable to causes other than this cancer dx)	37	Dead	1st of 2 or more primaries	No/Unknown	None/Unknown	No radiation and/or cancer-directed surgery	Greater Georgia - 2000+
Widowed	93	2013	White	C50.1-Central portion of breast	Poorly differentiated; Grade III	Right - origin of primary	Positive histology	UNK Stage	T2	NX	M0	Localized	41	Surgery performed	25	100	999	0	10	10	98	987	987	30	3	9	0	98	0	Positive	Positive	Negative	Her2-/HR+		Alive or dead of other cause	Dead (attributable to causes other than this cancer dx)	18	Dead	One primary only	No/Unknown	None/Unknown	No radiation and/or cancer-directed surgery	Kentucky - 2000+
Married (including common law)	84	2005	White	C50.4-Upper-outer quadrant of breast	Moderately differentiated; Grade II	Right - origin of primary	Positive histology	IIB	T2	N1a	M0	Regional	41	Surgery performed	22	100	600	0	10	10	1	987	987	30	3	3	0	16	1	Positive	Positive	Not 2010+ Breast	Not 2010+ Breast		N/A not first tumor	N/A not first tumor	117	Alive	3rd of 3 or more primaries	No/Unknown	None/Unknown	No radiation and/or cancer-directed surgery	New Jersey - 2000+
Married (including common law)	87	2008	White	C50.1-Central portion of breast	Moderately differentiated; Grade II	Left - origin of primary	Positive histology	IIIA	T2	N2a	M0	Regional	51	Surgery performed	28	100	250	0	10	10	4	987	987	0	3	3	0	18	4	Positive	Positive	Not 2010+ Breast	Not 2010+ Breast		N/A not first tumor	N/A not first tumor	33	Dead	2nd of 2 or more primaries	No/Unknown	None/Unknown	No radiation and/or cancer-directed surgery	San Francisco-Oakland SMSA - 1973+
Widowed	91	2012	White	C50.3-Lower-inner quadrant of breast	Moderately differentiated; Grade II	Left - origin of primary	Positive histology	IIA	T1c	N1a	M0	Regional	51	Surgery performed	19	200	250	0	10	10	2	987	987	20	3	3	0	4	2	Positive	Positive	Negative	Her2-/HR+		N/A not first tumor	N/A not first tumor	31	Alive	2nd of 2 or more primaries	No/Unknown	Beam radiation	Radiation after surgery	Seattle (Puget Sound) - 1974+
Married (including common law)	93	2013	White	C50.9-Breast, NOS	Poorly differentiated; Grade III	Left - origin of primary	Positive histology	IIIB	T4b	N1	M0	Regional	0	Not recommended	60	512	260	0	10	10	1	987	987	0	0	1	0	1	1	Positive	Positive	Negative	Her2-/HR+		N/A not first tumor	N/A not first tumor	12	Alive	2nd of 2 or more primaries	No/Unknown	None/Unknown	No radiation and/or cancer-directed surgery	Los Angeles - 1992+
Married (including common law)	86	2007	White	C50.5-Lower-outer quadrant of breast	Well differentiated; Grade I	Left - origin of primary	Positive histology	IIIB	T4b	N0	M0	Regional	51	Surgery performed	14	510	0	0	10	10	0	0	0	0	3	3	0	11	0	Positive	Positive	Not 2010+ Breast	Not 2010+ Breast		N/A not first tumor	N/A not first tumor	77	Dead	2nd of 2 or more primaries	No/Unknown	None/Unknown	No radiation and/or cancer-directed surgery	California excluding SF/SJM/LA - 2000+
Married (including common law)	92	2012	White	C50.1-Central portion of breast	Moderately differentiated; Grade II	Left - origin of primary	Positive histology	I	T1c	N0(i-)	M0	Localized	51	Surgery performed	18	100	0	0	10	20	0	1	1	20	3	3	0	2	0	Positive	Negative	Negative	Her2-/HR+		N/A not first tumor	N/A not first tumor	23	Dead	3rd of 3 or more primaries	No/Unknown	None/Unknown	No radiation and/or cancer-directed surgery	Louisiana - 2000+
Married (including common law)	86	2007	White	C50.1-Central portion of breast	Moderately differentiated; Grade II	Left - origin of primary	Positive histology	IIB	T2	N1mi	M0	Regional	41	Surgery performed	21	100	150	0	10	10	97	987	987	20	5	3	0	98	97	Positive	Positive	Not 2010+ Breast	Not 2010+ Breast		Alive or dead of other cause	Dead (attributable to causes other than this cancer dx)	72	Dead	One primary only	No/Unknown	None/Unknown	No radiation and/or cancer-directed surgery	California excluding SF/SJM/LA - 2000+
Married (including common law)	85	2006	White	C50.0-Nipple	Poorly differentiated; Grade III	Left - origin of primary	Positive histology	IIA	T2	N0	M0	Localized	51	Surgery performed	32	100	0	0	20	20	0	0	0	0	3	3	0	15	0	Negative	Negative	Not 2010+ Breast	Not 2010+ Breast		Alive or dead of other cause	Dead (attributable to causes other than this cancer dx)	10	Dead	One primary only	No/Unknown	None/Unknown	No radiation and/or cancer-directed surgery	California excluding SF/SJM/LA - 2000+
Married (including common law)	84	2005	White	C50.1-Central portion of breast	Poorly differentiated; Grade III	Right - origin of primary	Positive histology	I	T1c	N0	M0	Localized	51	Surgery performed	20	100	0	0	10	10	0	0	0	0	3	3	0	3	0	Positive	Positive	Not 2010+ Breast	Not 2010+ Breast		Alive or dead of other cause	Dead (attributable to causes other than this cancer dx)	76	Dead	One primary only	No/Unknown	None/Unknown	No radiation and/or cancer-directed surgery	California excluding SF/SJM/LA - 2000+
Unknown	84	2005	White	C50.0-Nipple	Moderately differentiated; Grade II	Right - origin of primary	Positive histology	IIA	T2	N0	M0	Localized	40	Surgery performed	40	100	0	0	10	10	0	0	0	0	3	3	0	2	0	Positive	Positive	Not 2010+ Breast	Not 2010+ Breast		N/A not first tumor	N/A not first tumor	26	Dead	2nd of 2 or more primaries	No/Unknown	None/Unknown	No radiation and/or cancer-directed surgery	Connecticut - 1973+
Married (including common law)	85	2006	White	C50.9-Breast, NOS	Moderately differentiated; Grade II	Left - origin of primary	Positive histology	IIA	T2	N0	M0	Localized	41	Surgery performed	27	100	0	0	10	10	0	0	0	0	3	3	0	1	0	Positive	Positive	Not 2010+ Breast	Not 2010+ Breast		Alive or dead of other cause	Dead (attributable to causes other than this cancer dx)	97	Dead	1st of 2 or more primaries	No/Unknown	None/Unknown	No radiation and/or cancer-directed surgery	San Francisco-Oakland SMSA - 1973+
Married (including common law)	86	2006	White	C50.9-Breast, NOS	Moderately differentiated; Grade II	Left - origin of primary	Positive histology	IIB	T2	N1a	M0	Regional	80	Surgery performed	32	100	250	0	10	10	1	987	987	0	3	3	0	9	1	Positive	Positive	Not 2010+ Breast	Not 2010+ Breast		N/A not first tumor	N/A not first tumor	27	Dead	2nd of 2 or more primaries	Yes	None/Unknown	No radiation and/or cancer-directed surgery	San Francisco-Oakland SMSA - 1973+
Married (including common law)	88	2008	Other (American Indian/AK Native, Asian/Pacific Islander)	C50.9-Breast, NOS	Moderately differentiated; Grade II	Right - origin of primary	Positive histology	I	T1c	N0	M0	Localized	40	Surgery performed	15	100	0	0	999	999	0	0	0	50	3	3	0	3	0	Unknown	Unknown	Not 2010+ Breast	Not 2010+ Breast		Dead (attributable to this cancer dx)	Alive or dead due to cancer	1	Dead	One primary only	No/Unknown	None/Unknown	No radiation and/or cancer-directed surgery	California excluding SF/SJM/LA - 2000+
Married (including common law)	88	2009	White	C50.5-Lower-outer quadrant of breast	Well differentiated; Grade I	Right - origin of primary	Positive histology	I	T1c	N0	M0	Localized	40	Surgery performed	18	100	0	0	998	998	0	0	0	0	3	3	0	3	0	Unknown	Unknown	Not 2010+ Breast	Not 2010+ Breast		Alive or dead of other cause	Alive or dead due to cancer	63	Alive	One primary only	No/Unknown	None/Unknown	No radiation and/or cancer-directed surgery	California excluding SF/SJM/LA - 2000+
Married (including common law)	87	2007	White	C50.9-Breast, NOS	Well differentiated; Grade I	Right - origin of primary	Positive histology	I	T1c	N0	M0	Localized	51	Surgery performed	14	100	0	0	10	20	0	0	0	20	3	3	0	20	0	Positive	Negative	Not 2010+ Breast	Not 2010+ Breast		N/A not first tumor	N/A not first tumor	28	Dead	3rd of 3 or more primaries	No/Unknown	None/Unknown	No radiation and/or cancer-directed surgery	New Jersey - 2000+
Divorced	91	2012	White	C50.1-Central portion of breast	Moderately differentiated; Grade II	Right - origin of primary	Positive histology	I	T1c	N0(i-)	M0	Localized	41	Surgery performed	18	100	0	0	10	10	0	1	0	0	3	3	0	2	0	Positive	Positive	Unknown	Unknown		N/A not first tumor	N/A not first tumor	27	Alive	2nd of 2 or more primaries	No/Unknown	None/Unknown	No radiation and/or cancer-directed surgery	California excluding SF/SJM/LA - 2000+
Widowed	87	2007	White	C50.9-Breast, NOS	Poorly differentiated; Grade III	Left - origin of primary	Positive histology	IIA	T2	N0	M0	Localized	42	Surgery performed	23	100	0	0	10	20	98	0	0	0	3	0	0	0	98	Positive	Negative	Not 2010+ Breast	Not 2010+ Breast		N/A not first tumor	N/A not first tumor	56	Dead	2nd of 2 or more primaries	No/Unknown	Beam radiation	Radiation after surgery	Connecticut - 1973+
Single (never married)	86	2006	White	C50.1-Central portion of breast	Moderately differentiated; Grade II	Right - origin of primary	Positive histology	UNK Stage	T4b	N1	MX	Regional	0	Not recommended	50	520	600	99	10	10	98	987	987	987	0	0	9	0	98	Positive	Positive	Not 2010+ Breast	Not 2010+ Breast		Dead (attributable to this cancer dx)	Alive or dead due to cancer	3	Dead	One primary only	No/Unknown	None/Unknown	No radiation and/or cancer-directed surgery	Los Angeles - 1992+
Widowed	87	2007	White	C50.0-Nipple	Well differentiated; Grade I	Left - origin of primary	Positive histology	I	T1c	N0	M0	Regional	41	Surgery performed	13	200	0	0	10	10	98	0	0	0	3	0	0	0	98	Positive	Positive	Not 2010+ Breast	Not 2010+ Breast		Alive or dead of other cause	Dead (attributable to causes other than this cancer dx)	29	Dead	One primary only	No/Unknown	None/Unknown	No radiation and/or cancer-directed surgery	California excluding SF/SJM/LA - 2000+
Married (including common law)	84	2005	White	C50.1-Central portion of breast	Moderately differentiated; Grade II	Right - origin of primary	Positive histology	IIA	T2	N0(i+)	M0	Localized	41	Surgery performed	25	100	50	0	10	10	0	987	987	20	3	3	0	2	0	Positive	Positive	Not 2010+ Breast	Not 2010+ Breast		Alive or dead of other cause	Alive or dead due to cancer	109	Alive	One primary only	No/Unknown	None/Unknown	No radiation and/or cancer-directed surgery	California excluding SF/SJM/LA - 2000+
Unknown	89	2009	White	C50.9-Breast, NOS	Well differentiated; Grade I	Left - origin of primary	Positive histology	UNK Stage	TX	N0	M0	Localized	41	Surgery performed	999	100	0	0	999	999	98	0	0	987	3	0	0	0	98	Unknown	Unknown	Not 2010+ Breast	Not 2010+ Breast		N/A not first tumor	N/A not first tumor	61	Alive	2nd of 2 or more primaries	No/Unknown	None/Unknown	No radiation and/or cancer-directed surgery	Detroit (Metropolitan) - 1973+
Married (including common law)	88	2010	White	C50.9-Breast, NOS	Moderately differentiated; Grade II	Left - origin of primary	Positive histology	IIA	T2	N0	M0	Localized	51	Surgery performed	25	100	0	0	10	10	0	0	0	30	3	3	0	2	0	Positive	Positive	Negative	Her2-/HR+		Alive or dead of other cause	Dead (attributable to causes other than this cancer dx)	58	Dead	One primary only	No/Unknown	None/Unknown	No radiation and/or cancer-directed surgery	Seattle (Puget Sound) - 1974+
Married (including common law)	90	2012	White	C50.1-Central portion of breast	Moderately differentiated; Grade II	Left - origin of primary	Positive histology	IIA	T2	N0	M0	Localized	0	Recommended, unknown if performed	28	100	0	0	10	10	98	0	0	0	1	0	0	0	98	Positive	Positive	Negative	Her2-/HR+		Alive or dead of other cause	Dead (attributable to causes other than this cancer dx)	25	Dead	1st of 2 or more primaries	No/Unknown	None/Unknown	No radiation and/or cancer-directed surgery	New Jersey - 2000+
Married (including common law)	85	2007	White	C50.1-Central portion of breast	Moderately differentiated; Grade II	Left - origin of primary	Positive histology	IIB	T2	N1a	M0	Regional	51	Surgery performed	25	100	250	0	10	10	1	987	987	0	3	3	0	3	1	Positive	Positive	Not 2010+ Breast	Not 2010+ Breast		N/A not first tumor	N/A not first tumor	29	Dead	2nd of 2 or more primaries	No/Unknown	None/Unknown	No radiation and/or cancer-directed surgery	Greater Georgia - 2000+
Single (never married)	83	2005	White	C50.1-Central portion of breast	Moderately differentiated; Grade II	Right - origin of primary	Positive histology	IIA	T2	N0	M0	Localized	51	Surgery performed	24	100	0	0	20	10	0	0	0	0	Blank(s)	Blank(s)	Blank(s)	4	0	Negative	Positive	Not 2010+ Breast	Not 2010+ Breast		Alive or dead of other cause	Dead (attributable to causes other than this cancer dx)	94	Dead	One primary only	Yes	Beam radiation	Radiation after surgery	Iowa - 1973+
Married (including common law)	84	2006	White	C50.9-Breast, NOS	Well differentiated; Grade I	Left - origin of primary	Positive histology	I	T1c	N0	M0	Localized	22	Surgery performed	18	100	0	0	10	10	98	0	0	0	3	0	0	0	98	Positive	Positive	Not 2010+ Breast	Not 2010+ Breast		N/A not first tumor	N/A not first tumor	106	Alive	2nd of 2 or more primaries	No/Unknown	Beam radiation	Radiation after surgery	Connecticut - 1973+
Married (including common law)	83	2005	White	C50.0-Nipple	Moderately differentiated; Grade II	Right - origin of primary	Positive histology	IIA	T2	N0	M0	Localized	51	Surgery performed	40	100	0	0	10	10	0	0	0	0	3	3	0	8	0	Positive	Positive	Not 2010+ Breast	Not 2010+ Breast		Alive or dead of other cause	Dead (attributable to causes other than this cancer dx)	92	Dead	One primary only	No/Unknown	None/Unknown	No radiation and/or cancer-directed surgery	Detroit (Metropolitan) - 1973+
Married (including common law)	87	2009	White	C50.0-Nipple	Moderately differentiated; Grade II	Right - origin of primary	Positive histology	IIA	T2	N0	M0	Regional	40	Surgery performed	40	200	0	0	10	10	98	0	0	0	3	0	0	0	98	Positive	Positive	Not 2010+ Breast	Not 2010+ Breast		Alive or dead of other cause	Dead (attributable to causes other than this cancer dx)	27	Dead	One primary only	Yes	None/Unknown	No radiation and/or cancer-directed surgery	New Mexico - 1973+
Married (including common law)	84	2006	Other (American Indian/AK Native, Asian/Pacific Islander)	C50.1-Central portion of breast	Poorly differentiated; Grade III	Left - origin of primary	Positive histology	IIIB	T4b	N1a	M0	Regional	51	Surgery performed	40	510	250	0	10	30	3	987	987	0	3	3	0	10	3	Positive	Borderline	Not 2010+ Breast	Not 2010+ Breast		Alive or dead of other cause	Dead (attributable to causes other than this cancer dx)	57	Dead	One primary only	No/Unknown	Beam radiation	Radiation after surgery	Los Angeles - 1992+
Widowed	85	2007	White	C50.9-Breast, NOS	Moderately differentiated; Grade II	Left - origin of primary	Positive histology	IIA	T1c	N1a	M0	Regional	40	Surgery performed	20	200	260	0	10	10	1	987	987	0	3	3	0	19	1	Positive	Positive	Not 2010+ Breast	Not 2010+ Breast		N/A not first tumor	N/A not first tumor	35	Dead	2nd of 2 or more primaries	No/Unknown	None/Unknown	No radiation and/or cancer-directed surgery	New Jersey - 2000+
Married (including common law)	86	2008	Unknown	C50.9-Breast, NOS	Poorly differentiated; Grade III	Left - origin of primary	Positive histology	I	T1c	N0(i-)	M0	Localized	41	Surgery performed	16	100	0	0	10	30	0	1	0	0	3	3	0	4	0	Positive	Borderline	Not 2010+ Breast	Not 2010+ Breast		Alive or dead of other cause	Alive or dead due to cancer	81	Alive	One primary only	No/Unknown	None/Unknown	No radiation and/or cancer-directed surgery	Connecticut - 1973+
Single (never married)	86	2008	White	C50.1-Central portion of breast	Moderately differentiated; Grade II	Right - origin of primary	Positive histology	IV	T2	N1a	M1	Distant	51	Surgery performed	35	200	250	44	10	20	1	987	987	0	3	3	0	4	1	Positive	Negative	Not 2010+ Breast	Not 2010+ Breast		Dead (attributable to this cancer dx)	Alive or dead due to cancer	19	Dead	One primary only	No/Unknown	None/Unknown	No radiation and/or cancer-directed surgery	Connecticut - 1973+
Married (including common law)	85	2007	Black	C50.9-Breast, NOS	Unknown	Right - origin of primary	Positive histology	UNK Stage	TX	N0	M0	Localized	0	Recommended but not performed, unknown reason	999	100	0	0	10	10	98	0	0	987	1	0	0	0	98	Positive	Positive	Not 2010+ Breast	Not 2010+ Breast		Alive or dead of other cause	Dead (attributable to causes other than this cancer dx)	42	Dead	One primary only	No/Unknown	None/Unknown	No radiation and/or cancer-directed surgery	Detroit (Metropolitan) - 1973+
Married (including common law)	84	2005	White	C50.1-Central portion of breast	Moderately differentiated; Grade II	Left - origin of primary	Positive histology	IIIA	T2	N2a	M0	Regional	51	Surgery performed	30	300	600	0	10	10	6	987	987	0	Blank(s)	Blank(s)	Blank(s)	6	6	Positive	Positive	Not 2010+ Breast	Not 2010+ Breast		Alive or dead of other cause	Alive or dead due to cancer	116	Alive	One primary only	No/Unknown	Beam radiation	Radiation after surgery	Iowa - 1973+
Widowed	82	2004	White	C50.1-Central portion of breast	Unknown	Right - origin of primary	Positive histology	I	T1b	N0	M0	Localized	50	Surgery performed	9	100	0	0	999	999	98	0	0	987	3	3	0	18	0	Unknown	Unknown	Not 2010+ Breast	Not 2010+ Breast		Alive or dead of other cause	Alive or dead due to cancer	128	Alive	One primary only	No/Unknown	None/Unknown	No radiation and/or cancer-directed surgery	New Mexico - 1973+
Married (including common law)	85	2007	White	C50.9-Breast, NOS	Moderately differentiated; Grade II	Right - origin of primary	Positive histology	IIA	T2	N0	M0	Localized	51	Surgery performed	32	100	0	0	997	997	98	0	0	50	3	3	0	4	0	Unknown	Unknown	Not 2010+ Breast	Not 2010+ Breast		Alive or dead of other cause	Dead (attributable to causes other than this cancer dx)	1	Dead	One primary only	No/Unknown	None/Unknown	No radiation and/or cancer-directed surgery	Louisiana - 2000+
Widowed	84	2006	Black	C50.4-Upper-outer quadrant of breast	Poorly differentiated; Grade III	Left - origin of primary	Positive histology	IV	T2	N0	M1	Distant	22	Surgery performed	30	100	0	44	997	997	98	0	0	0	3	0	0	0	98	Unknown	Unknown	Not 2010+ Breast	Not 2010+ Breast		Alive or dead of other cause	Dead (attributable to causes other than this cancer dx)	10	Dead	One primary only	No/Unknown	None/Unknown	No radiation and/or cancer-directed surgery	Louisiana - 2000+
Widowed	86	2008	White	C50.1-Central portion of breast	Moderately differentiated; Grade II	Left - origin of primary	Positive histology	IIA	T1c	N1a	M0	Regional	51	Surgery performed	17	200	250	0	10	10	3	987	987	0	3	3	0	14	3	Positive	Positive	Not 2010+ Breast	Not 2010+ Breast		Alive or dead of other cause	Dead (attributable to causes other than this cancer dx)	66	Dead	One primary only	No/Unknown	Beam radiation	Radiation after surgery	California excluding SF/SJM/LA - 2000+
Married (including common law)	85	2007	White	C50.1-Central portion of breast	Poorly differentiated; Grade III	Left - origin of primary	Positive histology	I	T1c	N0	M0	Localized	51	Surgery performed	18	100	0	0	10	10	0	0	0	20	3	3	0	3	0	Positive	Positive	Not 2010+ Breast	Not 2010+ Breast		N/A not first tumor	N/A not first tumor	34	Dead	2nd of 2 or more primaries	No/Unknown	None/Unknown	No radiation and/or cancer-directed surgery	California excluding SF/SJM/LA - 2000+
Widowed	92	2013	White	C50.1-Central portion of breast	Moderately differentiated; Grade II	Left - origin of primary	Positive histology	IIA	T2	N0(i-)	M0	Localized	51	Surgery performed	22	100	0	0	10	10	0	1	0	20	3	3	0	8	0	Positive	Positive	Negative	Her2-/HR+		Alive or dead of other cause	Alive or dead due to cancer	0	Alive	One primary only	No/Unknown	None/Unknown	No radiation and/or cancer-directed surgery	California excluding SF/SJM/LA - 2000+
Married (including common law)	86	2008	White	C50.9-Breast, NOS	Poorly differentiated; Grade III	Left - origin of primary	Positive histology	IIIC	T4b	N3a	M0	Regional	51	Surgery performed	30	510	250	0	10	10	11	987	987	0	3	3	0	14	11	Positive	Positive	Not 2010+ Breast	Not 2010+ Breast		N/A not first tumor	N/A not first tumor	15	Dead	2nd of 2 or more primaries	No/Unknown	Beam radiation	Radiation after surgery	Los Angeles - 1992+
Married (including common law)	87	2009	White	C50.1-Central portion of breast	Poorly differentiated; Grade III	Right - origin of primary	Positive histology	IIB	T2	N1a	M0	Regional	41	Surgery performed	25	100	260	0	10	10	1	987	987	20	3	3	0	14	1	Positive	Positive	Not 2010+ Breast	Not 2010+ Breast		N/A not first tumor	N/A not first tumor	65	Alive	2nd of 2 or more primaries	No/Unknown	None/Unknown	No radiation and/or cancer-directed surgery	New Jersey - 2000+
Widowed	86	2008	White	C50.9-Breast, NOS	Moderately differentiated; Grade II	Left - origin of primary	Positive histology	IIA	T2	N0(i-)	M0	Localized	41	Surgery performed	40	100	0	0	10	10	0	1	0	0	3	3	0	2	0	Positive	Positive	Not 2010+ Breast	Not 2010+ Breast		Alive or dead of other cause	Dead (attributable to causes other than this cancer dx)	69	Dead	One primary only	No/Unknown	None/Unknown	No radiation and/or cancer-directed surgery	Connecticut - 1973+
Widowed	88	2009	White	C50.1-Central portion of breast	Moderately differentiated; Grade II	Left - origin of primary	Positive histology	I	T1c	N0(i-)	M0	Localized	41	Surgery performed	19	100	0	0	10	10	0	1	0	0	3	3	0	3	0	Positive	Positive	Not 2010+ Breast	Not 2010+ Breast		Alive or dead of other cause	Alive or dead due to cancer	66	Alive	One primary only	No/Unknown	None/Unknown	No radiation and/or cancer-directed surgery	New Mexico - 1973+
Married (including common law)	82	2004	White	C50.9-Breast, NOS	Moderately differentiated; Grade II	Right - origin of primary	Positive histology	IIIA	T2	N2a	M0	Regional	41	Surgery performed	35	100	600	0	998	998	5	987	987	50	3	3	0	28	5	Unknown	Unknown	Not 2010+ Breast	Not 2010+ Breast		Alive or dead of other cause	Dead (attributable to causes other than this cancer dx)	33	Dead	One primary only	Yes	None/Unknown	No radiation and/or cancer-directed surgery	New Mexico - 1973+
Married (including common law)	84	2005	White	C50.9-Breast, NOS	Moderately differentiated; Grade II	Left - origin of primary	Positive histology	IV	TX	N1	M1	Distant	0	Not recommended	79	999	600	40	10	20	98	987	987	987	Blank(s)	Blank(s)	Blank(s)	0	98	Positive	Negative	Not 2010+ Breast	Not 2010+ Breast		Dead (attributable to this cancer dx)	Alive or dead due to cancer	58	Dead	1st of 2 or more primaries	No/Unknown	None/Unknown	No radiation and/or cancer-directed surgery	Seattle (Puget Sound) - 1974+
Unknown	84	2006	White	C50.9-Breast, NOS	Poorly differentiated; Grade III	Left - origin of primary	Positive histology	IIIC	TX	N3a	M0	Regional	41	Surgery performed	999	300	250	0	10	20	10	987	987	0	3	3	0	15	10	Positive	Negative	Not 2010+ Breast	Not 2010+ Breast		N/A not first tumor	N/A not first tumor	5	Dead	2nd of 2 or more primaries	Yes	None/Unknown	No radiation and/or cancer-directed surgery	New Jersey - 2000+
Married (including common law)	85	2007	White	C50.1-Central portion of breast	Poorly differentiated; Grade III	Right - origin of primary	Positive histology	IIA	T1b	N1a	M0	Regional	50	Surgery performed	7	100	250	0	999	999	2	987	987	0	3	3	0	14	2	Unknown	Unknown	Not 2010+ Breast	Not 2010+ Breast		N/A not first tumor	N/A not first tumor	29	Dead	2nd of 2 or more primaries	No/Unknown	None/Unknown	No radiation and/or cancer-directed surgery	New Jersey - 2000+
Widowed	82	2004	White	C50.9-Breast, NOS	Poorly differentiated; Grade III	Left - origin of primary	Positive histology	I	T1b	N0	M0	Localized	41	Surgery performed	10	100	0	0	10	10	98	0	0	0	3	0	0	0	98	Positive	Positive	Not 2010+ Breast	Not 2010+ Breast		N/A not first tumor	N/A not first tumor	45	Dead	2nd of 2 or more primaries	No/Unknown	None/Unknown	No radiation and/or cancer-directed surgery	Los Angeles - 1992+
Widowed	86	2007	White	C50.9-Breast, NOS	Moderately differentiated; Grade II	Right - origin of primary	Positive histology	IIA	T1c	N1a	M0	Regional	22	Surgery performed	18	100	600	0	10	10	1	987	987	0	3	3	0	2	1	Positive	Positive	Not 2010+ Breast	Not 2010+ Breast		Dead (attributable to this cancer dx)	Alive or dead due to cancer	9	Dead	One primary only	No/Unknown	None/Unknown	No radiation and/or cancer-directed surgery	New Jersey - 2000+
Married (including common law)	89	2010	White	C50.9-Breast, NOS	Unknown	Left - origin of primary	Positive exfoliative cytology, no positive histology	IIB	T2	N1	M0	Regional	0	Not recommended	25	200	600	0	10	10	95	987	987	987	1	1	0	95	95	Positive	Positive	Negative	Her2-/HR+		Alive or dead of other cause	Dead (attributable to causes other than this cancer dx)	25	Dead	One primary only	No/Unknown	None/Unknown	No radiation and/or cancer-directed surgery	New Jersey - 2000+
Widowed	89	2010	White	C50.9-Breast, NOS	Poorly differentiated; Grade III	Left - origin of primary	Positive histology	IIB	T2	N1mi	M0	Regional	41	Surgery performed	22	200	150	0	10	10	1	987	987	0	3	3	0	3	1	Positive	Positive	Unknown	Unknown		Dead (attributable to this cancer dx)	Alive or dead due to cancer	20	Dead	One primary only	No/Unknown	Beam radiation	Radiation after surgery	Detroit (Metropolitan) - 1973+
Widowed	87	2009	White	C50.1-Central portion of breast	Moderately differentiated; Grade II	Left - origin of primary	Positive histology	IIA	T2	N0	M0	Regional	51	Surgery performed	33	200	0	0	10	10	0	0	0	0	3	3	0	26	0	Positive	Positive	Not 2010+ Breast	Not 2010+ Breast		N/A not first tumor	N/A not first tumor	64	Alive	2nd of 2 or more primaries	No/Unknown	None/Unknown	No radiation and/or cancer-directed surgery	Seattle (Puget Sound) - 1974+
Widowed	83	2004	White	C50.9-Breast, NOS	Poorly differentiated; Grade III	Left - origin of primary	Positive histology	IIIB	T4b	N1a	M0	Regional	41	Surgery performed	25	510	260	0	10	10	2	987	987	0	3	3	0	4	2	Positive	Positive	Not 2010+ Breast	Not 2010+ Breast		Dead (attributable to this cancer dx)	Alive or dead due to cancer	49	Dead	One primary only	No/Unknown	Beam radiation	Radiation after surgery	Connecticut - 1973+
Married (including common law)	82	2004	White	C50.9-Breast, NOS	Poorly differentiated; Grade III	Left - origin of primary	Positive histology	IIIB	T4b	N0	M0	Regional	20	Surgery performed	40	510	0	0	10	10	0	0	0	20	3	3	0	8	0	Positive	Positive	Not 2010+ Breast	Not 2010+ Breast		Alive or dead of other cause	Dead (attributable to causes other than this cancer dx)	40	Dead	1st of 2 or more primaries	No/Unknown	None/Unknown	No radiation and/or cancer-directed surgery	Louisiana - 2000+
Divorced	90	2011	White	C50.0-Nipple	Moderately differentiated; Grade II	Right - origin of primary	Positive histology	IIIB	T4b	N0	M0	Regional	40	Surgery performed	12	605	0	0	10	10	98	0	0	20	3	0	0	0	98	Positive	Positive	Positive	Her2+/HR+		N/A not first tumor	N/A not first tumor	2	Dead	2nd of 2 or more primaries	No/Unknown	None/Unknown	No radiation and/or cancer-directed surgery	California excluding SF/SJM/LA - 2000+
Married (including common law)	84	2006	White	C50.9-Breast, NOS	Moderately differentiated; Grade II	Left - origin of primary	Positive histology	IIA	T2	N0	M0	Localized	51	Surgery performed	21	100	0	0	10	10	0	0	0	30	3	3	0	7	0	Positive	Positive	Not 2010+ Breast	Not 2010+ Breast		Alive or dead of other cause	Dead (attributable to causes other than this cancer dx)	59	Dead	One primary only	No/Unknown	None/Unknown	No radiation and/or cancer-directed surgery	San Jose-Monterey - 1992+
Married (including common law)	85	2006	White	C50.0-Nipple	Moderately differentiated; Grade II	Right - origin of primary	Positive histology	IIA	T2	N0	M0	Localized	51	Surgery performed	44	100	0	0	10	10	0	0	0	30	3	0	0	2	0	Positive	Positive	Not 2010+ Breast	Not 2010+ Breast		Alive or dead of other cause	Dead (attributable to causes other than this cancer dx)	43	Dead	1st of 2 or more primaries	No/Unknown	None/Unknown	No radiation and/or cancer-directed surgery	California excluding SF/SJM/LA - 2000+
Widowed	85	2007	White	C50.8-Overlapping lesion of breast	Moderately differentiated; Grade II	Left - origin of primary	Positive histology	I	T1c	N0	M0	Localized	40	Surgery performed	18	100	0	0	10	10	0	0	0	20	3	3	0	1	0	Positive	Positive	Not 2010+ Breast	Not 2010+ Breast		Alive or dead of other cause	Dead (attributable to causes other than this cancer dx)	58	Dead	One primary only	No/Unknown	None/Unknown	No radiation and/or cancer-directed surgery	San Francisco-Oakland SMSA - 1973+
Married (including common law)	84	2005	White	C50.0-Nipple	Moderately differentiated; Grade II	Right - origin of primary	Positive histology	IV	T2	N2a	M1	Distant	51	Surgery performed	35	200	600	44	10	10	6	987	987	0	3	3	0	6	6	Positive	Positive	Not 2010+ Breast	Not 2010+ Breast		Dead (attributable to this cancer dx)	Alive or dead due to cancer	26	Dead	One primary only	No/Unknown	Beam radiation	Radiation after surgery	Utah - 1973+
Married (including common law)	91	2013	White	C50.9-Breast, NOS	Moderately differentiated; Grade II	Left - origin of primary	Positive histology	UNK Stage	TX	NX	MX	Unknown/unstaged	0	Not recommended	999	999	999	99	10	10	98	987	987	987	9	9	9	0	98	Positive	Positive	Negative	Her2-/HR+		N/A not first tumor	N/A not first tumor	15	Alive	2nd of 2 or more primaries	Yes	None/Unknown	No radiation and/or cancer-directed surgery	Seattle (Puget Sound) - 1974+
Single (never married)	88	2009	White	C50.4-Upper-outer quadrant of breast	Poorly differentiated; Grade III	Right - origin of primary	Positive histology	IIA	T2	N0	M0	Regional	41	Surgery performed	22	200	0	0	10	10	98	0	0	0	3	0	0	0	98	Positive	Positive	Not 2010+ Breast	Not 2010+ Breast		Alive or dead of other cause	Dead (attributable to causes other than this cancer dx)	15	Dead	One primary only	No/Unknown	None/Unknown	No radiation and/or cancer-directed surgery	Iowa - 1973+
Married (including common law)	87	2008	White	C50.9-Breast, NOS	Moderately differentiated; Grade II	Left - origin of primary	Positive histology	I	T1c	N0	M0	Localized	80	Surgery performed	20	100	0	0	10	10	0	0	0	0	3	3	0	1	0	Positive	Positive	Not 2010+ Breast	Not 2010+ Breast		Alive or dead of other cause	Alive or dead due to cancer	74	Alive	One primary only	No/Unknown	None/Unknown	No radiation and/or cancer-directed surgery	California excluding SF/SJM/LA - 2000+
Single (never married)	87	2008	White	C50.1-Central portion of breast	Moderately differentiated; Grade II	Right - origin of primary	Positive histology	I	T1c	N0	M0	Localized	51	Surgery performed	20	100	0	0	10	10	0	0	0	20	3	3	0	6	0	Positive	Positive	Not 2010+ Breast	Not 2010+ Breast		Alive or dead of other cause	Alive or dead due to cancer	74	Alive	One primary only	No/Unknown	None/Unknown	No radiation and/or cancer-directed surgery	Los Angeles - 1992+
Married (including common law)	86	2007	White	C50.9-Breast, NOS	Poorly differentiated; Grade III	Left - origin of primary	Positive histology	IIA	T1c	N1mi	M0	Regional	41	Surgery performed	12	100	130	0	10	10	1	987	987	0	3	3	0	5	1	Positive	Positive	Not 2010+ Breast	Not 2010+ Breast		N/A not first tumor	N/A not first tumor	79	Alive	2nd of 2 or more primaries	No/Unknown	None/Unknown	No radiation and/or cancer-directed surgery	New Jersey - 2000+
Married (including common law)	84	2005	White	C50.1-Central portion of breast	Poorly differentiated; Grade III	Right - origin of primary	Positive histology	IIIA	T1c	N2a	M0	Regional	51	Surgery performed	17	100	250	0	10	10	8	987	987	0	3	3	0	34	8	Positive	Positive	Not 2010+ Breast	Not 2010+ Breast		Alive or dead of other cause	Alive or dead due to cancer	109	Alive	One primary only	No/Unknown	None/Unknown	No radiation and/or cancer-directed surgery	Los Angeles - 1992+
Married (including common law)	85	2007	White	C50.1-Central portion of breast	Moderately differentiated; Grade II	Right - origin of primary	Positive histology	I	T1c	N0	M0	Localized	51	Surgery performed	17	100	0	0	10	10	0	0	0	20	3	3	0	7	0	Positive	Positive	Not 2010+ Breast	Not 2010+ Breast		N/A not first tumor	N/A not first tumor	85	Alive	2nd of 2 or more primaries	No/Unknown	None/Unknown	No radiation and/or cancer-directed surgery	Los Angeles - 1992+
Married (including common law)	90	2011	White	C50.0-Nipple	Moderately differentiated; Grade II	Right - origin of primary	Positive histology	IIB	T2	N1NOS	M0	Regional	51	Surgery performed	40	200	258	0	10	10	1	987	987	0	3	3	0	2	1	Positive	Positive	Negative	Her2-/HR+		N/A not first tumor	N/A not first tumor	2	Dead	2nd of 2 or more primaries	No/Unknown	None/Unknown	No radiation and/or cancer-directed surgery	California excluding SF/SJM/LA - 2000+
Widowed	87	2008	White	C50.1-Central portion of breast	Poorly differentiated; Grade III	Left - origin of primary	Positive histology	IIA	T2	N0	M0	Localized	51	Surgery performed	35	100	0	0	10	10	0	0	0	0	3	3	0	2	0	Positive	Positive	Not 2010+ Breast	Not 2010+ Breast		N/A not first tumor	N/A not first tumor	18	Dead	2nd of 2 or more primaries	No/Unknown	None/Unknown	No radiation and/or cancer-directed surgery	Greater Georgia - 2000+
Single (never married)	86	2007	White	C50.0-Nipple	Moderately differentiated; Grade II	Left - origin of primary	Positive histology	IIA	T2	N0	M0	Localized	22	Surgery performed	25	100	0	0	10	10	98	0	0	0	3	0	0	0	98	Positive	Positive	Not 2010+ Breast	Not 2010+ Breast		Alive or dead of other cause	Dead (attributable to causes other than this cancer dx)	85	Dead	One primary only	No/Unknown	None/Unknown	No radiation and/or cancer-directed surgery	New Jersey - 2000+
Married (including common law)	92	2013	White	C50.2-Upper-inner quadrant of breast	Unknown	Right - origin of primary	Positive histology	IV	TX	N1	M1	Distant	0	Not recommended	7	999	257	50	998	998	98	987	987	0	1	0	0	0	98	Unknown	Unknown	Unknown	Unknown		N/A not first tumor	N/A not first tumor	5	Dead	2nd of 2 or more primaries	No/Unknown	None/Unknown	No radiation and/or cancer-directed surgery	Connecticut - 1973+
Married (including common law)	86	2007	White	C50.1-Central portion of breast	Moderately differentiated; Grade II	Left - origin of primary	Positive histology	I	T1c	N0	M0	Localized	51	Surgery performed	15	100	0	0	10	10	0	0	0	20	3	3	0	11	0	Positive	Positive	Not 2010+ Breast	Not 2010+ Breast		Alive or dead of other cause	Alive or dead due to cancer	85	Alive	One primary only	No/Unknown	None/Unknown	No radiation and/or cancer-directed surgery	Detroit (Metropolitan) - 1973+
Married (including common law)	84	2005	White	C50.1-Central portion of breast	Moderately differentiated; Grade II	Right - origin of primary	Positive histology	IIB	T2	N1mi	M0	Regional	22	Surgery performed	21	100	150	0	10	10	1	987	987	0	3	3	0	8	1	Positive	Positive	Not 2010+ Breast	Not 2010+ Breast		Dead (attributable to this cancer dx)	Alive or dead due to cancer	63	Dead	One primary only	No/Unknown	None/Unknown	No radiation and/or cancer-directed surgery	California excluding SF/SJM/LA - 2000+
Single (never married)	83	2004	White	C50.1-Central portion of breast	Moderately differentiated; Grade II	Left - origin of primary	Positive histology	I	T1b	N0(i-)	M0	Localized	51	Surgery performed	8	100	0	0	10	10	0	1	0	30	3	0	0	3	0	Positive	Positive	Not 2010+ Breast	Not 2010+ Breast		Alive or dead of other cause	Dead (attributable to causes other than this cancer dx)	85	Dead	One primary only	No/Unknown	None/Unknown	No radiation and/or cancer-directed surgery	Los Angeles - 1992+
Married (including common law)	81	2004	White	C50.9-Breast, NOS	Well differentiated; Grade I	Left - origin of primary	Positive histology	I	T1b	N0	M0	Localized	19	Surgery performed	8	100	0	0	10	10	0	0	0	50	3	3	0	1	0	Positive	Positive	Not 2010+ Breast	Not 2010+ Breast		Alive or dead of other cause	Dead (attributable to causes other than this cancer dx)	122	Dead	1st of 2 or more primaries	No/Unknown	Beam radiation	Radiation after surgery	New Jersey - 2000+
Married (including common law)	90	2013	White	C50.1-Central portion of breast	Well differentiated; Grade I	Left - origin of primary	Positive histology	I	T1b	N0	M0	Localized	22	Surgery performed	10	100	0	0	10	10	98	0	0	20	3	0	0	0	98	Positive	Positive	Negative	Her2-/HR+		Dead (attributable to this cancer dx)	Alive or dead due to cancer	18	Dead	One primary only	No/Unknown	None/Unknown	No radiation and/or cancer-directed surgery	California excluding SF/SJM/LA - 2000+
Widowed	89	2011	White	C50.1-Central portion of breast	Poorly differentiated; Grade III	Left - origin of primary	Positive histology	IIIC	T2	N3a	M0	Regional	51	Surgery performed	29	200	250	0	10	10	13	987	987	20	3	3	0	19	14	Positive	Positive	Negative	Her2-/HR+		Alive or dead of other cause	Alive or dead due to cancer	46	Alive	One primary only	No/Unknown	Beam radiation	Radiation after surgery	California excluding SF/SJM/LA - 2000+
Married (including common law)	83	2006	White	C50.5-Lower-outer quadrant of breast	Poorly differentiated; Grade III	Left - origin of primary	Positive histology	IV	T4a	N3c	M1	Distant	41	Surgery performed	40	400	800	40	10	10	98	987	987	0	3	0	0	0	98	Positive	Positive	Not 2010+ Breast	Not 2010+ Breast		N/A not first tumor	N/A not first tumor	42	Dead	2nd of 2 or more primaries	No/Unknown	None/Unknown	No radiation and/or cancer-directed surgery	California excluding SF/SJM/LA - 2000+
Widowed	84	2007	White	C50.5-Lower-outer quadrant of breast	Well differentiated; Grade I	Left - origin of primary	Positive histology	I	T1c	N0(i-)	M0	Localized	41	Surgery performed	19	100	0	0	10	10	0	1	1	0	3	3	0	2	0	Positive	Positive	Not 2010+ Breast	Not 2010+ Breast		Alive or dead of other cause	Alive or dead due to cancer	94	Alive	One primary only	No/Unknown	None/Unknown	No radiation and/or cancer-directed surgery	San Francisco-Oakland SMSA - 1973+
Married (including common law)	83	2006	White	C50.1-Central portion of breast	Moderately differentiated; Grade II	Left - origin of primary	Positive histology	IIB	T2	N1a	M0	Regional	41	Surgery performed	25	100	600	0	10	10	3	987	987	0	3	3	0	4	3	Positive	Positive	Not 2010+ Breast	Not 2010+ Breast		Dead (attributable to this cancer dx)	Alive or dead due to cancer	35	Dead	One primary only	No/Unknown	Beam radiation	Radiation after surgery	San Francisco-Oakland SMSA - 1973+
Married (including common law)	81	2004	White	C50.8-Overlapping lesion of breast	Moderately differentiated; Grade II	Right - origin of primary	Positive histology	I	T1c	N0(i-)	M0	Localized	51	Surgery performed	16	100	0	0	10	10	0	1	1	0	3	3	0	3	0	Positive	Positive	Not 2010+ Breast	Not 2010+ Breast		Alive or dead of other cause	Dead (attributable to causes other than this cancer dx)	64	Dead	One primary only	No/Unknown	None/Unknown	No radiation and/or cancer-directed surgery	Detroit (Metropolitan) - 1973+
Widowed	83	2006	Black	C50.9-Breast, NOS	Moderately differentiated; Grade II	Right - origin of primary	Positive histology	IIIB	T4a	N0	M0	Regional	51	Surgery performed	26	400	0	0	10	10	0	0	0	0	3	3	0	22	0	Positive	Positive	Not 2010+ Breast	Not 2010+ Breast		N/A not first tumor	N/A not first tumor	105	Alive	2nd of 2 or more primaries	No/Unknown	Beam radiation	Radiation after surgery	Kentucky - 2000+
Unknown	82	2005	White	C50.9-Breast, NOS	Moderately differentiated; Grade II	Left - origin of primary	Positive histology	UNK Stage	TX	N1a	M0	Regional	51	Surgery performed	999	200	600	0	999	999	1	987	987	0	3	3	0	3	1	Unknown	Unknown	Not 2010+ Breast	Not 2010+ Breast		Alive or dead of other cause	Dead (attributable to causes other than this cancer dx)	17	Dead	One primary only	No/Unknown	None/Unknown	No radiation and/or cancer-directed surgery	Louisiana - 2000+
Married (including common law)	82	2005	White	C50.9-Breast, NOS	Poorly differentiated; Grade III	Right - origin of primary	Positive histology	IIA	T1c	N1a	M0	Regional	51	Surgery performed	15	100	250	0	10	10	1	987	987	0	3	3	0	12	1	Positive	Positive	Not 2010+ Breast	Not 2010+ Breast		N/A not first tumor	N/A not first tumor	41	Dead	2nd of 2 or more primaries	No/Unknown	None/Unknown	No radiation and/or cancer-directed surgery	Kentucky - 2000+
Married (including common law)	85	2007	White	C50.1-Central portion of breast	Well differentiated; Grade I	Right - origin of primary	Positive histology	IIA	T1c	N1a	M0	Regional	41	Surgery performed	14	200	260	0	10	10	3	987	987	0	3	3	0	6	3	Positive	Positive	Not 2010+ Breast	Not 2010+ Breast		Alive or dead of other cause	Alive or dead due to cancer	92	Alive	One primary only	No/Unknown	Recommended, unknown if administered	No radiation and/or cancer-directed surgery	Los Angeles - 1992+
Married (including common law)	89	2011	White	C50.1-Central portion of breast	Unknown	Right - origin of primary	Positive histology	IIIA	T1c	N2a	M0	Regional	51	Surgery performed	16	200	520	0	10	10	5	987	987	0	3	3	0	14	5	Positive	Positive	Unknown	Unknown		Alive or dead of other cause	Dead (attributable to causes other than this cancer dx)	26	Dead	One primary only	No/Unknown	Beam radiation	Radiation after surgery	Connecticut - 1973+
Single (never married)	88	2011	White	C50.9-Breast, NOS	Poorly differentiated; Grade III	Left - origin of primary	Positive histology	I	T1c	N0	M0	Localized	22	Surgery performed	20	100	0	0	10	10	98	0	0	20	3	0	0	0	98	Positive	Positive	Negative	Her2-/HR+		N/A not first tumor	N/A not first tumor	28	Dead	2nd of 2 or more primaries	No/Unknown	None/Unknown	No radiation and/or cancer-directed surgery	Detroit (Metropolitan) - 1973+
Married (including common law)	82	2005	White	C50.9-Breast, NOS	Well differentiated; Grade I	Left - origin of primary	Positive histology	IIIA	T1c	N2a	M0	Regional	51	Surgery performed	15	200	250	0	10	10	4	987	987	0	3	3	0	8	4	Positive	Positive	Not 2010+ Breast	Not 2010+ Breast		N/A not first tumor	N/A not first tumor	42	Dead	2nd of 2 or more primaries	No/Unknown	Beam radiation	Radiation after surgery	California excluding SF/SJM/LA - 2000+
Married (including common law)	87	2009	White	C50.1-Central portion of breast	Poorly differentiated; Grade III	Left - origin of primary	Positive histology	I	T1c	N0	M0	Localized	41	Surgery performed	17	100	0	0	10	10	0	0	0	0	3	3	0	4	0	Positive	Positive	Not 2010+ Breast	Not 2010+ Breast		Alive or dead of other cause	Alive or dead due to cancer	66	Alive	1st of 2 or more primaries	No/Unknown	None/Unknown	No radiation and/or cancer-directed surgery	Connecticut - 1973+
Widowed	85	2008	White	C50.1-Central portion of breast	Moderately differentiated; Grade II	Left - origin of primary	Positive histology	IIA	T2	N0	M0	Localized	22	Surgery performed	24	100	0	0	10	10	98	0	0	0	3	0	0	0	98	Positive	Positive	Not 2010+ Breast	Not 2010+ Breast		Alive or dead of other cause	Dead (attributable to causes other than this cancer dx)	18	Dead	One primary only	No/Unknown	Beam radiation	Radiation after surgery	Iowa - 1973+
Married (including common law)	84	2007	White	C50.3-Lower-inner quadrant of breast	Poorly differentiated; Grade III	Left - origin of primary	Positive histology	IIIB	T4b	N2a	M0	Regional	51	Surgery performed	55	510	600	0	10	10	6	987	987	0	3	3	0	9	6	Positive	Positive	Not 2010+ Breast	Not 2010+ Breast		Alive or dead of other cause	Alive or dead due to cancer	90	Alive	One primary only	Yes	Beam radiation	Radiation after surgery	New Jersey - 2000+
Unknown	84	2006	White	C50.1-Central portion of breast	Poorly differentiated; Grade III	Left - origin of primary	Positive histology	IIIB	T4b	N0	M0	Regional	51	Surgery performed	14	510	0	0	10	10	0	0	0	20	3	3	0	13	0	Positive	Positive	Not 2010+ Breast	Not 2010+ Breast		N/A not first tumor	N/A not first tumor	98	Dead	2nd of 2 or more primaries	No/Unknown	None/Unknown	No radiation and/or cancer-directed surgery	Los Angeles - 1992+
Widowed	86	2009	Black	C50.8-Overlapping lesion of breast	Moderately differentiated; Grade II	Left - origin of primary	Positive histology	IIA	T2	N0	M0	Localized	0	Not recommended	40	100	0	0	997	997	98	0	0	0	1	0	0	0	98	Unknown	Unknown	Not 2010+ Breast	Not 2010+ Breast		Alive or dead of other cause	Dead (attributable to causes other than this cancer dx)	13	Dead	One primary only	No/Unknown	None/Unknown	No radiation and/or cancer-directed surgery	Louisiana - 2000+
Divorced	86	2008	White	C50.1-Central portion of breast	Poorly differentiated; Grade III	Right - origin of primary	Positive histology	IIA	T2	N0	M0	Localized	40	Surgery performed	40	100	0	0	10	10	98	0	0	30	3	0	0	0	98	Positive	Positive	Not 2010+ Breast	Not 2010+ Breast		Alive or dead of other cause	Dead (attributable to causes other than this cancer dx)	41	Dead	One primary only	No/Unknown	None/Unknown	No radiation and/or cancer-directed surgery	Los Angeles - 1992+
Single (never married)	81	2004	White	C50.8-Overlapping lesion of breast	Poorly differentiated; Grade III	Left - origin of primary	Positive histology	IIA	T2	N0	M0	Localized	51	Surgery performed	35	100	0	0	10	10	0	0	0	0	3	3	0	2	0	Positive	Positive	Not 2010+ Breast	Not 2010+ Breast		Alive or dead of other cause	Dead (attributable to causes other than this cancer dx)	122	Dead	One primary only	No/Unknown	None/Unknown	No radiation and/or cancer-directed surgery	Connecticut - 1973+
Widowed	81	2004	White	C50.1-Central portion of breast	Well differentiated; Grade I	Right - origin of primary	Positive histology	IIA	T2	N0	M0	Localized	41	Surgery performed	28	100	0	0	10	10	98	0	0	0	3	0	0	0	98	Positive	Positive	Not 2010+ Breast	Not 2010+ Breast		N/A not first tumor	N/A not first tumor	7	Dead	2nd of 2 or more primaries	No/Unknown	None/Unknown	No radiation and/or cancer-directed surgery	Utah - 1973+
Married (including common law)	88	2010	White	C50.4-Upper-outer quadrant of breast	Poorly differentiated; Grade III	Right - origin of primary	Positive histology	IIA	T2	N0	M0	Localized	0	Not recommended	21	100	0	0	10	10	98	0	0	987	0	0	0	0	98	Positive	Positive	Borderline	Unknown		Alive or dead of other cause	Dead (attributable to causes other than this cancer dx)	13	Dead	One primary only	No/Unknown	None/Unknown	No radiation and/or cancer-directed surgery	Seattle (Puget Sound) - 1974+
Widowed	88	2010	Black	C50.8-Overlapping lesion of breast	Moderately differentiated; Grade II	Right - origin of primary	Positive histology	I	T1c	N0(i-)	M0	Localized	41	Surgery performed	15	100	0	0	10	10	0	1	0	30	3	3	0	1	0	Positive	Positive	Negative	Her2-/HR+		N/A not first tumor	N/A not first tumor	49	Alive	2nd of 2 or more primaries	No/Unknown	None/Unknown	No radiation and/or cancer-directed surgery	New Jersey - 2000+
Married (including common law)	81	2004	White	C50.1-Central portion of breast	Poorly differentiated; Grade III	Left - origin of primary	Positive histology	UNK Stage	T2	NX	M0	Localized	22	Surgery performed	25	100	999	0	10	10	98	987	987	0	3	9	0	0	98	Positive	Positive	Not 2010+ Breast	Not 2010+ Breast		Alive or dead of other cause	Dead (attributable to causes other than this cancer dx)	68	Dead	One primary only	No/Unknown	Beam radiation	Radiation after surgery	California excluding SF/SJM/LA - 2000+
Widowed	88	2011	White	C50.1-Central portion of breast	Poorly differentiated; Grade III	Right - origin of primary	Positive histology	IIB	T2	N1a	M0	Regional	41	Surgery performed	35	100	250	0	10	10	3	987	987	20	3	3	0	17	3	Positive	Positive	Positive	Her2+/HR+		N/A not first tumor	N/A not first tumor	38	Dead	2nd of 2 or more primaries	No/Unknown	None/Unknown	No radiation and/or cancer-directed surgery	California excluding SF/SJM/LA - 2000+
Married (including common law)	83	2005	White	C50.8-Overlapping lesion of breast	Well differentiated; Grade I	Left - origin of primary	Positive histology	I	T1c	N0	M0	Localized	41	Surgery performed	12	100	0	0	998	998	0	0	0	0	3	3	0	3	0	Unknown	Unknown	Not 2010+ Breast	Not 2010+ Breast		N/A not first tumor	N/A not first tumor	57	Dead	3rd of 3 or more primaries	No/Unknown	None/Unknown	No radiation and/or cancer-directed surgery	Los Angeles - 1992+
Married (including common law)	83	2005	White	C50.8-Overlapping lesion of breast	Well differentiated; Grade I	Right - origin of primary	Positive histology	I	T1c	N0	M0	Localized	41	Surgery performed	17	100	0	0	10	10	0	0	0	0	3	3	0	2	0	Positive	Positive	Not 2010+ Breast	Not 2010+ Breast		N/A not first tumor	N/A not first tumor	57	Dead	2nd of 2 or more primaries	No/Unknown	None/Unknown	No radiation and/or cancer-directed surgery	Los Angeles - 1992+
Single (never married)	91	2013	White	C50.4-Upper-outer quadrant of breast	Well differentiated; Grade I	Right - origin of primary	Positive histology	IIA	T2	N0	M0	Localized	0	Not recommended	25	100	0	0	10	10	98	0	0	0	1	0	0	0	98	Positive	Positive	Negative	Her2-/HR+		Alive or dead of other cause	Alive or dead due to cancer	14	Alive	One primary only	No/Unknown	None/Unknown	No radiation and/or cancer-directed surgery	Los Angeles - 1992+
Married (including common law)	82	2004	White	C50.1-Central portion of breast	Moderately differentiated; Grade II	Left - origin of primary	Positive histology	I	T1c	N0	M0	Localized	50	Surgery performed	15	100	0	0	10	10	0	0	0	30	3	3	0	12	0	Positive	Positive	Not 2010+ Breast	Not 2010+ Breast		Alive or dead of other cause	Dead (attributable to causes other than this cancer dx)	13	Dead	1st of 2 or more primaries	No/Unknown	None/Unknown	No radiation and/or cancer-directed surgery	New Jersey - 2000+
Married (including common law)	85	2007	White	C50.9-Breast, NOS	Moderately differentiated; Grade II	Left - origin of primary	Positive histology	IIIA	T2	N2a	M0	Regional	51	Surgery performed	993	100	260	0	10	10	5	987	987	0	3	3	0	15	5	Positive	Positive	Not 2010+ Breast	Not 2010+ Breast		Dead (attributable to this cancer dx)	Alive or dead due to cancer	30	Dead	One primary only	No/Unknown	None/Unknown	No radiation and/or cancer-directed surgery	New Jersey - 2000+
Married (including common law)	84	2006	White	C50.9-Breast, NOS	Moderately differentiated; Grade II	Right - origin of primary	Positive histology	IIA	T2	N0(i-)	M0	Localized	51	Surgery performed	25	100	0	0	10	10	0	1	0	0	3	3	0	1	0	Positive	Positive	Not 2010+ Breast	Not 2010+ Breast		N/A not first tumor	N/A not first tumor	98	Alive	2nd of 2 or more primaries	No/Unknown	None/Unknown	No radiation and/or cancer-directed surgery	Hawaii - 1973+
Single (never married)	86	2008	White	C50.1-Central portion of breast	Moderately differentiated; Grade II	Right - origin of primary	Positive histology	IIA	T2	N0	M0	Localized	41	Surgery performed	43	100	0	0	10	10	0	0	0	0	3	3	0	1	0	Positive	Positive	Not 2010+ Breast	Not 2010+ Breast		Alive or dead of other cause	Dead (attributable to causes other than this cancer dx)	35	Dead	1st of 2 or more primaries	No/Unknown	None/Unknown	No radiation and/or cancer-directed surgery	Seattle (Puget Sound) - 1974+
Widowed	86	2008	White	C50.1-Central portion of breast	Well differentiated; Grade I	Right - origin of primary	Positive histology	IIB	T2	N1a	M0	Regional	50	Surgery performed	27	100	600	0	20	10	1	987	987	0	3	3	0	3	1	Negative	Positive	Not 2010+ Breast	Not 2010+ Breast		Alive or dead of other cause	Dead (attributable to causes other than this cancer dx)	7	Dead	One primary only	No/Unknown	None/Unknown	No radiation and/or cancer-directed surgery	Iowa - 1973+
Married (including common law)	88	2010	White	C50.1-Central portion of breast	Moderately differentiated; Grade II	Right - origin of primary	Positive histology	IIB	T2	N1a	M0	Regional	41	Surgery performed	27	200	250	0	10	10	2	987	987	20	3	3	0	22	2	Positive	Positive	Negative	Her2-/HR+		Alive or dead of other cause	Dead (attributable to causes other than this cancer dx)	18	Dead	One primary only	No/Unknown	None/Unknown	No radiation and/or cancer-directed surgery	California excluding SF/SJM/LA - 2000+
Married (including common law)	88	2010	White	C50.4-Upper-outer quadrant of breast	Well differentiated; Grade I	Left - origin of primary	Positive histology	I	T1c	N0	M0	Localized	51	Surgery performed	12	100	0	0	10	10	0	0	0	0	3	3	0	2	0	Positive	Positive	Negative	Her2-/HR+		Alive or dead of other cause	Alive or dead due to cancer	49	Alive	One primary only	No/Unknown	None/Unknown	No radiation and/or cancer-directed surgery	Louisiana - 2000+
Married (including common law)	88	2010	White	C50.4-Upper-outer quadrant of breast	Moderately differentiated; Grade II	Left - origin of primary	Positive histology	IIA	T1c	N1mi	M0	Regional	41	Surgery performed	17	200	130	0	10	10	1	987	987	0	3	3	0	1	1	Positive	Positive	Negative	Her2-/HR+		Alive or dead of other cause	Alive or dead due to cancer	49	Alive	One primary only	No/Unknown	None/Unknown	No radiation and/or cancer-directed surgery	Los Angeles - 1992+
Married (including common law)	86	2008	Other (American Indian/AK Native, Asian/Pacific Islander)	C50.1-Central portion of breast	Moderately differentiated; Grade II	Left - origin of primary	Positive histology	IV	T2	N0	M1	Distant	41	Surgery performed	35	100	0	44	10	10	98	0	0	0	3	0	0	0	98	Positive	Positive	Not 2010+ Breast	Not 2010+ Breast		Alive or dead of other cause	Dead (attributable to causes other than this cancer dx)	51	Dead	One primary only	No/Unknown	None/Unknown	No radiation and/or cancer-directed surgery	San Jose-Monterey - 1992+
Married (including common law)	86	2009	Black	C50.9-Breast, NOS	Moderately differentiated; Grade II	Left - origin of primary	Positive histology	IIIA	T2	N2a	M0	Regional	50	Surgery performed	25	100	250	0	10	20	6	987	987	20	3	3	0	16	6	Positive	Negative	Not 2010+ Breast	Not 2010+ Breast		Alive or dead of other cause	Dead (attributable to causes other than this cancer dx)	36	Dead	One primary only	No/Unknown	Radiation, NOS method or source not specified	Radiation after surgery	New Jersey - 2000+
Married (including common law)	86	2008	White	C50.0-Nipple	Moderately differentiated; Grade II	Left - origin of primary	Positive histology	IIIB	T4b	N0	M0	Regional	51	Surgery performed	25	510	0	0	10	10	0	0	0	30	3	3	0	9	0	Positive	Positive	Not 2010+ Breast	Not 2010+ Breast		N/A not first tumor	N/A not first tumor	50	Dead	2nd of 2 or more primaries	No/Unknown	Beam radiation	Radiation after surgery	California excluding SF/SJM/LA - 2000+
Married (including common law)	82	2006	White	C50.1-Central portion of breast	Moderately differentiated; Grade II	Left - origin of primary	Positive histology	IIA	T2	N0(i-)	M0	Localized	41	Surgery performed	22	100	0	0	10	10	0	1	0	0	3	3	0	2	0	Positive	Positive	Not 2010+ Breast	Not 2010+ Breast		Alive or dead of other cause	Dead (attributable to causes other than this cancer dx)	51	Dead	One primary only	No/Unknown	None/Unknown	No radiation and/or cancer-directed surgery	California excluding SF/SJM/LA - 2000+
Single (never married)	85	2009	White	C50.1-Central portion of breast	Moderately differentiated; Grade II	Left - origin of primary	Positive histology	IIA	T2	N0	M0	Localized	22	Surgery performed	40	100	0	0	10	10	98	0	0	0	3	0	0	0	98	Positive	Positive	Not 2010+ Breast	Not 2010+ Breast		Alive or dead of other cause	Dead (attributable to causes other than this cancer dx)	29	Dead	One primary only	No/Unknown	None/Unknown	No radiation and/or cancer-directed surgery	Iowa - 1973+
Unknown	88	2012	White	C50.8-Overlapping lesion of breast	Moderately differentiated; Grade II	Right - origin of primary	Positive histology	I	T1c	N0	M0	Localized	40	Surgery performed	15	100	0	0	10	10	0	0	0	20	3	3	0	2	0	Positive	Positive	Negative	Her2-/HR+		Alive or dead of other cause	Alive or dead due to cancer	34	Alive	1st of 2 or more primaries	No/Unknown	None/Unknown	No radiation and/or cancer-directed surgery	San Francisco-Oakland SMSA - 1973+
Married (including common law)	89	2013	White	C50.8-Overlapping lesion of breast	Moderately differentiated; Grade II	Right - origin of primary	Positive histology	IIA	T2	N0	M0	Localized	41	Surgery performed	21	100	0	0	10	10	98	0	0	0	3	0	0	0	98	Positive	Positive	Negative	Her2-/HR+		Alive or dead of other cause	Alive or dead due to cancer	22	Alive	One primary only	No/Unknown	None/Unknown	No radiation and/or cancer-directed surgery	San Francisco-Oakland SMSA - 1973+
Married (including common law)	86	2010	White	C50.9-Breast, NOS	Poorly differentiated; Grade III	Left - origin of primary	Positive histology	IIIA	T2	N2a	M0	Regional	51	Surgery performed	24	100	250	0	10	998	6	987	987	0	3	3	0	17	6	Positive	Unknown	Negative	Her2-/HR+		N/A not first tumor	N/A not first tumor	58	Alive	2nd of 2 or more primaries	No/Unknown	Beam radiation	Radiation after surgery	California excluding SF/SJM/LA - 2000+
Married (including common law)	89	2012	White	C50.1-Central portion of breast	Moderately differentiated; Grade II	Right - origin of primary	Positive histology	IIA	T2	N0	M0	Regional	40	Surgery performed	23	200	0	0	10	10	98	0	0	0	3	0	0	0	98	Positive	Positive	Negative	Her2-/HR+		Alive or dead of other cause	Alive or dead due to cancer	34	Alive	1st of 2 or more primaries	No/Unknown	Beam radiation	Radiation after surgery	California excluding SF/SJM/LA - 2000+
Married (including common law)	88	2012	Other (American Indian/AK Native, Asian/Pacific Islander)	C50.5-Lower-outer quadrant of breast	Moderately differentiated; Grade II	Right - origin of primary	Positive histology	I	T1c	N0	M0	Localized	41	Surgery performed	18	100	0	0	10	10	0	0	0	0	6	6	0	2	0	Positive	Positive	Negative	Her2-/HR+		Alive or dead of other cause	Alive or dead due to cancer	34	Alive	One primary only	No/Unknown	None/Unknown	No radiation and/or cancer-directed surgery	San Jose-Monterey - 1992+
Widowed	87	2010	White	C50.1-Central portion of breast	Moderately differentiated; Grade II	Right - origin of primary	Positive histology	IIIB	T4b	N0	M0	Regional	41	Surgery performed	30	512	0	0	10	10	98	0	0	0	3	0	0	0	98	Positive	Positive	Negative	Her2-/HR+		Alive or dead of other cause	Dead (attributable to causes other than this cancer dx)	45	Dead	One primary only	No/Unknown	None/Unknown	No radiation and/or cancer-directed surgery	California excluding SF/SJM/LA - 2000+
Widowed	81	2005	White	C50.0-Nipple	Unknown	Left - origin of primary	Positive histology	I	T1c	N0	M0	Localized	51	Surgery performed	14	100	0	0	999	999	98	0	0	0	3	0	0	0	98	Unknown	Unknown	Not 2010+ Breast	Not 2010+ Breast		Alive or dead of other cause	Dead (attributable to causes other than this cancer dx)	42	Dead	One primary only	No/Unknown	None/Unknown	No radiation and/or cancer-directed surgery	California excluding SF/SJM/LA - 2000+
Married (including common law)	86	2009	White	C50.9-Breast, NOS	Moderately differentiated; Grade II	Right - origin of primary	Positive histology	I	T1c	N0	M0	Localized	41	Surgery performed	16	100	0	0	10	10	0	0	0	0	3	3	0	2	0	Positive	Positive	Not 2010+ Breast	Not 2010+ Breast		Alive or dead of other cause	Alive or dead due to cancer	69	Alive	One primary only	No/Unknown	None/Unknown	No radiation and/or cancer-directed surgery	San Francisco-Oakland SMSA - 1973+
Single (never married)	88	2012	White	C50.2-Upper-inner quadrant of breast	Well differentiated; Grade I	Right - origin of primary	Positive histology	I	T1c	N0	M0	Localized	41	Surgery performed	19	100	0	0	10	10	98	0	0	0	3	3	0	3	0	Positive	Positive	Negative	Her2-/HR+		Alive or dead of other cause	Alive or dead due to cancer	33	Alive	One primary only	No/Unknown	None/Unknown	No radiation and/or cancer-directed surgery	New Mexico - 1973+
Married (including common law)	87	2011	White	C50.9-Breast, NOS	Poorly differentiated; Grade III	Right - origin of primary	Positive histology	UNK Stage	T4b	NX	MX	Regional	0	Not recommended	70	512	999	99	10	20	98	987	987	987	0	9	9	0	98	Positive	Negative	Negative	Her2-/HR+		Alive or dead of other cause	Dead (attributable to causes other than this cancer dx)	37	Dead	One primary only	No/Unknown	None/Unknown	No radiation and/or cancer-directed surgery	Seattle (Puget Sound) - 1974+
Married (including common law)	87	2011	White	C50.4-Upper-outer quadrant of breast	Moderately differentiated; Grade II	Right - origin of primary	Positive histology	IIB	T2	N1mi	M0	Regional	50	Surgery performed	22	100	155	0	10	10	2	987	987	0	3	3	0	22	3	Positive	Positive	Negative	Her2-/HR+		N/A not first tumor	N/A not first tumor	25	Dead	2nd of 2 or more primaries	No/Unknown	None/Unknown	No radiation and/or cancer-directed surgery	New Jersey - 2000+
Married (including common law)	83	2007	White	C50.1-Central portion of breast	Well differentiated; Grade I	Right - origin of primary	Positive histology	I	T1c	N0(i-)	M0	Regional	51	Surgery performed	12	200	0	0	10	10	0	1	1	0	3	3	0	5	0	Positive	Positive	Not 2010+ Breast	Not 2010+ Breast		N/A not first tumor	N/A not first tumor	43	Dead	2nd of 2 or more primaries	No/Unknown	None/Unknown	No radiation and/or cancer-directed surgery	Greater Georgia - 2000+
Married (including common law)	86	2010	White	C50.9-Breast, NOS	Poorly differentiated; Grade III	Left - origin of primary	Positive histology	IV	T4a	NX	M1	Distant	41	Surgery performed	45	400	999	10	10	10	98	987	987	0	0	0	0	0	98	Positive	Positive	Positive	Her2+/HR+		Dead (attributable to this cancer dx)	Alive or dead due to cancer	15	Dead	One primary only	No/Unknown	None/Unknown	No radiation and/or cancer-directed surgery	Louisiana - 2000+
Unknown	87	2011	White	C50.8-Overlapping lesion of breast	Well differentiated; Grade I	Right - origin of primary	Positive histology	IIB	T2	N1a	M0	Regional	51	Surgery performed	37	100	250	0	10	10	1	987	987	0	3	3	0	14	1	Positive	Positive	Negative	Her2-/HR+		N/A not first tumor	N/A not first tumor	24	Dead	3rd of 3 or more primaries	Yes	None/Unknown	No radiation and/or cancer-directed surgery	California excluding SF/SJM/LA - 2000+
Married (including common law)	86	2010	White	C50.1-Central portion of breast	Poorly differentiated; Grade III	Left - origin of primary	Positive histology	IIIA	T2	N2a	M0	Regional	51	Surgery performed	37	100	250	0	10	10	5	987	987	0	3	3	0	10	5	Positive	Positive	Negative	Her2-/HR+		N/A not first tumor	N/A not first tumor	53	Dead	2nd of 2 or more primaries	No/Unknown	None/Unknown	No radiation and/or cancer-directed surgery	California excluding SF/SJM/LA - 2000+
Married (including common law)	89	2012	White	C50.5-Lower-outer quadrant of breast	Moderately differentiated; Grade II	Left - origin of primary	Positive histology	IIA	T1c	N1mi	M0	Regional	41	Surgery performed	19	100	150	0	10	10	1	987	987	20	3	3	0	2	1	Positive	Positive	Negative	Her2-/HR+		Alive or dead of other cause	Alive or dead due to cancer	32	Alive	One primary only	No/Unknown	None/Unknown	No radiation and/or cancer-directed surgery	California excluding SF/SJM/LA - 2000+
Widowed	84	2007	White	C50.8-Overlapping lesion of breast	Poorly differentiated; Grade III	Left - origin of primary	Positive histology	I	T1c	N0	M0	Localized	51	Surgery performed	13	100	0	0	10	10	0	0	0	0	3	3	0	2	0	Positive	Positive	Not 2010+ Breast	Not 2010+ Breast		N/A not first tumor	N/A not first tumor	92	Alive	2nd of 2 or more primaries	No/Unknown	None/Unknown	No radiation and/or cancer-directed surgery	California excluding SF/SJM/LA - 2000+
Widowed	84	2007	White	C50.0-Nipple	Moderately differentiated; Grade II	Left - origin of primary	Positive histology	I	T1c	N0	M0	Localized	51	Surgery performed	20	100	0	0	10	10	0	0	0	0	3	3	0	5	0	Positive	Positive	Not 2010+ Breast	Not 2010+ Breast		Alive or dead of other cause	Dead (attributable to causes other than this cancer dx)	14	Dead	1st of 2 or more primaries	No/Unknown	None/Unknown	No radiation and/or cancer-directed surgery	Kentucky - 2000+
Married (including common law)	86	2010	White	C50.8-Overlapping lesion of breast	Poorly differentiated; Grade III	Left - origin of primary	Positive histology	I	T1c	N0	M0	Localized	0	Not recommended	13	100	0	0	10	10	98	0	0	0	3	0	0	0	98	Positive	Positive	Negative	Her2-/HR+		N/A not first tumor	N/A not first tumor	21	Dead	3rd of 3 or more primaries	No/Unknown	None/Unknown	No radiation and/or cancer-directed surgery	New Jersey - 2000+
Widowed	82	2005	White	C50.9-Breast, NOS	Poorly differentiated; Grade III	Right - origin of primary	Positive histology	I	T1c	N0	M0	Localized	41	Surgery performed	16	100	0	0	10	10	0	0	0	0	3	3	0	3	0	Positive	Positive	Not 2010+ Breast	Not 2010+ Breast		Alive or dead of other cause	Alive or dead due to cancer	115	Alive	One primary only	No/Unknown	None/Unknown	No radiation and/or cancer-directed surgery	California excluding SF/SJM/LA - 2000+
Widowed	89	2013	White	C50.1-Central portion of breast	Moderately differentiated; Grade II	Left - origin of primary	Positive histology	I	T1c	N0	M0	Localized	40	Surgery performed	18	100	0	0	10	10	0	0	0	0	3	3	0	2	0	Positive	Positive	Negative	Her2-/HR+		Alive or dead of other cause	Dead (attributable to causes other than this cancer dx)	6	Dead	1st of 2 or more primaries	No/Unknown	None/Unknown	No radiation and/or cancer-directed surgery	California excluding SF/SJM/LA - 2000+
Widowed	81	2004	White	C50.9-Breast, NOS	Unknown	Left - origin of primary	Positive histology	IIA	T1b	N1a	M0	Regional	41	Surgery performed	6	100	600	0	10	10	1	987	987	50	3	3	0	1	1	Positive	Positive	Not 2010+ Breast	Not 2010+ Breast		Alive or dead of other cause	Dead (attributable to causes other than this cancer dx)	25	Dead	1st of 2 or more primaries	Yes	None/Unknown	No radiation and/or cancer-directed surgery	California excluding SF/SJM/LA - 2000+
Married (including common law)	82	2006	White	C50.1-Central portion of breast	Moderately differentiated; Grade II	Right - origin of primary	Positive histology	I	T1c	N0(i-)	M0	Regional	51	Surgery performed	13	200	0	0	10	998	0	1	1	20	3	3	0	20	0	Positive	Unknown	Not 2010+ Breast	Not 2010+ Breast		Alive or dead of other cause	Dead (attributable to causes other than this cancer dx)	68	Dead	One primary only	No/Unknown	None/Unknown	No radiation and/or cancer-directed surgery	Los Angeles - 1992+
Widowed	83	2007	White	C50.2-Upper-inner quadrant of breast	Moderately differentiated; Grade II	Right - origin of primary	Positive histology	IIA	T2	N0	M0	Regional	40	Surgery performed	21	200	0	0	10	10	0	0	0	0	3	3	0	6	0	Positive	Positive	Not 2010+ Breast	Not 2010+ Breast		Alive or dead of other cause	Alive or dead due to cancer	91	Alive	One primary only	No/Unknown	None/Unknown	No radiation and/or cancer-directed surgery	Connecticut - 1973+
Married (including common law)	82	2005	White	C50.0-Nipple	Moderately differentiated; Grade II	Left - origin of primary	Positive histology	IIB	T2	N1a	M0	Regional	41	Surgery performed	22	100	250	0	10	10	2	987	987	0	3	3	0	7	2	Positive	Positive	Not 2010+ Breast	Not 2010+ Breast		Alive or dead of other cause	Dead (attributable to causes other than this cancer dx)	42	Dead	One primary only	No/Unknown	Beam radiation	Radiation after surgery	Atlanta (Metropolitan) - 1975+
Married (including common law)	82	2006	White	C50.1-Central portion of breast	Moderately differentiated; Grade II	Right - origin of primary	Positive histology	IIA	T1c	N1a	M0	Regional	51	Surgery performed	20	100	250	0	10	10	1	987	987	0	3	3	0	22	1	Positive	Positive	Not 2010+ Breast	Not 2010+ Breast		N/A not first tumor	N/A not first tumor	0	Dead	3rd of 3 or more primaries	No/Unknown	None/Unknown	No radiation and/or cancer-directed surgery	Greater Georgia - 2000+
Widowed	85	2008	White	C50.1-Central portion of breast	Poorly differentiated; Grade III	Left - origin of primary	Positive histology	I	T1c	N0(i-)	M0	Localized	51	Surgery performed	18	100	0	0	10	10	0	1	0	20	3	3	0	7	0	Positive	Positive	Not 2010+ Breast	Not 2010+ Breast		Alive or dead of other cause	Alive or dead due to cancer	76	Alive	One primary only	No/Unknown	None/Unknown	No radiation and/or cancer-directed surgery	New Jersey - 2000+
Married (including common law)	88	2011	Black	C50.0-Nipple	Well differentiated; Grade I	Left - origin of primary	Positive histology	IIB	T2	N1mi	M0	Regional	51	Surgery performed	22	200	150	0	10	10	1	987	987	30	3	3	0	12	1	Positive	Positive	Negative	Her2-/HR+		Alive or dead of other cause	Dead (attributable to causes other than this cancer dx)	4	Dead	One primary only	No/Unknown	None/Unknown	No radiation and/or cancer-directed surgery	Los Angeles - 1992+
Married (including common law)	87	2010	White	C50.9-Breast, NOS	Moderately differentiated; Grade II	Left - origin of primary	Positive histology	IIIA	T2	N2NOS	M0	Regional	51	Surgery performed	23	100	620	0	10	10	4	987	987	30	3	3	0	16	4	Positive	Positive	Negative	Her2-/HR+		N/A not first tumor	N/A not first tumor	52	Alive	2nd of 2 or more primaries	No/Unknown	None/Unknown	No radiation and/or cancer-directed surgery	New Jersey - 2000+
Married (including common law)	82	2005	Other (American Indian/AK Native, Asian/Pacific Islander)	C50.9-Breast, NOS	Poorly differentiated; Grade III	Right - origin of primary	Positive histology	IIA	T1c	N1a	M0	Regional	80	Surgery performed	18	100	250	0	10	10	1	987	987	20	3	3	0	10	1	Positive	Positive	Not 2010+ Breast	Not 2010+ Breast		N/A not first tumor	N/A not first tumor	30	Dead	3rd of 3 or more primaries	No/Unknown	None/Unknown	No radiation and/or cancer-directed surgery	New Jersey - 2000+
Widowed	85	2009	White	C50.9-Breast, NOS	Poorly differentiated; Grade III	Left - origin of primary	Positive histology	IV	T2	N1a	M1	Distant	51	Surgery performed	37	100	250	40	10	10	1	987	987	0	3	3	0	1	1	Positive	Positive	Not 2010+ Breast	Not 2010+ Breast		N/A not first tumor	N/A not first tumor	23	Dead	2nd of 2 or more primaries	No/Unknown	None/Unknown	No radiation and/or cancer-directed surgery	Detroit (Metropolitan) - 1973+
Married (including common law)	83	2007	White	C50.1-Central portion of breast	Poorly differentiated; Grade III	Left - origin of primary	Positive histology	IIA	T1c	N1a	M0	Regional	50	Surgery performed	15	100	250	0	10	10	1	987	987	0	3	3	0	11	1	Positive	Positive	Not 2010+ Breast	Not 2010+ Breast		Alive or dead of other cause	Alive or dead due to cancer	89	Alive	1st of 2 or more primaries	No/Unknown	None/Unknown	No radiation and/or cancer-directed surgery	New Mexico - 1973+
Widowed	86	2010	Black	C50.1-Central portion of breast	Poorly differentiated; Grade III	Left - origin of primary	Positive histology	IIA	T1c	N1	M0	Regional	22	Surgery performed	19	100	600	0	10	10	98	987	987	50	3	0	0	0	98	Positive	Positive	Negative	Her2-/HR+		N/A not first tumor	N/A not first tumor	53	Alive	2nd of 2 or more primaries	No/Unknown	None/Unknown	No radiation and/or cancer-directed surgery	Connecticut - 1973+
Married (including common law)	82	2005	White	C50.1-Central portion of breast	Well differentiated; Grade I	Right - origin of primary	Positive histology	IIIA	T1c	N2a	M0	Regional	41	Surgery performed	15	100	260	0	10	20	4	987	987	20	3	3	0	11	4	Positive	Negative	Not 2010+ Breast	Not 2010+ Breast		Alive or dead of other cause	Dead (attributable to causes other than this cancer dx)	101	Dead	One primary only	Yes	None/Unknown	No radiation and/or cancer-directed surgery	Connecticut - 1973+
Widowed	82	2006	White	C50.9-Breast, NOS	Moderately differentiated; Grade II	Right - origin of primary	Positive histology	IIIB	T4b	N2a	M0	Regional	51	Surgery performed	60	510	250	0	10	10	5	987	987	0	5	6	0	10	5	Positive	Positive	Not 2010+ Breast	Not 2010+ Breast		N/A not first tumor	N/A not first tumor	88	Dead	2nd of 2 or more primaries	Yes	Beam radiation	Radiation prior to surgery	New Jersey - 2000+
Married (including common law)	83	2006	White	C50.0-Nipple	Unknown	Right - origin of primary	Positive histology	IIA	T1c	N1NOS	M0	Regional	41	Surgery performed	20	100	250	0	999	999	97	987	987	0	3	3	0	98	97	Unknown	Unknown	Not 2010+ Breast	Not 2010+ Breast		Dead (attributable to this cancer dx)	Alive or dead due to cancer	26	Dead	One primary only	No/Unknown	None/Unknown	No radiation and/or cancer-directed surgery	California excluding SF/SJM/LA - 2000+
Married (including common law)	87	2010	White	C50.8-Overlapping lesion of breast	Unknown	Left - origin of primary	Positive histology	IIA	T2	N0(i-)	M0	Localized	40	Surgery performed	25	100	0	0	10	10	98	1	1	20	3	0	0	0	98	Positive	Positive	Negative	Her2-/HR+		N/A not first tumor	N/A not first tumor	52	Alive	2nd of 2 or more primaries	No/Unknown	None/Unknown	No radiation and/or cancer-directed surgery	San Jose-Monterey - 1992+
Married (including common law)	85	2008	White	C50.1-Central portion of breast	Moderately differentiated; Grade II	Right - origin of primary	Positive histology	IIA	T2	N0	M0	Localized	41	Surgery performed	30	100	0	0	10	10	0	0	0	0	3	3	0	5	0	Positive	Positive	Not 2010+ Breast	Not 2010+ Breast		Alive or dead of other cause	Dead (attributable to causes other than this cancer dx)	22	Dead	One primary only	No/Unknown	None/Unknown	No radiation and/or cancer-directed surgery	California excluding SF/SJM/LA - 2000+
Married (including common law)	84	2007	White	C50.0-Nipple	Moderately differentiated; Grade II	Left - origin of primary	Positive histology	I	T1c	N0	M0	Localized	41	Surgery performed	13	100	0	0	10	10	0	0	0	20	3	3	0	3	0	Positive	Positive	Not 2010+ Breast	Not 2010+ Breast		N/A not first tumor	N/A not first tumor	42	Dead	2nd of 2 or more primaries	No/Unknown	None/Unknown	No radiation and/or cancer-directed surgery	California excluding SF/SJM/LA - 2000+
Married (including common law)	80	2004	White	C50.9-Breast, NOS	Unknown	Right - origin of primary	Positive histology	UNK Stage	TX	NX	MX	Unknown/unstaged	0	Recommended but not performed, unknown reason	999	999	999	99	999	999	98	987	987	987	9	9	9	0	98	Unknown	Unknown	Not 2010+ Breast	Not 2010+ Breast		Dead (attributable to this cancer dx)	Alive or dead due to cancer	46	Dead	One primary only	No/Unknown	None/Unknown	No radiation and/or cancer-directed surgery	New Jersey - 2000+
Married (including common law)	81	2004	White	C50.0-Nipple	Moderately differentiated; Grade II	Right - origin of primary	Positive histology	IIA	T2	N0	M0	Localized	41	Surgery performed	30	100	0	0	10	10	0	0	0	50	3	3	0	2	0	Positive	Positive	Not 2010+ Breast	Not 2010+ Breast		Alive or dead of other cause	Dead (attributable to causes other than this cancer dx)	107	Dead	1st of 2 or more primaries	No/Unknown	None/Unknown	No radiation and/or cancer-directed surgery	San Jose-Monterey - 1992+
Widowed	81	2004	White	C50.9-Breast, NOS	Moderately differentiated; Grade II	Right - origin of primary	Positive histology	I	T1c	N0	M0	Localized	22	Surgery performed	12	100	0	0	998	998	98	0	0	0	3	0	0	0	98	Unknown	Unknown	Not 2010+ Breast	Not 2010+ Breast		N/A not first tumor	N/A not first tumor	3	Dead	3rd of 3 or more primaries	No/Unknown	None/Unknown	No radiation and/or cancer-directed surgery	Connecticut - 1973+
Widowed	83	2006	White	C50.1-Central portion of breast	Poorly differentiated; Grade III	Left - origin of primary	Positive histology	IV	T3	N0	M1	Distant	41	Surgery performed	55	100	0	44	10	20	98	0	0	0	3	0	0	0	98	Positive	Negative	Not 2010+ Breast	Not 2010+ Breast		Dead (attributable to this cancer dx)	Alive or dead due to cancer	5	Dead	One primary only	No/Unknown	None/Unknown	No radiation and/or cancer-directed surgery	Detroit (Metropolitan) - 1973+
Widowed	87	2010	White	C50.1-Central portion of breast	Unknown	Left - origin of primary	Positive histology	IIA	T2	N0	M0	Localized	0	Recommended but not performed, patient refused	21	100	0	0	10	20	98	0	0	987	0	0	0	0	98	Positive	Negative	Negative	Her2-/HR+		N/A not first tumor	N/A not first tumor	35	Dead	3rd of 3 or more primaries	No/Unknown	Refused	No radiation and/or cancer-directed surgery	Seattle (Puget Sound) - 1974+
Single (never married)	85	2008	White	C50.8-Overlapping lesion of breast	Moderately differentiated; Grade II	Right - origin of primary	Positive histology	IIB	T2	N1a	M0	Regional	51	Surgery performed	30	100	250	0	10	10	1	987	987	0	3	3	0	7	1	Positive	Positive	Not 2010+ Breast	Not 2010+ Breast		Alive or dead of other cause	Dead (attributable to causes other than this cancer dx)	28	Dead	One primary only	No/Unknown	Beam radiation	Radiation after surgery	New Jersey - 2000+
Married (including common law)	84	2007	Black	C50.1-Central portion of breast	Moderately differentiated; Grade II	Right - origin of primary	Positive histology	IIIB	T4b	N1mi	M0	Regional	40	Surgery performed	15	510	130	0	10	10	1	987	987	0	3	3	0	1	1	Positive	Positive	Not 2010+ Breast	Not 2010+ Breast		Alive or dead of other cause	Alive or dead due to cancer	86	Alive	One primary only	Yes	None/Unknown	No radiation and/or cancer-directed surgery	Louisiana - 2000+
Married (including common law)	81	2004	White	C50.4-Upper-outer quadrant of breast	Poorly differentiated; Grade III	Left - origin of primary	Positive histology	I	T1c	N0	M0	Localized	41	Surgery performed	13	100	0	0	10	20	0	0	0	50	0	3	0	3	0	Positive	Negative	Not 2010+ Breast	Not 2010+ Breast		N/A not first tumor	N/A not first tumor	29	Dead	2nd of 2 or more primaries	No/Unknown	Beam radiation	Radiation after surgery	California excluding SF/SJM/LA - 2000+
Married (including common law)	85	2008	White	C50.1-Central portion of breast	Poorly differentiated; Grade III	Right - origin of primary	Positive histology	IIA	T1c	N1a	M0	Regional	51	Surgery performed	17	100	600	0	10	10	2	987	987	0	3	3	0	6	2	Positive	Positive	Not 2010+ Breast	Not 2010+ Breast		N/A not first tumor	N/A not first tumor	74	Alive	2nd of 2 or more primaries	No/Unknown	None/Unknown	No radiation and/or cancer-directed surgery	Iowa - 1973+
Married (including common law)	83	2006	White	C50.4-Upper-outer quadrant of breast	Moderately differentiated; Grade II	Right - origin of primary	Positive histology	IIA	T1b	N1mi	M0	Regional	41	Surgery performed	9	100	150	0	10	10	1	987	987	20	3	3	0	1	1	Positive	Positive	Not 2010+ Breast	Not 2010+ Breast		N/A not first tumor	N/A not first tumor	98	Alive	2nd of 2 or more primaries	No/Unknown	None/Unknown	No radiation and/or cancer-directed surgery	San Francisco-Oakland SMSA - 1973+
Married (including common law)	89	2012	White	C50.1-Central portion of breast	Moderately differentiated; Grade II	Right - origin of primary	Positive histology	IIA	T2	N0	M0	Regional	40	Surgery performed	25	200	0	0	10	10	98	0	0	20	3	0	0	0	98	Positive	Positive	Negative	Her2-/HR+		Alive or dead of other cause	Alive or dead due to cancer	26	Alive	One primary only	No/Unknown	None/Unknown	No radiation and/or cancer-directed surgery	Connecticut - 1973+
Married (including common law)	82	2005	White	C50.1-Central portion of breast	Well differentiated; Grade I	Left - origin of primary	Positive histology	I	T1c	N0	M0	Localized	22	Surgery performed	13	100	0	0	998	998	98	0	0	30	3	3	0	2	0	Unknown	Unknown	Not 2010+ Breast	Not 2010+ Breast		Alive or dead of other cause	Dead (attributable to causes other than this cancer dx)	73	Dead	One primary only	No/Unknown	None/Unknown	No radiation and/or cancer-directed surgery	New Mexico - 1973+
Married (including common law)	83	2006	White	C50.1-Central portion of breast	Moderately differentiated; Grade II	Right - origin of primary	Positive histology	I	T1c	N0	M0	Regional	23	Surgery performed	20	200	0	0	10	20	98	0	0	0	3	0	0	0	98	Positive	Negative	Not 2010+ Breast	Not 2010+ Breast		Alive or dead of other cause	Dead (attributable to causes other than this cancer dx)	38	Dead	One primary only	No/Unknown	Beam radiation	Radiation after surgery	Detroit (Metropolitan) - 1973+
Widowed	82	2006	White	C50.1-Central portion of breast	Moderately differentiated; Grade II	Left - origin of primary	Positive histology	IIA	T1c	N1a	M0	Regional	51	Surgery performed	16	200	250	0	10	10	1	987	987	0	3	3	0	16	1	Positive	Positive	Not 2010+ Breast	Not 2010+ Breast		Alive or dead of other cause	Dead (attributable to causes other than this cancer dx)	40	Dead	One primary only	No/Unknown	None/Unknown	No radiation and/or cancer-directed surgery	Connecticut - 1973+
Married (including common law)	87	2010	White	C50.9-Breast, NOS	Moderately differentiated; Grade II	Left - origin of primary	Positive histology	I	T1b	N0	M0	Localized	22	Surgery performed	8	100	0	0	10	10	98	0	0	20	1	0	0	0	98	Positive	Positive	Negative	Her2-/HR+		Alive or dead of other cause	Alive or dead due to cancer	49	Alive	One primary only	No/Unknown	None/Unknown	No radiation and/or cancer-directed surgery	Louisiana - 2000+
Widowed	86	2009	White	C50.9-Breast, NOS	Moderately differentiated; Grade II	Right - origin of primary	Positive histology	IIA	T2	N0(i-)	M0	Localized	40	Surgery performed	40	100	0	0	10	10	0	1	1	0	3	3	0	2	0	Positive	Positive	Not 2010+ Breast	Not 2010+ Breast		N/A not first tumor	N/A not first tumor	58	Dead	2nd of 2 or more primaries	No/Unknown	Beam radiation	Radiation after surgery	New Jersey - 2000+
Married (including common law)	82	2005	White	C50.9-Breast, NOS	Moderately differentiated; Grade II	Left - origin of primary	Positive histology	IIIC	T2	N3a	M0	Regional	41	Surgery performed	22	100	600	0	10	20	13	987	987	0	3	3	0	13	13	Positive	Negative	Not 2010+ Breast	Not 2010+ Breast		Alive or dead of other cause	Dead (attributable to causes other than this cancer dx)	106	Dead	One primary only	Yes	None/Unknown	No radiation and/or cancer-directed surgery	Greater Georgia - 2000+
Married (including common law)	84	2008	White	C50.1-Central portion of breast	Moderately differentiated; Grade II	Right - origin of primary	Positive histology	I	T1c	N0	M0	Regional	51	Surgery performed	20	200	0	0	10	10	0	0	0	0	3	3	0	1	0	Positive	Positive	Not 2010+ Breast	Not 2010+ Breast		N/A not first tumor	N/A not first tumor	46	Dead	2nd of 2 or more primaries	No/Unknown	None/Unknown	No radiation and/or cancer-directed surgery	San Francisco-Oakland SMSA - 1973+
Married (including common law)	82	2007	White	C50.1-Central portion of breast	Poorly differentiated; Grade III	Right - origin of primary	Positive histology	IIIC	T2	N3a	M0	Regional	40	Surgery performed	27	100	750	0	10	10	6	987	987	20	3	3	0	21	6	Positive	Positive	Not 2010+ Breast	Not 2010+ Breast		Alive or dead of other cause	Alive or dead due to cancer	95	Alive	One primary only	Yes	Recommended, unknown if administered	No radiation and/or cancer-directed surgery	Atlanta (Metropolitan) - 1975+
Unknown	85	2010	White	C50.1-Central portion of breast	Moderately differentiated; Grade II	Right - origin of primary	Positive histology	IIA	T2	N0(i-)	M0	Regional	50	Surgery performed	22	200	0	0	10	10	98	1	1	0	3	3	0	10	0	Positive	Positive	Unknown	Unknown		Alive or dead of other cause	Dead (attributable to causes other than this cancer dx)	48	Dead	1st of 2 or more primaries	No/Unknown	None/Unknown	No radiation and/or cancer-directed surgery	New Jersey - 2000+
Married (including common law)	83	2008	White	C50.1-Central portion of breast	Well differentiated; Grade I	Right - origin of primary	Positive histology	IIA	T1c	N1mi	M0	Regional	22	Surgery performed	11	100	130	0	10	10	1	987	987	0	3	3	0	9	1	Positive	Positive	Not 2010+ Breast	Not 2010+ Breast		N/A not first tumor	N/A not first tumor	67	Dead	2nd of 2 or more primaries	No/Unknown	Beam radiation	Radiation after surgery	Greater Georgia - 2000+
Married (including common law)	81	2006	White	C50.9-Breast, NOS	Well differentiated; Grade I	Left - origin of primary	Positive histology	UNK Stage	T1c	N0	MX	Localized	51	Surgery performed	12	100	0	99	10	10	0	0	0	0	3	3	9	9	0	Positive	Positive	Not 2010+ Breast	Not 2010+ Breast		Alive or dead of other cause	Dead (attributable to causes other than this cancer dx)	57	Dead	One primary only	No/Unknown	None/Unknown	No radiation and/or cancer-directed surgery	New Jersey - 2000+
Married (including common law)	87	2012	White	C50.0-Nipple	Moderately differentiated; Grade II	Left - origin of primary	Positive histology	I	T1c	N0	M0	Localized	22	Surgery performed	15	100	0	0	10	10	98	0	0	0	3	0	0	0	98	Positive	Positive	Negative	Her2-/HR+		N/A not first tumor	N/A not first tumor	12	Dead	2nd of 2 or more primaries	No/Unknown	None/Unknown	No radiation and/or cancer-directed surgery	Los Angeles - 1992+
Widowed	87	2011	White	C50.1-Central portion of breast	Poorly differentiated; Grade III	Right - origin of primary	Positive histology	IV	T3	N2a	M1	Distant	50	Surgery performed	53	200	250	44	10	10	8	987	987	0	3	3	0	18	8	Positive	Positive	Negative	Her2-/HR+		Dead (attributable to this cancer dx)	Alive or dead due to cancer	22	Dead	One primary only	No/Unknown	Beam radiation	Radiation after surgery	Los Angeles - 1992+
Widowed	86	2011	White	C50.4-Upper-outer quadrant of breast	Moderately differentiated; Grade II	Left - origin of primary	Positive histology	IIB	T3	N0(i-)	M0	Localized	41	Surgery performed	55	100	0	0	10	10	0	1	0	20	3	3	0	2	0	Positive	Positive	Negative	Her2-/HR+		N/A not first tumor	N/A not first tumor	45	Alive	2nd of 2 or more primaries	No/Unknown	None/Unknown	No radiation and/or cancer-directed surgery	Atlanta (Metropolitan) - 1975+
Married (including common law)	85	2010	White	C50.1-Central portion of breast	Poorly differentiated; Grade III	Right - origin of primary	Positive histology	I	T1c	N0	M0	Regional	41	Surgery performed	18	200	0	0	10	10	0	0	0	30	3	3	0	1	0	Positive	Positive	Negative	Her2-/HR+		Alive or dead of other cause	Alive or dead due to cancer	57	Alive	One primary only	No/Unknown	None/Unknown	No radiation and/or cancer-directed surgery	San Francisco-Oakland SMSA - 1973+
Married (including common law)	84	2008	White	C50.2-Upper-inner quadrant of breast	Moderately differentiated; Grade II	Left - origin of primary	Positive histology	IIIA	T1c	N2a	M0	Regional	51	Surgery performed	20	100	260	0	10	10	4	987	987	20	3	3	0	10	4	Positive	Positive	Not 2010+ Breast	Not 2010+ Breast		Alive or dead of other cause	Alive or dead due to cancer	80	Alive	One primary only	No/Unknown	None/Unknown	No radiation and/or cancer-directed surgery	Atlanta (Metropolitan) - 1975+
Married (including common law)	79	2004	Black	C50.1-Central portion of breast	Well differentiated; Grade I	Right - origin of primary	Positive histology	IIB	T2	N1a	M0	Regional	51	Surgery performed	25	100	260	0	10	10	1	987	987	0	3	3	0	25	1	Positive	Positive	Not 2010+ Breast	Not 2010+ Breast		Alive or dead of other cause	Alive or dead due to cancer	127	Alive	One primary only	Yes	None/Unknown	No radiation and/or cancer-directed surgery	California excluding SF/SJM/LA - 2000+
Married (including common law)	81	2006	Black	C50.0-Nipple	Moderately differentiated; Grade II	Left - origin of primary	Positive histology	IIA	T1c	N1a	M0	Regional	51	Surgery performed	16	200	600	0	10	10	2	987	987	50	3	3	0	15	2	Positive	Positive	Not 2010+ Breast	Not 2010+ Breast		N/A not first tumor	N/A not first tumor	76	Dead	2nd of 2 or more primaries	No/Unknown	None/Unknown	No radiation and/or cancer-directed surgery	California excluding SF/SJM/LA - 2000+
Widowed	85	2010	White	C50.0-Nipple	Moderately differentiated; Grade II	Left - origin of primary	Positive histology	IIA	T2	N0(i-)	M0	Localized	41	Surgery performed	23	100	0	0	10	998	0	1	0	30	3	1	1	1	0	Positive	Unknown	Negative	Her2-/HR+		Alive or dead of other cause	Alive or dead due to cancer	56	Alive	One primary only	No/Unknown	None/Unknown	No radiation and/or cancer-directed surgery	Los Angeles - 1992+
Married (including common law)	84	2008	Other (American Indian/AK Native, Asian/Pacific Islander)	C50.0-Nipple	Moderately differentiated; Grade II	Left - origin of primary	Positive histology	IIB	T2	N1a	M0	Regional	51	Surgery performed	30	100	250	0	10	10	1	987	987	0	3	3	0	4	1	Positive	Positive	Not 2010+ Breast	Not 2010+ Breast		Alive or dead of other cause	Alive or dead due to cancer	79	Alive	One primary only	No/Unknown	None/Unknown	No radiation and/or cancer-directed surgery	California excluding SF/SJM/LA - 2000+
Married (including common law)	81	2006	White	C50.8-Overlapping lesion of breast	Well differentiated; Grade I	Left - origin of primary	Positive histology	IIA	T1c	N1a	M0	Regional	51	Surgery performed	18	100	250	0	10	10	1	987	987	20	3	3	0	3	1	Positive	Positive	Not 2010+ Breast	Not 2010+ Breast		Alive or dead of other cause	Dead (attributable to causes other than this cancer dx)	67	Dead	One primary only	No/Unknown	None/Unknown	No radiation and/or cancer-directed surgery	California excluding SF/SJM/LA - 2000+
Married (including common law)	81	2005	White	C50.1-Central portion of breast	Poorly differentiated; Grade III	Right - origin of primary	Positive histology	IIIB	T4b	N2a	M0	Regional	51	Surgery performed	50	520	520	0	10	10	6	987	987	0	3	3	0	6	6	Positive	Positive	Not 2010+ Breast	Not 2010+ Breast		Alive or dead of other cause	Dead (attributable to causes other than this cancer dx)	19	Dead	One primary only	No/Unknown	None/Unknown	No radiation and/or cancer-directed surgery	California excluding SF/SJM/LA - 2000+
Married (including common law)	86	2011	White	C50.8-Overlapping lesion of breast	Well differentiated; Grade I	Left - origin of primary	Positive histology	I	T1a	N0	M0	Localized	41	Surgery performed	3	100	0	0	10	10	98	0	0	20	3	0	0	0	98	Positive	Positive	Negative	Her2-/HR+		Alive or dead of other cause	Dead (attributable to causes other than this cancer dx)	14	Dead	1st of 2 or more primaries	No/Unknown	None/Unknown	No radiation and/or cancer-directed surgery	Los Angeles - 1992+
Unknown	84	2009	White	C50.9-Breast, NOS	Moderately differentiated; Grade II	Left - origin of primary	Positive histology	I	T1b	N0(i-)	M0	Localized	50	Surgery performed	10	100	0	0	998	998	0	1	1	20	3	3	0	13	0	Unknown	Unknown	Not 2010+ Breast	Not 2010+ Breast		Alive or dead of other cause	Alive or dead due to cancer	65	Alive	One primary only	No/Unknown	None/Unknown	No radiation and/or cancer-directed surgery	New Jersey - 2000+
Married (including common law)	87	2012	White	C50.9-Breast, NOS	Well differentiated; Grade I	Left - origin of primary	Positive histology	I	T1c	N0	M0	Localized	40	Surgery performed	16	100	0	0	10	10	0	0	0	20	3	3	0	3	0	Positive	Positive	Negative	Her2-/HR+		Alive or dead of other cause	Alive or dead due to cancer	31	Alive	1st of 2 or more primaries	No/Unknown	None/Unknown	No radiation and/or cancer-directed surgery	Greater Georgia - 2000+
Married (including common law)	87	2011	White	C50.1-Central portion of breast	Moderately differentiated; Grade II	Right - origin of primary	Positive histology	IIA	T2	N0(i-)	M0	Localized	51	Surgery performed	25	100	0	0	10	10	0	1	0	30	3	3	0	5	0	Positive	Positive	Negative	Her2-/HR+		Alive or dead of other cause	Alive or dead due to cancer	43	Alive	One primary only	No/Unknown	None/Unknown	No radiation and/or cancer-directed surgery	Connecticut - 1973+
Married (including common law)	81	2006	White	C50.9-Breast, NOS	Poorly differentiated; Grade III	Right - origin of primary	Positive histology	IIIB	T4a	N2NOS	M0	Regional	51	Surgery performed	50	400	620	0	10	20	4	987	987	0	3	3	0	10	4	Positive	Negative	Not 2010+ Breast	Not 2010+ Breast		Dead (attributable to this cancer dx)	Alive or dead due to cancer	6	Dead	One primary only	Yes	None/Unknown	No radiation and/or cancer-directed surgery	New Jersey - 2000+
Divorced	79	2004	White	C50.9-Breast, NOS	Moderately differentiated; Grade II	Right - origin of primary	Positive histology	IIIB	T4b	N1a	M0	Regional	51	Surgery performed	35	510	250	0	10	10	2	987	987	50	3	3	0	16	2	Positive	Positive	Not 2010+ Breast	Not 2010+ Breast		Alive or dead of other cause	Alive or dead due to cancer	126	Alive	One primary only	Yes	Beam radiation	Radiation after surgery	California excluding SF/SJM/LA - 2000+
Married (including common law)	86	2010	White	C50.1-Central portion of breast	Moderately differentiated; Grade II	Left - origin of primary	Positive histology	I	T1c	N0	M0	Localized	51	Surgery performed	11	100	0	0	10	10	0	0	0	20	3	3	0	5	0	Positive	Positive	Negative	Her2-/HR+		N/A not first tumor	N/A not first tumor	34	Dead	2nd of 2 or more primaries	No/Unknown	None/Unknown	No radiation and/or cancer-directed surgery	California excluding SF/SJM/LA - 2000+
Single (never married)	82	2006	White	C50.9-Breast, NOS	Moderately differentiated; Grade II	Left - origin of primary	Positive histology	IIB	T3	N0	M0	Localized	22	Surgery performed	55	100	0	0	10	10	98	0	0	0	3	0	0	0	98	Positive	Positive	Not 2010+ Breast	Not 2010+ Breast		Alive or dead of other cause	Dead (attributable to causes other than this cancer dx)	13	Dead	One primary only	No/Unknown	None/Unknown	No radiation and/or cancer-directed surgery	San Jose-Monterey - 1992+
Married (including common law)	79	2004	White	C50.9-Breast, NOS	Poorly differentiated; Grade III	Left - origin of primary	Positive histology	IIIB	T4b	N0	M0	Regional	51	Surgery performed	18	510	0	0	10	10	0	0	0	0	3	3	3	3	0	Positive	Positive	Not 2010+ Breast	Not 2010+ Breast		Alive or dead of other cause	Dead (attributable to causes other than this cancer dx)	1	Dead	One primary only	No/Unknown	None/Unknown	No radiation and/or cancer-directed surgery	Greater Georgia - 2000+
Married (including common law)	88	2013	White	C50.1-Central portion of breast	Poorly differentiated; Grade III	Left - origin of primary	Positive histology	IIA	T2	N0(i-)	M0	Localized	41	Surgery performed	31	100	0	0	10	20	0	1	0	0	3	3	0	5	0	Positive	Negative	Negative	Her2-/HR+		Alive or dead of other cause	Alive or dead due to cancer	18	Alive	One primary only	No/Unknown	Beam radiation	Radiation after surgery	Greater Georgia - 2000+
Married (including common law)	88	2013	White	C50.1-Central portion of breast	Moderately differentiated; Grade II	Left - origin of primary	Positive histology	IIB	T2	N1a	M0	Regional	51	Surgery performed	33	100	600	0	10	10	1	987	987	0	3	3	0	12	1	Positive	Positive	Negative	Her2-/HR+		Alive or dead of other cause	Alive or dead due to cancer	17	Alive	One primary only	No/Unknown	None/Unknown	No radiation and/or cancer-directed surgery	California excluding SF/SJM/LA - 2000+
Widowed	79	2004	White	C50.1-Central portion of breast	Moderately differentiated; Grade II	Right - origin of primary	Positive histology	IIA	T2	N0	M0	Regional	51	Surgery performed	21	200	0	0	10	10	0	0	0	20	3	3	0	9	0	Positive	Positive	Not 2010+ Breast	Not 2010+ Breast		Alive or dead of other cause	Alive or dead due to cancer	125	Alive	1st of 2 or more primaries	No/Unknown	None/Unknown	No radiation and/or cancer-directed surgery	California excluding SF/SJM/LA - 2000+
Married (including common law)	83	2007	White	C50.2-Upper-inner quadrant of breast	Moderately differentiated; Grade II	Left - origin of primary	Positive histology	I	T1c	N0(i-)	M0	Regional	51	Surgery performed	20	200	0	0	10	10	0	1	1	0	3	3	0	9	0	Positive	Positive	Not 2010+ Breast	Not 2010+ Breast		Alive or dead of other cause	Dead (attributable to causes other than this cancer dx)	66	Dead	One primary only	No/Unknown	None/Unknown	No radiation and/or cancer-directed surgery	New Jersey - 2000+
Married (including common law)	83	2008	White	C50.1-Central portion of breast	Moderately differentiated; Grade II	Left - origin of primary	Positive histology	IV	T1c	N2a	M1	Distant	51	Surgery performed	20	200	250	40	10	10	5	987	987	0	3	3	3	9	5	Positive	Positive	Not 2010+ Breast	Not 2010+ Breast		N/A not first tumor	N/A not first tumor	4	Dead	2nd of 2 or more primaries	No/Unknown	None/Unknown	No radiation and/or cancer-directed surgery	Louisiana - 2000+
Married (including common law)	80	2004	White	C50.1-Central portion of breast	Poorly differentiated; Grade III	Left - origin of primary	Positive histology	IIIA	T2	N2a	M0	Regional	51	Surgery performed	25	100	250	0	10	10	6	987	987	0	3	3	0	7	6	Positive	Positive	Not 2010+ Breast	Not 2010+ Breast		N/A not first tumor	N/A not first tumor	13	Dead	2nd of 2 or more primaries	No/Unknown	Beam radiation	Radiation after surgery	California excluding SF/SJM/LA - 2000+
Married (including common law)	84	2009	White	C50.9-Breast, NOS	Unknown	Left - origin of primary	Positive histology	IIINOS	TX	N2a	M0	Regional	0	Not recommended	999	100	250	0	10	10	5	987	987	0	0	3	0	7	5	Positive	Positive	Not 2010+ Breast	Not 2010+ Breast		N/A not first tumor	N/A not first tumor	65	Alive	3rd of 3 or more primaries	No/Unknown	Beam radiation	Radiation after surgery	California excluding SF/SJM/LA - 2000+
Widowed	81	2005	White	C50.9-Breast, NOS	Moderately differentiated; Grade II	Right - origin of primary	Positive histology	IIA	T1c	N1a	M0	Regional	41	Surgery performed	20	100	260	0	10	10	1	987	987	20	3	3	0	12	1	Positive	Positive	Not 2010+ Breast	Not 2010+ Breast		N/A not first tumor	N/A not first tumor	22	Dead	2nd of 2 or more primaries	No/Unknown	None/Unknown	No radiation and/or cancer-directed surgery	New Jersey - 2000+
Married (including common law)	83	2008	White	C50.1-Central portion of breast	Moderately differentiated; Grade II	Left - origin of primary	Positive histology	I	T1b	N0	M0	Localized	41	Surgery performed	10	100	0	0	10	10	0	0	0	0	3	3	0	1	0	Positive	Positive	Not 2010+ Breast	Not 2010+ Breast		Alive or dead of other cause	Dead (attributable to causes other than this cancer dx)	51	Dead	One primary only	No/Unknown	None/Unknown	No radiation and/or cancer-directed surgery	Louisiana - 2000+
Widowed	81	2005	White	C50.9-Breast, NOS	Moderately differentiated; Grade II	Left - origin of primary	Positive histology	IIA	T2	N0	M0	Localized	51	Surgery performed	25	100	0	0	10	10	0	0	0	50	3	3	0	15	0	Positive	Positive	Not 2010+ Breast	Not 2010+ Breast		Alive or dead of other cause	Dead (attributable to causes other than this cancer dx)	50	Dead	1st of 2 or more primaries	No/Unknown	None/Unknown	No radiation and/or cancer-directed surgery	Kentucky - 2000+
Married (including common law)	87	2012	White	C50.1-Central portion of breast	Well differentiated; Grade I	Left - origin of primary	Positive histology	I	T1a	N0	M0	Localized	41	Surgery performed	2	100	0	0	10	10	98	0	0	20	3	0	0	0	98	Positive	Positive	Negative	Her2-/HR+		Alive or dead of other cause	Dead (attributable to causes other than this cancer dx)	20	Dead	One primary only	No/Unknown	None/Unknown	No radiation and/or cancer-directed surgery	Atlanta (Metropolitan) - 1975+
Married (including common law)	86	2010	White	C50.0-Nipple	Moderately differentiated; Grade II	Left - origin of primary	Positive histology	I	T1c	N0	M0	Localized	41	Surgery performed	15	100	0	0	10	10	98	0	0	0	3	0	0	0	98	Positive	Positive	Negative	Her2-/HR+		Alive or dead of other cause	Alive or dead due to cancer	32	Alive	One primary only	No/Unknown	None/Unknown	No radiation and/or cancer-directed surgery	Atlanta (Metropolitan) - 1975+
Widowed	89	2013	Black	C50.1-Central portion of breast	Poorly differentiated; Grade III	Left - origin of primary	Positive histology	IIIB	T4b	N1	M0	Regional	0	Not recommended, contraindicated due to other cond; autopsy only (1973-2002)	999	512	255	0	10	10	98	987	987	987	0	0	0	0	98	Positive	Positive	Negative	Her2-/HR+		Alive or dead of other cause	Alive or dead due to cancer	15	Alive	One primary only	No/Unknown	None/Unknown	No radiation and/or cancer-directed surgery	Louisiana - 2000+
Married (including common law)	81	2005	White	C50.1-Central portion of breast	Moderately differentiated; Grade II	Right - origin of primary	Positive histology	IIA	T1c	N1mi	M0	Regional	41	Surgery performed	12	100	150	0	10	10	2	987	987	0	3	3	0	4	2	Positive	Positive	Not 2010+ Breast	Not 2010+ Breast		Alive or dead of other cause	Alive or dead due to cancer	111	Alive	One primary only	No/Unknown	None/Unknown	No radiation and/or cancer-directed surgery	California excluding SF/SJM/LA - 2000+
Married (including common law)	84	2008	White	C50.1-Central portion of breast	Poorly differentiated; Grade III	Left - origin of primary	Positive histology	I	T1c	N0	M0	Localized	41	Surgery performed	13	100	0	0	10	10	0	0	0	20	3	3	0	3	0	Positive	Positive	Not 2010+ Breast	Not 2010+ Breast		N/A not first tumor	N/A not first tumor	73	Alive	2nd of 2 or more primaries	No/Unknown	None/Unknown	No radiation and/or cancer-directed surgery	New Jersey - 2000+
Married (including common law)	89	2013	White	C50.1-Central portion of breast	Poorly differentiated; Grade III	Right - origin of primary	Positive histology	IIIB	T4b	N2a	M0	Regional	51	Surgery performed	24	512	250	0	10	20	9	987	987	20	3	3	0	10	9	Positive	Negative	Negative	Her2-/HR+		N/A not first tumor	N/A not first tumor	15	Alive	2nd of 2 or more primaries	No/Unknown	None/Unknown	No radiation and/or cancer-directed surgery	Los Angeles - 1992+
Divorced	81	2006	White	C50.9-Breast, NOS	Moderately differentiated; Grade II	Right - origin of primary	Positive histology	IIB	T2	N1a	M0	Regional	51	Surgery performed	33	100	260	0	10	10	1	987	987	0	3	3	0	4	1	Positive	Positive	Not 2010+ Breast	Not 2010+ Breast		Dead (attributable to this cancer dx)	Alive or dead due to cancer	10	Dead	One primary only	No/Unknown	Beam radiation	Radiation after surgery	San Francisco-Oakland SMSA - 1973+
Single (never married)	83	2007	Black	C50.0-Nipple	Moderately differentiated; Grade II	Right - origin of primary	Positive histology	UNK Stage	T1c	NX	M0	Localized	41	Surgery performed	20	100	999	0	10	20	98	987	987	0	3	0	0	0	98	Positive	Negative	Not 2010+ Breast	Not 2010+ Breast		N/A not first tumor	N/A not first tumor	11	Dead	2nd of 2 or more primaries	No/Unknown	None/Unknown	No radiation and/or cancer-directed surgery	Detroit (Metropolitan) - 1973+
Widowed	88	2012	White	C50.1-Central portion of breast	Poorly differentiated; Grade III	Right - origin of primary	Positive histology	IIB	T2	N1a	M0	Regional	50	Surgery performed	29	100	250	0	20	20	2	987	987	20	3	3	0	8	2	Negative	Negative	Positive	Her2+/HR-		Alive or dead of other cause	Alive or dead due to cancer	26	Alive	One primary only	No/Unknown	None/Unknown	No radiation and/or cancer-directed surgery	New Mexico - 1973+
Single (never married)	83	2007	White	C50.1-Central portion of breast	Poorly differentiated; Grade III	Left - origin of primary	Positive histology	IIB	T2	N1a	M0	Regional	51	Surgery performed	40	100	250	0	10	10	3	987	987	20	3	3	0	12	3	Positive	Positive	Not 2010+ Breast	Not 2010+ Breast		Alive or dead of other cause	Dead (attributable to causes other than this cancer dx)	60	Dead	One primary only	No/Unknown	None/Unknown	No radiation and/or cancer-directed surgery	California excluding SF/SJM/LA - 2000+
Married (including common law)	79	2004	White	C50.8-Overlapping lesion of breast	Moderately differentiated; Grade II	Right - origin of primary	Positive histology	I	T1c	N0	M0	Localized	51	Surgery performed	14	100	0	0	10	10	0	0	0	0	3	3	0	3	0	Positive	Positive	Not 2010+ Breast	Not 2010+ Breast		Alive or dead of other cause	Alive or dead due to cancer	122	Alive	One primary only	No/Unknown	None/Unknown	No radiation and/or cancer-directed surgery	Kentucky - 2000+
Single (never married)	86	2010	Black	C50.5-Lower-outer quadrant of breast	Well differentiated; Grade I	Left - origin of primary	Positive histology	I	T1c	N0	M0	Localized	41	Surgery performed	15	100	0	0	10	10	0	0	0	0	3	3	0	2	0	Positive	Positive	Negative	Her2-/HR+		Alive or dead of other cause	Alive or dead due to cancer	50	Alive	1st of 2 or more primaries	No/Unknown	None/Unknown	No radiation and/or cancer-directed surgery	Louisiana - 2000+
Married (including common law)	80	2005	White	C50.1-Central portion of breast	Moderately differentiated; Grade II	Right - origin of primary	Positive histology	IIA	T2	N0	M0	Localized	51	Surgery performed	25	100	0	0	10	10	0	0	0	0	3	3	0	10	0	Positive	Positive	Not 2010+ Breast	Not 2010+ Breast		Alive or dead of other cause	Alive or dead due to cancer	110	Alive	One primary only	No/Unknown	None/Unknown	No radiation and/or cancer-directed surgery	Greater Georgia - 2000+
Single (never married)	87	2011	White	C50.4-Upper-outer quadrant of breast	Well differentiated; Grade I	Left - origin of primary	Positive histology	IIA	T2	N0	M0	Localized	22	Surgery performed	35	100	0	0	10	10	98	0	0	20	3	0	0	0	98	Positive	Positive	Negative	Her2-/HR+		Dead (attributable to this cancer dx)	Alive or dead due to cancer	13	Dead	One primary only	No/Unknown	None/Unknown	No radiation and/or cancer-directed surgery	Greater Georgia - 2000+
Widowed	83	2007	Black	C50.9-Breast, NOS	Poorly differentiated; Grade III	Left - origin of primary	Positive histology	IIIB	T4a	N0	M0	Regional	51	Surgery performed	55	400	0	0	20	20	0	0	0	0	3	3	0	20	0	Negative	Negative	Not 2010+ Breast	Not 2010+ Breast		N/A not first tumor	N/A not first tumor	19	Dead	2nd of 2 or more primaries	No/Unknown	None/Unknown	No radiation and/or cancer-directed surgery	Greater Georgia - 2000+
Married (including common law)	80	2004	White	C50.9-Breast, NOS	Poorly differentiated; Grade III	Left - origin of primary	Positive histology	IIA	T2	N0	M0	Localized	41	Surgery performed	23	100	0	0	10	10	0	0	0	0	Blank(s)	Blank(s)	Blank(s)	2	0	Positive	Positive	Not 2010+ Breast	Not 2010+ Breast		Dead (attributable to this cancer dx)	Alive or dead due to cancer	108	Dead	One primary only	No/Unknown	Beam radiation	Radiation after surgery	Seattle (Puget Sound) - 1974+
Single (never married)	83	2008	White	C50.2-Upper-inner quadrant of breast	Moderately differentiated; Grade II	Left - origin of primary	Positive histology	IIIA	T2	N2NOS	M0	Regional	51	Surgery performed	31	200	620	0	10	10	9	987	987	20	3	3	0	27	9	Positive	Positive	Not 2010+ Breast	Not 2010+ Breast		N/A not first tumor	N/A not first tumor	73	Alive	2nd of 2 or more primaries	Yes	Beam radiation	Radiation after surgery	California excluding SF/SJM/LA - 2000+
Married (including common law)	80	2004	White	C50.0-Nipple	Poorly differentiated; Grade III	Right - origin of primary	Positive histology	I	T1c	N0	M0	Regional	51	Surgery performed	18	200	0	0	10	10	0	0	0	0	3	3	0	11	0	Positive	Positive	Not 2010+ Breast	Not 2010+ Breast		N/A not first tumor	N/A not first tumor	46	Dead	3rd of 3 or more primaries	No/Unknown	None/Unknown	No radiation and/or cancer-directed surgery	New Jersey - 2000+
Widowed	89	2013	White	C50.1-Central portion of breast	Moderately differentiated; Grade II	Right - origin of primary	Positive histology	IIA	T2	N0	M0	Localized	22	Surgery performed	26	100	0	0	10	10	0	0	0	0	3	3	0	1	0	Positive	Positive	Negative	Her2-/HR+		Alive or dead of other cause	Alive or dead due to cancer	1	Alive	One primary only	No/Unknown	None/Unknown	No radiation and/or cancer-directed surgery	Los Angeles - 1992+
Widowed	89	2013	White	C50.9-Breast, NOS	Poorly differentiated; Grade III	Left - origin of primary	Positive histology	UNK Stage	T1c	NX	M0	Regional	40	Surgery performed	15	200	999	0	10	10	0	987	987	0	3	0	0	95	0	Positive	Positive	Negative	Her2-/HR+		N/A not first tumor	N/A not first tumor	2	Alive	2nd of 2 or more primaries	No/Unknown	None/Unknown	No radiation and/or cancer-directed surgery	New Jersey - 2000+
Married (including common law)	85	2009	White	C50.1-Central portion of breast	Well differentiated; Grade I	Left - origin of primary	Positive histology	I	T1c	N0	M0	Localized	51	Surgery performed	18	100	0	0	10	10	0	0	0	0	3	3	0	7	0	Positive	Positive	Not 2010+ Breast	Not 2010+ Breast		Alive or dead of other cause	Dead (attributable to causes other than this cancer dx)	27	Dead	1st of 2 or more primaries	No/Unknown	None/Unknown	No radiation and/or cancer-directed surgery	San Jose-Monterey - 1992+
Widowed	84	2009	White	C50.4-Upper-outer quadrant of breast	Moderately differentiated; Grade II	Right - origin of primary	Positive histology	IV	T1b	NX	M1	Distant	0	Not recommended	7	100	999	40	10	10	98	987	987	0	1	0	0	0	98	Positive	Positive	Not 2010+ Breast	Not 2010+ Breast		N/A not first tumor	N/A not first tumor	33	Dead	2nd of 2 or more primaries	No/Unknown	None/Unknown	No radiation and/or cancer-directed surgery	San Jose-Monterey - 1992+
Married (including common law)	86	2010	White	C50.1-Central portion of breast	Poorly differentiated; Grade III	Right - origin of primary	Positive histology	IIIA	T1c	N2a	M0	Regional	51	Surgery performed	17	100	250	0	10	10	5	987	987	20	3	3	0	15	5	Positive	Positive	Negative	Her2-/HR+		Alive or dead of other cause	Alive or dead due to cancer	48	Alive	One primary only	No/Unknown	Beam radiation	Radiation after surgery	Iowa - 1973+
Married (including common law)	85	2009	White	C50.9-Breast, NOS	Moderately differentiated; Grade II	Right - origin of primary	Positive histology	IIIB	T4b	N0	M0	Regional	22	Surgery performed	105	510	0	0	10	10	98	0	0	0	3	0	0	0	98	Positive	Positive	Not 2010+ Breast	Not 2010+ Breast		N/A not first tumor	N/A not first tumor	60	Alive	3rd of 3 or more primaries	No/Unknown	Beam radiation	Radiation after surgery	Detroit (Metropolitan) - 1973+
Single (never married)	83	2009	Other (American Indian/AK Native, Asian/Pacific Islander)	C50.1-Central portion of breast	Moderately differentiated; Grade II	Right - origin of primary	Positive histology	IIIB	T4b	N2a	M0	Regional	51	Surgery performed	34	510	250	0	10	10	5	987	987	0	3	3	0	9	5	Positive	Positive	Not 2010+ Breast	Not 2010+ Breast		Alive or dead of other cause	Dead (attributable to causes other than this cancer dx)	2	Dead	One primary only	No/Unknown	None/Unknown	No radiation and/or cancer-directed surgery	Hawaii - 1973+
Married (including common law)	85	2011	White	C50.9-Breast, NOS	Poorly differentiated; Grade III	Left - origin of primary	Positive histology	I	T1c	N0(i-)	M0	Localized	51	Surgery performed	17	100	0	0	10	10	0	1	0	20	3	3	0	26	0	Positive	Positive	Negative	Her2-/HR+		Dead (attributable to this cancer dx)	Alive or dead due to cancer	22	Dead	One primary only	No/Unknown	None/Unknown	No radiation and/or cancer-directed surgery	Connecticut - 1973+
Widowed	87	2013	White	C50.8-Overlapping lesion of breast	Poorly differentiated; Grade III	Left - origin of primary	Positive histology	IIA	T2	N0(i-)	M0	Localized	41	Surgery performed	35	100	0	0	10	10	0	1	0	20	3	3	0	2	0	Positive	Positive	Negative	Her2-/HR+		N/A not first tumor	N/A not first tumor	22	Alive	2nd of 2 or more primaries	No/Unknown	None/Unknown	No radiation and/or cancer-directed surgery	Connecticut - 1973+
Widowed	84	2009	White	C50.0-Nipple	Well differentiated; Grade I	Right - origin of primary	Positive histology	IIIB	T4b	N0(i-)	M0	Regional	41	Surgery performed	17	510	0	0	999	999	0	1	1	0	3	3	0	2	0	Unknown	Unknown	Not 2010+ Breast	Not 2010+ Breast		Alive or dead of other cause	Alive or dead due to cancer	70	Alive	One primary only	No/Unknown	None/Unknown	No radiation and/or cancer-directed surgery	Los Angeles - 1992+
Married (including common law)	83	2009	Other (American Indian/AK Native, Asian/Pacific Islander)	C50.1-Central portion of breast	Well differentiated; Grade I	Left - origin of primary	Positive histology	I	T1c	N0(i-)	M0	Localized	22	Surgery performed	11	100	0	0	10	10	0	1	0	20	3	3	0	2	0	Positive	Positive	Not 2010+ Breast	Not 2010+ Breast		Alive or dead of other cause	Alive or dead due to cancer	70	Alive	One primary only	No/Unknown	None/Unknown	No radiation and/or cancer-directed surgery	California excluding SF/SJM/LA - 2000+
Married (including common law)	78	2004	Black	C50.1-Central portion of breast	Poorly differentiated; Grade III	Right - origin of primary	Positive histology	IIB	T2	N1a	M0	Regional	51	Surgery performed	24	200	600	0	10	10	1	987	987	0	3	3	0	13	1	Positive	Positive	Not 2010+ Breast	Not 2010+ Breast		Alive or dead of other cause	Dead (attributable to causes other than this cancer dx)	106	Dead	One primary only	No/Unknown	None/Unknown	No radiation and/or cancer-directed surgery	New Jersey - 2000+
Separated	82	2008	White	C50.1-Central portion of breast	Moderately differentiated; Grade II	Left - origin of primary	Positive histology	IIIB	T4b	N1mi	M0	Regional	51	Surgery performed	20	510	130	0	10	10	1	987	987	20	3	3	0	14	1	Positive	Positive	Not 2010+ Breast	Not 2010+ Breast		N/A not first tumor	N/A not first tumor	3	Dead	2nd of 2 or more primaries	Yes	None/Unknown	No radiation and/or cancer-directed surgery	California excluding SF/SJM/LA - 2000+
Married (including common law)	79	2005	White	C50.9-Breast, NOS	Moderately differentiated; Grade II	Right - origin of primary	Positive histology	IIA	T1c	N1a	M0	Regional	41	Surgery performed	11	100	250	0	999	999	3	987	987	20	3	3	0	10	3	Unknown	Unknown	Not 2010+ Breast	Not 2010+ Breast		N/A not first tumor	N/A not first tumor	2	Dead	2nd of 2 or more primaries	No/Unknown	None/Unknown	No radiation and/or cancer-directed surgery	San Jose-Monterey - 1992+
Widowed	84	2010	White	C50.1-Central portion of breast	Poorly differentiated; Grade III	Right - origin of primary	Positive histology	I	T1c	N0(i-)	M0	Regional	21	Surgery performed	20	200	0	0	10	10	0	1	0	0	3	3	0	3	0	Positive	Positive	Borderline	Unknown		Alive or dead of other cause	Alive or dead due to cancer	57	Alive	1st of 2 or more primaries	No/Unknown	None/Unknown	No radiation and/or cancer-directed surgery	California excluding SF/SJM/LA - 2000+
Married (including common law)	83	2009	White	C50.5-Lower-outer quadrant of breast	Moderately differentiated; Grade II	Left - origin of primary	Positive histology	I	T1b	N0	M0	Localized	51	Surgery performed	10	100	0	0	10	10	0	0	0	0	3	3	0	1	0	Positive	Positive	Not 2010+ Breast	Not 2010+ Breast		Alive or dead of other cause	Alive or dead due to cancer	67	Alive	One primary only	Yes	None/Unknown	No radiation and/or cancer-directed surgery	California excluding SF/SJM/LA - 2000+
Married (including common law)	81	2007	Unknown	C50.2-Upper-inner quadrant of breast	Well differentiated; Grade I	Right - origin of primary	Positive histology	I	T1c	N0	M0	Localized	41	Surgery performed	17	100	0	0	10	10	0	0	0	0	3	3	0	2	0	Positive	Positive	Not 2010+ Breast	Not 2010+ Breast		Alive or dead of other cause	Dead (attributable to causes other than this cancer dx)	90	Dead	One primary only	No/Unknown	None/Unknown	No radiation and/or cancer-directed surgery	California excluding SF/SJM/LA - 2000+
Married (including common law)	80	2006	White	C50.4-Upper-outer quadrant of breast	Moderately differentiated; Grade II	Left - origin of primary	Positive histology	IIB	T3	N0	M0	Localized	40	Surgery performed	250	100	0	0	10	10	0	0	0	0	3	3	1	14	0	Positive	Positive	Not 2010+ Breast	Not 2010+ Breast		N/A not first tumor	N/A not first tumor	22	Dead	2nd of 2 or more primaries	No/Unknown	None/Unknown	No radiation and/or cancer-directed surgery	New Jersey - 2000+
Married (including common law)	78	2004	White	C50.1-Central portion of breast	Moderately differentiated; Grade II	Right - origin of primary	Positive histology	IIIA	T2	N2a	M0	Regional	51	Surgery performed	34	100	250	0	10	10	4	987	987	0	3	3	0	5	4	Positive	Positive	Not 2010+ Breast	Not 2010+ Breast		N/A not first tumor	N/A not first tumor	70	Dead	2nd of 2 or more primaries	Yes	Beam radiation	Radiation after surgery	New Jersey - 2000+
Married (including common law)	81	2007	White	C50.9-Breast, NOS	Poorly differentiated; Grade III	Right - origin of primary	Positive histology	IIA	T1b	N1a	M0	Regional	41	Surgery performed	8	200	250	0	10	10	2	987	987	0	3	3	0	18	2	Positive	Positive	Not 2010+ Breast	Not 2010+ Breast		Alive or dead of other cause	Alive or dead due to cancer	93	Alive	One primary only	No/Unknown	None/Unknown	No radiation and/or cancer-directed surgery	New Jersey - 2000+
Widowed	80	2006	White	C50.8-Overlapping lesion of breast	Moderately differentiated; Grade II	Left - origin of primary	Positive histology	IIIA	T1c	N2NOS	M0	Regional	51	Surgery performed	19	100	620	0	10	10	5	987	987	0	3	3	0	15	5	Positive	Positive	Not 2010+ Breast	Not 2010+ Breast		N/A not first tumor	N/A not first tumor	46	Dead	2nd of 2 or more primaries	No/Unknown	None/Unknown	No radiation and/or cancer-directed surgery	New Jersey - 2000+
Married (including common law)	81	2007	White	C50.1-Central portion of breast	Moderately differentiated; Grade II	Left - origin of primary	Positive histology	I	T1c	N0	M0	Regional	20	Surgery performed	12	200	0	0	10	20	98	0	0	30	3	1	0	0	98	Positive	Negative	Not 2010+ Breast	Not 2010+ Breast		N/A not first tumor	N/A not first tumor	93	Alive	2nd of 2 or more primaries	No/Unknown	None/Unknown	No radiation and/or cancer-directed surgery	Los Angeles - 1992+
Single (never married)	85	2011	White	C50.9-Breast, NOS	Poorly differentiated; Grade III	Left - origin of primary	Positive histology	IIB	T2	N1a	M0	Regional	50	Surgery performed	22	100	250	0	999	999	1	987	987	20	3	3	0	4	1	Unknown	Unknown	Borderline	Unknown		Alive or dead of other cause	Dead (attributable to causes other than this cancer dx)	30	Dead	One primary only	No/Unknown	None/Unknown	No radiation and/or cancer-directed surgery	Atlanta (Metropolitan) - 1975+
Divorced	85	2010	Black	C50.4-Upper-outer quadrant of breast	Poorly differentiated; Grade III	Right - origin of primary	Positive histology	I	T1c	N0	M0	Localized	51	Surgery performed	20	100	0	0	10	10	0	0	0	0	3	3	0	12	0	Positive	Positive	Negative	Her2-/HR+		N/A not first tumor	N/A not first tumor	57	Alive	2nd of 2 or more primaries	No/Unknown	None/Unknown	No radiation and/or cancer-directed surgery	Connecticut - 1973+
Single (never married)	82	2008	White	C50.9-Breast, NOS	Moderately differentiated; Grade II	Left - origin of primary	Positive histology	IIA	T1b	N1	M0	Regional	0	Not recommended	10	200	600	0	10	10	1	987	987	0	1	1	0	95	95	Positive	Positive	Not 2010+ Breast	Not 2010+ Breast		Dead (attributable to this cancer dx)	Alive or dead due to cancer	17	Dead	One primary only	No/Unknown	None/Unknown	No radiation and/or cancer-directed surgery	Iowa - 1973+
Married (including common law)	80	2006	White	C50.9-Breast, NOS	Moderately differentiated; Grade II	Right - origin of primary	Positive histology	IIIB	T4b	N1a	M0	Regional	51	Surgery performed	26	510	250	0	10	10	2	987	987	20	3	3	0	10	2	Positive	Positive	Not 2010+ Breast	Not 2010+ Breast		N/A not first tumor	N/A not first tumor	105	Alive	2nd of 2 or more primaries	No/Unknown	Beam radiation	Radiation after surgery	Detroit (Metropolitan) - 1973+
Single (never married)	79	2004	Other (American Indian/AK Native, Asian/Pacific Islander)	C50.8-Overlapping lesion of breast	Well differentiated; Grade I	Right - origin of primary	Positive histology	I	T1c	N0	M0	Localized	51	Surgery performed	11	100	0	0	999	999	0	0	0	0	3	0	0	18	0	Unknown	Unknown	Not 2010+ Breast	Not 2010+ Breast		Alive or dead of other cause	Dead (attributable to causes other than this cancer dx)	121	Dead	1st of 2 or more primaries	No/Unknown	None/Unknown	No radiation and/or cancer-directed surgery	Hawaii - 1973+
Unknown	79	2005	White	C50.0-Nipple	Poorly differentiated; Grade III	Right - origin of primary	Positive histology	IIA	T2	N0	M0	Localized	41	Surgery performed	21	100	0	0	10	10	0	0	0	20	3	3	0	1	0	Positive	Positive	Not 2010+ Breast	Not 2010+ Breast		N/A not first tumor	N/A not first tumor	116	Alive	2nd of 2 or more primaries	No/Unknown	None/Unknown	No radiation and/or cancer-directed surgery	Connecticut - 1973+
Single (never married)	81	2007	White	C50.8-Overlapping lesion of breast	Well differentiated; Grade I	Left - origin of primary	Positive histology	I	T1b	N0	M0	Localized	41	Surgery performed	9	100	0	0	10	10	0	0	0	0	3	3	0	8	0	Positive	Positive	Not 2010+ Breast	Not 2010+ Breast		N/A not first tumor	N/A not first tumor	36	Dead	2nd of 2 or more primaries	No/Unknown	None/Unknown	No radiation and/or cancer-directed surgery	California excluding SF/SJM/LA - 2000+
Married (including common law)	78	2004	White	C50.9-Breast, NOS	Poorly differentiated; Grade III	Right - origin of primary	Positive histology	IIB	T2	N1mi	M0	Regional	51	Surgery performed	25	200	150	0	10	10	1	987	987	0	3	3	0	7	1	Positive	Positive	Not 2010+ Breast	Not 2010+ Breast		N/A not first tumor	N/A not first tumor	33	Dead	2nd of 2 or more primaries	No/Unknown	Beam radiation	Radiation after surgery	New Jersey - 2000+
Married (including common law)	82	2008	Other (American Indian/AK Native, Asian/Pacific Islander)	C50.1-Central portion of breast	Moderately differentiated; Grade II	Left - origin of primary	Positive histology	UNK Stage	T2	N1mi	MX	Regional	51	Surgery performed	25	200	130	99	10	10	2	987	987	30	3	3	0	20	2	Positive	Positive	Not 2010+ Breast	Not 2010+ Breast		Alive or dead of other cause	Dead (attributable to causes other than this cancer dx)	74	Dead	One primary only	No/Unknown	None/Unknown	No radiation and/or cancer-directed surgery	Los Angeles - 1992+
Married (including common law)	85	2011	White	C50.1-Central portion of breast	Poorly differentiated; Grade III	Right - origin of primary	Positive histology	IIA	T2	N0	M0	Regional	41	Surgery performed	22	200	0	0	10	10	98	0	0	0	3	0	0	0	98	Positive	Positive	Negative	Her2-/HR+		Alive or dead of other cause	Alive or dead due to cancer	43	Alive	1st of 2 or more primaries	No/Unknown	Refused	No radiation and/or cancer-directed surgery	Kentucky - 2000+
Widowed	84	2010	White	C50.1-Central portion of breast	Moderately differentiated; Grade II	Left - origin of primary	Positive histology	IIA	T2	N0	M0	Localized	22	Surgery performed	22	100	0	0	10	10	98	0	0	0	3	0	0	0	98	Positive	Positive	Negative	Her2-/HR+		N/A not first tumor	N/A not first tumor	55	Alive	2nd of 2 or more primaries	No/Unknown	None/Unknown	No radiation and/or cancer-directed surgery	San Jose-Monterey - 1992+
Married (including common law)	82	2007	Black	C50.9-Breast, NOS	Poorly differentiated; Grade III	Right - origin of primary	Positive histology	IIB	T3	N0	M0	Localized	51	Surgery performed	77	100	0	0	10	10	0	0	0	0	3	3	0	12	0	Positive	Positive	Not 2010+ Breast	Not 2010+ Breast		Alive or dead of other cause	Dead (attributable to causes other than this cancer dx)	41	Dead	1st of 2 or more primaries	No/Unknown	Beam radiation	Radiation after surgery	Greater Georgia - 2000+
Married (including common law)	80	2005	White	C50.1-Central portion of breast	Poorly differentiated; Grade III	Right - origin of primary	Positive histology	IIA	T2	N0(i+)	M0	Localized	41	Surgery performed	35	100	0	0	10	10	0	2	0	0	Blank(s)	Blank(s)	Blank(s)	98	0	Positive	Positive	Not 2010+ Breast	Not 2010+ Breast		N/A not first tumor	N/A not first tumor	111	Dead	4th of 4 or more primaries	No/Unknown	None/Unknown	No radiation and/or cancer-directed surgery	Seattle (Puget Sound) - 1974+
Widowed	86	2012	Unknown	C50.0-Nipple	Unknown	Left - origin of primary	Positive histology	IIIA	T2	N2a	M0	Regional	41	Surgery performed	24	200	250	0	10	10	5	987	987	20	3	3	0	10	5	Positive	Positive	Negative	Her2-/HR+		N/A not first tumor	N/A not first tumor	29	Alive	2nd of 2 or more primaries	No/Unknown	Beam radiation	Radiation after surgery	Connecticut - 1973+
Widowed	86	2011	White	C50.1-Central portion of breast	Moderately differentiated; Grade II	Left - origin of primary	Positive histology	IIA	T2	N0	M0	Localized	41	Surgery performed	29	100	0	0	10	10	0	0	0	0	3	3	0	1	0	Positive	Positive	Negative	Her2-/HR+		Alive or dead of other cause	Alive or dead due to cancer	41	Alive	One primary only	No/Unknown	None/Unknown	No radiation and/or cancer-directed surgery	Connecticut - 1973+
Unknown	88	2013	White	C50.9-Breast, NOS	Unknown	Right - origin of primary	Positive histology	UNK Stage	TX	NX	MX	Unknown/unstaged	0	Not recommended	999	999	999	99	999	999	98	987	987	987	9	9	9	0	98	Unknown	Unknown	Negative	Unknown		Alive or dead of other cause	Dead (attributable to causes other than this cancer dx)	0	Dead	One primary only	No/Unknown	None/Unknown	No radiation and/or cancer-directed surgery	Seattle (Puget Sound) - 1974+
Married (including common law)	80	2005	White	C50.0-Nipple	Poorly differentiated; Grade III	Right - origin of primary	Positive histology	IIIB	T4b	N1a	M0	Regional	51	Surgery performed	15	510	260	0	10	10	3	987	987	20	3	3	0	4	3	Positive	Positive	Not 2010+ Breast	Not 2010+ Breast		N/A not first tumor	N/A not first tumor	74	Dead	2nd of 2 or more primaries	Yes	None/Unknown	No radiation and/or cancer-directed surgery	New Jersey - 2000+
Unknown	84	2010	White	C50.1-Central portion of breast	Moderately differentiated; Grade II	Right - origin of primary	Positive histology	I	T1c	N0(i+)	M0	Localized	41	Surgery performed	17	100	0	0	10	10	0	2	0	0	3	3	0	3	0	Positive	Positive	Negative	Her2-/HR+		N/A not first tumor	N/A not first tumor	26	Dead	2nd of 2 or more primaries	No/Unknown	None/Unknown	No radiation and/or cancer-directed surgery	New Jersey - 2000+
Widowed	81	2006	Black	C50.1-Central portion of breast	Poorly differentiated; Grade III	Left - origin of primary	Positive histology	IIA	T2	N0	M0	Localized	51	Surgery performed	26	100	0	0	10	10	0	0	0	30	3	3	0	2	0	Positive	Positive	Not 2010+ Breast	Not 2010+ Breast		N/A not first tumor	N/A not first tumor	6	Dead	2nd of 2 or more primaries	No/Unknown	None/Unknown	No radiation and/or cancer-directed surgery	New Jersey - 2000+
Married (including common law)	84	2009	White	C50.9-Breast, NOS	Poorly differentiated; Grade III	Right - origin of primary	Positive histology	IIA	T2	N0	M0	Localized	42	Surgery performed	44	100	0	0	998	998	98	0	0	0	3	0	0	0	98	Unknown	Unknown	Not 2010+ Breast	Not 2010+ Breast		Alive or dead of other cause	Dead (attributable to causes other than this cancer dx)	29	Dead	1st of 2 or more primaries	No/Unknown	None/Unknown	No radiation and/or cancer-directed surgery	New Jersey - 2000+
Married (including common law)	79	2004	White	C50.1-Central portion of breast	Moderately differentiated; Grade II	Right - origin of primary	Positive histology	I	T1b	N0	M0	Localized	22	Surgery performed	9	100	0	0	999	999	98	0	0	0	3	0	0	0	98	Unknown	Unknown	Not 2010+ Breast	Not 2010+ Breast		N/A not first tumor	N/A not first tumor	125	Alive	2nd of 2 or more primaries	No/Unknown	None/Unknown	No radiation and/or cancer-directed surgery	Greater Georgia - 2000+
Married (including common law)	83	2008	White	C50.0-Nipple	Moderately differentiated; Grade II	Right - origin of primary	Positive histology	IIA	T1c	N1a	M0	Regional	51	Surgery performed	16	200	250	0	10	10	1	987	987	0	3	3	0	9	1	Positive	Positive	Not 2010+ Breast	Not 2010+ Breast		Dead (attributable to this cancer dx)	Alive or dead due to cancer	64	Dead	One primary only	No/Unknown	Beam radiation	Radiation after surgery	Connecticut - 1973+
Married (including common law)	79	2004	White	C50.9-Breast, NOS	Poorly differentiated; Grade III	Right - origin of primary	Positive histology	IIIA	T3	N1a	M0	Regional	41	Surgery performed	85	100	260	0	10	20	3	987	987	0	3	3	0	14	3	Positive	Negative	Not 2010+ Breast	Not 2010+ Breast		Alive or dead of other cause	Alive or dead due to cancer	25	Alive	One primary only	Yes	Beam radiation	Radiation after surgery	Connecticut - 1973+
Widowed	81	2006	White	C50.9-Breast, NOS	Poorly differentiated; Grade III	Right - origin of primary	Positive histology	IIA	T2	N0	M0	Localized	51	Surgery performed	25	100	0	0	10	10	0	0	0	30	3	3	0	18	0	Positive	Positive	Not 2010+ Breast	Not 2010+ Breast		Alive or dead of other cause	Dead (attributable to causes other than this cancer dx)	19	Dead	One primary only	No/Unknown	None/Unknown	No radiation and/or cancer-directed surgery	New Jersey - 2000+
Married (including common law)	82	2007	White	C50.4-Upper-outer quadrant of breast	Well differentiated; Grade I	Left - origin of primary	Positive histology	I	T1c	N0	M0	Localized	51	Surgery performed	16	100	0	0	10	10	0	0	0	20	3	3	0	12	0	Positive	Positive	Not 2010+ Breast	Not 2010+ Breast		Alive or dead of other cause	Dead (attributable to causes other than this cancer dx)	4	Dead	One primary only	No/Unknown	None/Unknown	No radiation and/or cancer-directed surgery	California excluding SF/SJM/LA - 2000+
Married (including common law)	79	2004	White	C50.9-Breast, NOS	Moderately differentiated; Grade II	Left - origin of primary	Positive histology	I	T1c	N0	M0	Localized	51	Surgery performed	19	100	0	0	10	10	0	0	0	40	3	3	0	22	0	Positive	Positive	Not 2010+ Breast	Not 2010+ Breast		Alive or dead of other cause	Dead (attributable to causes other than this cancer dx)	46	Dead	1st of 2 or more primaries	No/Unknown	None/Unknown	No radiation and/or cancer-directed surgery	Louisiana - 2000+
Married (including common law)	78	2004	Other (American Indian/AK Native, Asian/Pacific Islander)	C50.9-Breast, NOS	Poorly differentiated; Grade III	Right - origin of primary	Positive histology	IIIB	T4a	N0	M0	Regional	41	Surgery performed	55	400	0	0	10	10	98	0	0	0	3	0	0	0	98	Positive	Positive	Not 2010+ Breast	Not 2010+ Breast		Alive or dead of other cause	Alive or dead due to cancer	10	Alive	One primary only	Yes	Beam radiation	Radiation after surgery	New Jersey - 2000+
Separated	79	2004	White	C50.1-Central portion of breast	Poorly differentiated; Grade III	Left - origin of primary	Positive histology	IIA	T2	N0	M0	Localized	41	Surgery performed	23	100	0	0	10	10	98	0	0	30	3	0	0	0	98	Positive	Positive	Not 2010+ Breast	Not 2010+ Breast		N/A not first tumor	N/A not first tumor	3	Dead	2nd of 2 or more primaries	No/Unknown	None/Unknown	No radiation and/or cancer-directed surgery	California excluding SF/SJM/LA - 2000+
Married (including common law)	80	2005	White	C50.1-Central portion of breast	Moderately differentiated; Grade II	Left - origin of primary	Positive histology	I	T1c	N0(i-)	M0	Regional	51	Surgery performed	15	200	0	0	10	10	0	1	0	0	3	3	0	14	0	Positive	Positive	Not 2010+ Breast	Not 2010+ Breast		Alive or dead of other cause	Alive or dead due to cancer	112	Alive	One primary only	No/Unknown	None/Unknown	No radiation and/or cancer-directed surgery	Los Angeles - 1992+
Married (including common law)	86	2011	White	C50.1-Central portion of breast	Poorly differentiated; Grade III	Left - origin of primary	Positive histology	I	T1c	N0	M0	Regional	51	Surgery performed	15	200	0	0	10	10	0	0	0	0	3	3	0	15	0	Positive	Positive	Negative	Her2-/HR+		Alive or dead of other cause	Alive or dead due to cancer	40	Alive	One primary only	No/Unknown	None/Unknown	No radiation and/or cancer-directed surgery	California excluding SF/SJM/LA - 2000+
Married (including common law)	82	2008	White	C50.1-Central portion of breast	Unknown	Right - origin of primary	Positive histology	I	T1b	N0(i-)	M0	Localized	41	Surgery performed	10	100	0	0	10	10	0	1	0	50	3	3	0	2	0	Positive	Positive	Not 2010+ Breast	Not 2010+ Breast		Alive or dead of other cause	Alive or dead due to cancer	75	Alive	One primary only	No/Unknown	None/Unknown	No radiation and/or cancer-directed surgery	California excluding SF/SJM/LA - 2000+
Married (including common law)	80	2006	Black	C50.1-Central portion of breast	Poorly differentiated; Grade III	Left - origin of primary	Positive histology	IIB	T2	N1a	M0	Regional	41	Surgery performed	40	100	250	0	10	10	3	987	987	30	3	3	0	16	3	Positive	Positive	Not 2010+ Breast	Not 2010+ Breast		N/A not first tumor	N/A not first tumor	99	Alive	2nd of 2 or more primaries	No/Unknown	None/Unknown	No radiation and/or cancer-directed surgery	Kentucky - 2000+
Married (including common law)	81	2006	White	C50.1-Central portion of breast	Well differentiated; Grade I	Left - origin of primary	Positive histology	I	T1c	N0	M0	Localized	23	Surgery performed	12	100	0	0	10	10	0	0	0	0	3	3	0	2	0	Positive	Positive	Not 2010+ Breast	Not 2010+ Breast		N/A not first tumor	N/A not first tumor	99	Alive	2nd of 2 or more primaries	No/Unknown	Beam radiation	Radiation after surgery	San Jose-Monterey - 1992+
Married (including common law)	84	2010	White	C50.9-Breast, NOS	Poorly differentiated; Grade III	Left - origin of primary	Positive histology	IIA	T2	N0	M0	Localized	51	Surgery performed	25	100	0	0	998	998	0	0	0	0	3	3	0	1	0	Unknown	Unknown	Unknown	Unknown		Dead (attributable to this cancer dx)	Alive or dead due to cancer	18	Dead	One primary only	No/Unknown	None/Unknown	No radiation and/or cancer-directed surgery	New Jersey - 2000+
Widowed	78	2004	White	C50.2-Upper-inner quadrant of breast	Moderately differentiated; Grade II	Left - origin of primary	Positive histology	I	T1c	N0	M0	Localized	40	Surgery performed	13	100	0	0	998	998	98	0	0	20	3	0	0	0	98	Unknown	Unknown	Not 2010+ Breast	Not 2010+ Breast		Dead (attributable to this cancer dx)	Alive or dead due to cancer	16	Dead	One primary only	No/Unknown	None/Unknown	No radiation and/or cancer-directed surgery	New Mexico - 1973+
Widowed	86	2011	White	C50.1-Central portion of breast	Poorly differentiated; Grade III	Left - origin of primary	Positive histology	IIA	T2	N0	M0	Localized	41	Surgery performed	38	100	0	0	10	10	98	0	0	20	3	0	0	0	98	Positive	Positive	Borderline	Unknown		N/A not first tumor	N/A not first tumor	39	Alive	2nd of 2 or more primaries	No/Unknown	None/Unknown	No radiation and/or cancer-directed surgery	Connecticut - 1973+
Married (including common law)	84	2009	White	C50.1-Central portion of breast	Well differentiated; Grade I	Right - origin of primary	Positive histology	I	T1c	N0	M0	Localized	41	Surgery performed	11	100	0	0	10	10	0	0	0	0	3	3	0	2	0	Positive	Positive	Not 2010+ Breast	Not 2010+ Breast		Alive or dead of other cause	Alive or dead due to cancer	62	Alive	One primary only	No/Unknown	None/Unknown	No radiation and/or cancer-directed surgery	California excluding SF/SJM/LA - 2000+
Married (including common law)	81	2006	White	C50.1-Central portion of breast	Poorly differentiated; Grade III	Left - origin of primary	Positive histology	IIA	T1c	N1a	M0	Regional	41	Surgery performed	12	100	250	0	10	10	1	987	987	0	3	3	0	10	1	Positive	Positive	Not 2010+ Breast	Not 2010+ Breast		Alive or dead of other cause	Alive or dead due to cancer	98	Alive	1st of 2 or more primaries	No/Unknown	None/Unknown	No radiation and/or cancer-directed surgery	California excluding SF/SJM/LA - 2000+
Married (including common law)	86	2012	Black	C50.1-Central portion of breast	Poorly differentiated; Grade III	Right - origin of primary	Positive histology	I	T1c	N0	M0	Localized	41	Surgery performed	18	100	0	0	10	10	0	0	0	0	3	3	0	1	0	Positive	Positive	Negative	Her2-/HR+		N/A not first tumor	N/A not first tumor	26	Alive	3rd of 3 or more primaries	No/Unknown	None/Unknown	No radiation and/or cancer-directed surgery	Kentucky - 2000+
Married (including common law)	83	2009	Other (American Indian/AK Native, Asian/Pacific Islander)	C50.1-Central portion of breast	Moderately differentiated; Grade II	Right - origin of primary	Positive histology	I	T1c	N0	M0	Localized	80	Surgery performed	15	100	0	0	10	10	98	0	0	0	3	0	0	0	98	Positive	Positive	Not 2010+ Breast	Not 2010+ Breast		Alive or dead of other cause	Dead (attributable to causes other than this cancer dx)	13	Dead	One primary only	No/Unknown	None/Unknown	No radiation and/or cancer-directed surgery	San Jose-Monterey - 1992+
Married (including common law)	86	2011	Other (American Indian/AK Native, Asian/Pacific Islander)	C50.1-Central portion of breast	Moderately differentiated; Grade II	Left - origin of primary	Positive histology	IV	T2	N0	M1	Distant	0	Not recommended	24	100	0	60	10	10	98	0	0	987	1	0	0	0	98	Positive	Positive	Negative	Her2-/HR+		Alive or dead of other cause	Dead (attributable to causes other than this cancer dx)	32	Dead	One primary only	No/Unknown	None/Unknown	No radiation and/or cancer-directed surgery	Atlanta (Metropolitan) - 1975+
Married (including common law)	83	2008	White	C50.1-Central portion of breast	Well differentiated; Grade I	Left - origin of primary	Positive histology	IIA	T1c	N1a	M0	Regional	51	Surgery performed	19	100	600	0	20	20	1	987	987	30	3	3	0	3	1	Negative	Negative	Not 2010+ Breast	Not 2010+ Breast		Alive or dead of other cause	Dead (attributable to causes other than this cancer dx)	18	Dead	One primary only	No/Unknown	None/Unknown	No radiation and/or cancer-directed surgery	California excluding SF/SJM/LA - 2000+
Married (including common law)	79	2004	White	C50.9-Breast, NOS	Unknown	Right - origin of primary	Positive histology	IIA	T2	N0(i-)	M0	Localized	50	Surgery performed	25	100	0	0	997	997	0	1	0	987	3	3	1	22	0	Unknown	Unknown	Not 2010+ Breast	Not 2010+ Breast		Alive or dead of other cause	Dead (attributable to causes other than this cancer dx)	34	Dead	1st of 2 or more primaries	No/Unknown	None/Unknown	No radiation and/or cancer-directed surgery	New Jersey - 2000+
Widowed	79	2004	White	C50.1-Central portion of breast	Poorly differentiated; Grade III	Right - origin of primary	Positive histology	IIA	T2	N0	M0	Regional	22	Surgery performed	35	200	0	0	10	10	98	0	0	30	3	0	0	0	98	Positive	Positive	Not 2010+ Breast	Not 2010+ Breast		Alive or dead of other cause	Dead (attributable to causes other than this cancer dx)	24	Dead	One primary only	No/Unknown	Refused	No radiation and/or cancer-directed surgery	Los Angeles - 1992+
Unknown	79	2004	White	C50.1-Central portion of breast	Poorly differentiated; Grade III	Left - origin of primary	Positive histology	IIA	T2	N0	M0	Localized	51	Surgery performed	993	100	0	0	997	997	0	0	0	0	3	3	0	10	0	Unknown	Unknown	Not 2010+ Breast	Not 2010+ Breast		Alive or dead of other cause	Dead (attributable to causes other than this cancer dx)	31	Dead	One primary only	No/Unknown	None/Unknown	No radiation and/or cancer-directed surgery	Utah - 1973+
Married (including common law)	80	2005	White	C50.1-Central portion of breast	Moderately differentiated; Grade II	Left - origin of primary	Positive histology	IIA	T1c	N1a	M0	Regional	51	Surgery performed	19	100	600	0	10	10	2	987	987	0	Blank(s)	Blank(s)	Blank(s)	6	2	Positive	Positive	Not 2010+ Breast	Not 2010+ Breast		Dead (attributable to this cancer dx)	Alive or dead due to cancer	42	Dead	One primary only	No/Unknown	None/Unknown	No radiation and/or cancer-directed surgery	Iowa - 1973+
Married (including common law)	85	2010	White	C50.1-Central portion of breast	Poorly differentiated; Grade III	Right - origin of primary	Positive histology	I	T1c	N0	M0	Regional	22	Surgery performed	12	200	0	0	10	10	98	0	0	30	3	0	0	0	98	Positive	Positive	Negative	Her2-/HR+		N/A not first tumor	N/A not first tumor	32	Dead	2nd of 2 or more primaries	No/Unknown	None/Unknown	No radiation and/or cancer-directed surgery	Seattle (Puget Sound) - 1974+
Married (including common law)	83	2008	White	C50.1-Central portion of breast	Moderately differentiated; Grade II	Left - origin of primary	Positive histology	I	T1c	N0(i-)	M0	Localized	41	Surgery performed	12	100	0	0	10	10	0	1	0	0	3	3	0	1	0	Positive	Positive	Not 2010+ Breast	Not 2010+ Breast		Alive or dead of other cause	Alive or dead due to cancer	73	Alive	One primary only	No/Unknown	None/Unknown	No radiation and/or cancer-directed surgery	Detroit (Metropolitan) - 1973+
Unknown	85	2011	White	C50.9-Breast, NOS	Moderately differentiated; Grade II	Left - origin of primary	Positive histology	I	T1c	N0(i-)	M0	Localized	41	Surgery performed	14	100	0	0	10	10	0	1	0	0	3	3	0	1	0	Positive	Positive	Negative	Her2-/HR+		N/A not first tumor	N/A not first tumor	37	Alive	2nd of 2 or more primaries	No/Unknown	None/Unknown	No radiation and/or cancer-directed surgery	Detroit (Metropolitan) - 1973+
Unknown	86	2011	White	C50.0-Nipple	Moderately differentiated; Grade II	Right - origin of primary	Positive histology	I	T1b	N0(i-)	M0	Localized	51	Surgery performed	9	100	0	0	10	10	0	1	0	0	3	3	0	3	0	Positive	Positive	Negative	Her2-/HR+		Alive or dead of other cause	Alive or dead due to cancer	28	Alive	One primary only	No/Unknown	None/Unknown	No radiation and/or cancer-directed surgery	New Jersey - 2000+
Widowed	83	2008	White	C50.5-Lower-outer quadrant of breast	Well differentiated; Grade I	Right - origin of primary	Positive histology	IIB	T2	N1mi	M0	Regional	44	Surgery performed	22	100	130	0	10	10	1	987	987	20	3	3	0	13	1	Positive	Positive	Not 2010+ Breast	Not 2010+ Breast		Alive or dead of other cause	Alive or dead due to cancer	72	Alive	One primary only	No/Unknown	None/Unknown	No radiation and/or cancer-directed surgery	New Jersey - 2000+
Married (including common law)	79	2004	White	C50.4-Upper-outer quadrant of breast	Well differentiated; Grade I	Left - origin of primary	Positive histology	I	T1b	N0	M0	Localized	41	Surgery performed	10	100	0	0	10	10	0	0	0	0	3	3	0	15	0	Positive	Positive	Not 2010+ Breast	Not 2010+ Breast		Alive or dead of other cause	Dead (attributable to causes other than this cancer dx)	80	Dead	One primary only	No/Unknown	None/Unknown	No radiation and/or cancer-directed surgery	Kentucky - 2000+
Married (including common law)	87	2012	White	C50.1-Central portion of breast	Moderately differentiated; Grade II	Right - origin of primary	Positive histology	IIA	T2	N0	M0	Regional	41	Surgery performed	35	200	0	0	10	20	98	0	0	20	3	0	0	0	98	Positive	Negative	Negative	Her2-/HR+		N/A not first tumor	N/A not first tumor	24	Alive	2nd of 2 or more primaries	No/Unknown	None/Unknown	No radiation and/or cancer-directed surgery	California excluding SF/SJM/LA - 2000+
Married (including common law)	84	2009	White	C50.9-Breast, NOS	Moderately differentiated; Grade II	Right - origin of primary	Positive histology	UNK Stage	T2	N0	MX	Localized	0	Not performed, patient died prior to recommended surgery	50	100	0	99	10	10	98	0	0	0	1	0	9	0	98	Positive	Positive	Not 2010+ Breast	Not 2010+ Breast		Alive or dead of other cause	Dead (attributable to causes other than this cancer dx)	0	Dead	One primary only	No/Unknown	None/Unknown	No radiation and/or cancer-directed surgery	Connecticut - 1973+
Married (including common law)	80	2007	White	C50.9-Breast, NOS	Moderately differentiated; Grade II	Right - origin of primary	Positive histology	I	T1c	N0(i-)	M0	Localized	61	Surgery performed	17	100	0	0	10	10	0	1	1	0	3	3	0	8	0	Positive	Positive	Not 2010+ Breast	Not 2010+ Breast		Alive or dead of other cause	Alive or dead due to cancer	91	Alive	One primary only	No/Unknown	None/Unknown	No radiation and/or cancer-directed surgery	Atlanta (Metropolitan) - 1975+
Married (including common law)	84	2011	Black	C50.1-Central portion of breast	Moderately differentiated; Grade II	Right - origin of primary	Positive histology	IIIB	T4b	N2a	M0	Regional	41	Surgery performed	30	512	260	0	10	10	6	987	987	20	3	3	0	7	6	Positive	Positive	Negative	Her2-/HR+		N/A not first tumor	N/A not first tumor	41	Dead	2nd of 2 or more primaries	No/Unknown	Beam radiation	Radiation after surgery	Detroit (Metropolitan) - 1973+
Single (never married)	78	2005	White	C50.0-Nipple	Moderately differentiated; Grade II	Right - origin of primary	Positive histology	IIA	T2	N0	M0	Localized	51	Surgery performed	22	100	0	0	10	10	0	0	0	0	3	3	0	16	0	Positive	Positive	Not 2010+ Breast	Not 2010+ Breast		N/A not first tumor	N/A not first tumor	70	Dead	2nd of 2 or more primaries	No/Unknown	None/Unknown	No radiation and/or cancer-directed surgery	Atlanta (Metropolitan) - 1975+
Married (including common law)	78	2005	White	C50.1-Central portion of breast	Poorly differentiated; Grade III	Left - origin of primary	Positive histology	IIIA	T1c	N2a	M0	Regional	51	Surgery performed	15	100	250	0	10	10	8	987	987	0	3	3	0	19	8	Positive	Positive	Not 2010+ Breast	Not 2010+ Breast		N/A not first tumor	N/A not first tumor	80	Dead	2nd of 2 or more primaries	No/Unknown	Beam radiation	Radiation after surgery	Utah - 1973+
Married (including common law)	79	2006	White	C50.4-Upper-outer quadrant of breast	Moderately differentiated; Grade II	Right - origin of primary	Positive histology	IIIC	T2	N3a	M0	Regional	51	Surgery performed	40	100	250	0	10	10	13	987	987	20	3	3	0	17	13	Positive	Positive	Not 2010+ Breast	Not 2010+ Breast		N/A not first tumor	N/A not first tumor	21	Dead	2nd of 2 or more primaries	No/Unknown	Beam radiation	Radiation after surgery	Greater Georgia - 2000+
Married (including common law)	79	2006	White	C50.9-Breast, NOS	Moderately differentiated; Grade II	Left - origin of primary	Positive histology	IIIA	T2	N2a	M0	Regional	51	Surgery performed	50	100	260	0	20	20	6	987	987	0	3	3	0	11	6	Negative	Negative	Not 2010+ Breast	Not 2010+ Breast		Dead (attributable to this cancer dx)	Alive or dead due to cancer	54	Dead	1st of 2 or more primaries	Yes	None/Unknown	No radiation and/or cancer-directed surgery	New Jersey - 2000+
Married (including common law)	77	2004	White	C50.4-Upper-outer quadrant of breast	Poorly differentiated; Grade III	Right - origin of primary	Positive histology	IIIA	T2	N2a	M0	Regional	40	Surgery performed	25	100	600	0	10	10	4	987	987	0	3	3	0	23	4	Positive	Positive	Not 2010+ Breast	Not 2010+ Breast		N/A not first tumor	N/A not first tumor	87	Dead	2nd of 2 or more primaries	No/Unknown	Beam radiation	Radiation after surgery	New Jersey - 2000+
Married (including common law)	86	2013	White	C50.9-Breast, NOS	Unknown	Left - origin of primary	Positive histology	UNK Stage	TX	N0	M0	Localized	23	Surgery performed	999	100	0	0	998	998	0	0	0	0	3	3	0	5	0	Unknown	Unknown	Unknown	Unknown		Alive or dead of other cause	Alive or dead due to cancer	23	Alive	One primary only	No/Unknown	None/Unknown	No radiation and/or cancer-directed surgery	California excluding SF/SJM/LA - 2000+
Divorced	82	2009	Black	C50.0-Nipple	Moderately differentiated; Grade II	Right - origin of primary	Positive histology	I	T1b	N0(i-)	M0	Localized	41	Surgery performed	9	100	0	0	10	10	0	1	0	20	3	3	0	5	0	Positive	Positive	Not 2010+ Breast	Not 2010+ Breast		Alive or dead of other cause	Dead (attributable to causes other than this cancer dx)	11	Dead	One primary only	No/Unknown	None/Unknown	No radiation and/or cancer-directed surgery	Louisiana - 2000+
Married (including common law)	84	2011	White	C50.8-Overlapping lesion of breast	Poorly differentiated; Grade III	Right - origin of primary	Positive histology	IIA	T2	N0(i-)	M0	Localized	41	Surgery performed	29	100	0	0	10	10	0	1	1	0	3	3	0	2	0	Positive	Positive	Negative	Her2-/HR+		N/A not first tumor	N/A not first tumor	46	Alive	2nd of 2 or more primaries	No/Unknown	None/Unknown	No radiation and/or cancer-directed surgery	California excluding SF/SJM/LA - 2000+
Widowed	87	2013	White	C50.9-Breast, NOS	Moderately differentiated; Grade II	Left - origin of primary	Positive histology	I	T1c	N0	M0	Localized	0	Not recommended	18	100	0	0	10	999	98	0	0	0	1	0	0	0	98	Positive	Unknown	Unknown	Unknown		N/A not first tumor	N/A not first tumor	22	Alive	3rd of 3 or more primaries	No/Unknown	None/Unknown	No radiation and/or cancer-directed surgery	California excluding SF/SJM/LA - 2000+
Unmarried or Domestic Partner	86	2013	White	C50.1-Central portion of breast	Moderately differentiated; Grade II	Left - origin of primary	Positive histology	IIA	T2	N0(i-)	M0	Localized	41	Surgery performed	31	100	0	0	10	20	0	1	0	30	3	3	0	2	0	Positive	Negative	Positive	Her2+/HR+		Alive or dead of other cause	Alive or dead due to cancer	22	Alive	One primary only	Yes	None/Unknown	No radiation and/or cancer-directed surgery	California excluding SF/SJM/LA - 2000+
Widowed	84	2011	White	C50.9-Breast, NOS	Moderately differentiated; Grade II	Right - origin of primary	Positive histology	I	T1c	N0	M0	Localized	40	Surgery performed	12	140	0	0	10	10	0	0	0	20	3	3	0	9	0	Positive	Positive	Negative	Her2-/HR+		Alive or dead of other cause	Alive or dead due to cancer	46	Alive	One primary only	No/Unknown	None/Unknown	No radiation and/or cancer-directed surgery	Louisiana - 2000+
Married (including common law)	77	2004	White	C50.1-Central portion of breast	Moderately differentiated; Grade II	Right - origin of primary	Positive histology	IIIC	T1c	N3a	M0	Regional	51	Surgery performed	16	200	250	0	10	10	11	987	987	0	3	3	0	15	11	Positive	Positive	Not 2010+ Breast	Not 2010+ Breast		Alive or dead of other cause	Dead (attributable to causes other than this cancer dx)	39	Dead	One primary only	Yes	Beam radiation	Radiation after surgery	Los Angeles - 1992+
Married (including common law)	81	2008	White	C50.2-Upper-inner quadrant of breast	Poorly differentiated; Grade III	Left - origin of primary	Positive histology	IIIA	T2	N2a	M0	Regional	51	Surgery performed	35	100	250	0	10	10	4	987	987	0	3	3	0	12	4	Positive	Positive	Not 2010+ Breast	Not 2010+ Breast		Dead (attributable to this cancer dx)	Alive or dead due to cancer	36	Dead	One primary only	Yes	Refused	No radiation and/or cancer-directed surgery	Seattle (Puget Sound) - 1974+
Married (including common law)	85	2012	White	C50.1-Central portion of breast	Moderately differentiated; Grade II	Left - origin of primary	Positive histology	IIIB	T4b	N0(i-)	M0	Regional	41	Surgery performed	18	512	0	0	10	10	0	1	0	0	3	3	0	4	0	Positive	Positive	Negative	Her2-/HR+		Alive or dead of other cause	Alive or dead due to cancer	34	Alive	One primary only	No/Unknown	Refused	No radiation and/or cancer-directed surgery	Utah - 1973+
Separated	86	2012	Black	C50.1-Central portion of breast	Moderately differentiated; Grade II	Left - origin of primary	Positive histology	IIIB	T4b	N2a	M0	Regional	51	Surgery performed	30	512	250	0	10	10	6	987	987	0	3	3	0	11	6	Positive	Positive	Negative	Her2-/HR+		N/A not first tumor	N/A not first tumor	33	Alive	2nd of 2 or more primaries	No/Unknown	Beam radiation	Radiation after surgery	Detroit (Metropolitan) - 1973+
Married (including common law)	79	2006	White	C50.8-Overlapping lesion of breast	Poorly differentiated; Grade III	Left - origin of primary	Positive histology	IIB	T2	N1a	M0	Regional	51	Surgery performed	25	200	250	0	10	10	2	987	987	0	3	3	0	19	2	Positive	Positive	Not 2010+ Breast	Not 2010+ Breast		Alive or dead of other cause	Dead (attributable to causes other than this cancer dx)	33	Dead	One primary only	No/Unknown	None/Unknown	No radiation and/or cancer-directed surgery	Detroit (Metropolitan) - 1973+
Widowed	79	2005	White	C50.9-Breast, NOS	Poorly differentiated; Grade III	Left - origin of primary	Positive histology	IIB	T2	N1a	M0	Regional	51	Surgery performed	40	100	250	0	20	20	2	987	987	0	3	3	0	16	2	Negative	Negative	Not 2010+ Breast	Not 2010+ Breast		N/A not first tumor	N/A not first tumor	5	Dead	2nd of 2 or more primaries	No/Unknown	None/Unknown	No radiation and/or cancer-directed surgery	San Francisco-Oakland SMSA - 1973+
Married (including common law)	79	2005	White	C50.1-Central portion of breast	Poorly differentiated; Grade III	Right - origin of primary	Positive histology	I	T1c	N0	M0	Localized	51	Surgery performed	17	100	0	0	10	10	0	0	0	0	3	3	0	2	0	Positive	Positive	Not 2010+ Breast	Not 2010+ Breast		Alive or dead of other cause	Dead (attributable to causes other than this cancer dx)	22	Dead	One primary only	No/Unknown	None/Unknown	No radiation and/or cancer-directed surgery	California excluding SF/SJM/LA - 2000+
Widowed	81	2008	White	C50.9-Breast, NOS	Moderately differentiated; Grade II	Right - origin of primary	Positive histology	I	T1b	N0	M0	Localized	40	Surgery performed	8	100	0	0	10	10	98	0	0	20	3	0	0	0	98	Positive	Positive	Not 2010+ Breast	Not 2010+ Breast		N/A not first tumor	N/A not first tumor	22	Dead	3rd of 3 or more primaries	No/Unknown	None/Unknown	No radiation and/or cancer-directed surgery	New Jersey - 2000+
Widowed	84	2010	White	C50.9-Breast, NOS	Moderately differentiated; Grade II	Right - origin of primary	Positive histology	IIB	T2	N1a	M0	Regional	51	Surgery performed	32	100	250	0	10	10	1	987	987	0	3	3	0	1	1	Positive	Positive	Negative	Her2-/HR+		N/A not first tumor	N/A not first tumor	33	Dead	2nd of 2 or more primaries	No/Unknown	None/Unknown	No radiation and/or cancer-directed surgery	Kentucky - 2000+
Married (including common law)	79	2005	White	C50.1-Central portion of breast	Moderately differentiated; Grade II	Right - origin of primary	Positive histology	IIA	T2	N0	M0	Localized	41	Surgery performed	23	100	0	0	10	10	0	0	0	30	3	3	0	1	0	Positive	Positive	Not 2010+ Breast	Not 2010+ Breast		Alive or dead of other cause	Alive or dead due to cancer	116	Alive	One primary only	No/Unknown	None/Unknown	No radiation and/or cancer-directed surgery	California excluding SF/SJM/LA - 2000+
Married (including common law)	78	2004	White	C50.8-Overlapping lesion of breast	Poorly differentiated; Grade III	Left - origin of primary	Positive histology	IIA	T2	N0(i-)	M0	Localized	41	Surgery performed	28	100	0	0	10	20	0	1	0	20	3	3	0	3	0	Positive	Negative	Not 2010+ Breast	Not 2010+ Breast		Dead (attributable to this cancer dx)	Alive or dead due to cancer	100	Dead	One primary only	No/Unknown	None/Unknown	No radiation and/or cancer-directed surgery	California excluding SF/SJM/LA - 2000+
Widowed	82	2008	White	C50.4-Upper-outer quadrant of breast	Well differentiated; Grade I	Right - origin of primary	Positive histology	I	T1c	N0(i-)	M0	Localized	41	Surgery performed	18	100	0	0	10	10	0	1	0	0	3	3	0	4	0	Positive	Positive	Not 2010+ Breast	Not 2010+ Breast		N/A not first tumor	N/A not first tumor	80	Alive	3rd of 3 or more primaries	No/Unknown	None/Unknown	No radiation and/or cancer-directed surgery	California excluding SF/SJM/LA - 2000+
Single (never married)	79	2006	White	C50.1-Central portion of breast	Moderately differentiated; Grade II	Right - origin of primary	Positive histology	IIA	T2	N0	M0	Localized	41	Surgery performed	40	100	0	0	999	999	0	0	0	0	3	3	0	3	0	Unknown	Unknown	Not 2010+ Breast	Not 2010+ Breast		Alive or dead of other cause	Dead (attributable to causes other than this cancer dx)	67	Dead	One primary only	No/Unknown	None/Unknown	No radiation and/or cancer-directed surgery	Los Angeles - 1992+
Married (including common law)	78	2005	White	C50.4-Upper-outer quadrant of breast	Moderately differentiated; Grade II	Left - origin of primary	Positive histology	IIB	T2	N1a	M0	Regional	51	Surgery performed	40	100	250	0	10	10	1	987	987	0	3	3	0	22	1	Positive	Positive	Not 2010+ Breast	Not 2010+ Breast		Dead (attributable to this cancer dx)	Alive or dead due to cancer	44	Dead	1st of 2 or more primaries	No/Unknown	None/Unknown	No radiation and/or cancer-directed surgery	New Mexico - 1973+
Unknown	79	2006	White	C50.1-Central portion of breast	Moderately differentiated; Grade II	Right - origin of primary	Positive histology	IIA	T2	N0	M0	Localized	22	Surgery performed	28	100	0	0	999	999	0	0	0	30	3	3	0	4	0	Unknown	Unknown	Not 2010+ Breast	Not 2010+ Breast		Alive or dead of other cause	Alive or dead due to cancer	104	Alive	One primary only	No/Unknown	None/Unknown	No radiation and/or cancer-directed surgery	New Mexico - 1973+
Married (including common law)	78	2005	White	C50.9-Breast, NOS	Poorly differentiated; Grade III	Right - origin of primary	Positive histology	IIIB	T4b	N2a	M0	Regional	41	Surgery performed	33	510	250	0	10	20	9	987	987	0	3	3	0	15	9	Positive	Negative	Not 2010+ Breast	Not 2010+ Breast		N/A not first tumor	N/A not first tumor	55	Dead	2nd of 2 or more primaries	No/Unknown	None/Unknown	No radiation and/or cancer-directed surgery	Atlanta (Metropolitan) - 1975+
Married (including common law)	81	2007	White	C50.8-Overlapping lesion of breast	Moderately differentiated; Grade II	Left - origin of primary	Positive histology	IIA	T2	N0	M0	Localized	51	Surgery performed	32	100	0	0	10	10	0	0	0	30	Blank(s)	Blank(s)	Blank(s)	19	0	Positive	Positive	Not 2010+ Breast	Not 2010+ Breast		Alive or dead of other cause	Dead (attributable to causes other than this cancer dx)	60	Dead	One primary only	No/Unknown	None/Unknown	No radiation and/or cancer-directed surgery	Seattle (Puget Sound) - 1974+
Married (including common law)	78	2004	White	C50.1-Central portion of breast	Moderately differentiated; Grade II	Right - origin of primary	Positive histology	IIA	T2	N0	M0	Localized	51	Surgery performed	40	100	0	0	10	10	0	0	0	0	3	3	0	25	0	Positive	Positive	Not 2010+ Breast	Not 2010+ Breast		N/A not first tumor	N/A not first tumor	77	Dead	2nd of 2 or more primaries	No/Unknown	None/Unknown	No radiation and/or cancer-directed surgery	Utah - 1973+
Divorced	81	2008	White	C50.1-Central portion of breast	Moderately differentiated; Grade II	Left - origin of primary	Positive histology	IIIA	T1c	N2a	M0	Regional	51	Surgery performed	14	100	250	0	20	10	5	987	987	40	3	3	0	5	5	Negative	Positive	Not 2010+ Breast	Not 2010+ Breast		N/A not first tumor	N/A not first tumor	54	Dead	2nd of 2 or more primaries	Yes	Beam radiation	Radiation after surgery	California excluding SF/SJM/LA - 2000+
Married (including common law)	86	2012	Black	C50.8-Overlapping lesion of breast	Poorly differentiated; Grade III	Left - origin of primary	Positive histology	IIIA	T2	N2NOS	M0	Regional	0	Not recommended, contraindicated due to other cond; autopsy only (1973-2002)	27	100	630	0	10	10	98	987	987	987	1	0	0	0	98	Positive	Positive	Negative	Her2-/HR+		N/A not first tumor	N/A not first tumor	3	Dead	3rd of 3 or more primaries	No/Unknown	None/Unknown	No radiation and/or cancer-directed surgery	New Jersey - 2000+
Married (including common law)	81	2008	White	C50.1-Central portion of breast	Moderately differentiated; Grade II	Left - origin of primary	Positive histology	IIA	T2	N0(i-)	M0	Localized	40	Surgery performed	22	100	0	0	10	10	0	1	0	20	3	3	0	4	0	Positive	Positive	Not 2010+ Breast	Not 2010+ Breast		N/A not first tumor	N/A not first tumor	30	Dead	2nd of 2 or more primaries	No/Unknown	None/Unknown	No radiation and/or cancer-directed surgery	California excluding SF/SJM/LA - 2000+
Widowed	86	2013	White	C50.0-Nipple	Moderately differentiated; Grade II	Right - origin of primary	Positive histology	IIA	T2	N0(i+)	M0	Regional	41	Surgery performed	25	200	50	0	10	10	0	987	987	20	3	3	0	5	0	Positive	Positive	Negative	Her2-/HR+		Alive or dead of other cause	Alive or dead due to cancer	19	Alive	One primary only	No/Unknown	None/Unknown	No radiation and/or cancer-directed surgery	California excluding SF/SJM/LA - 2000+
Married (including common law)	81	2008	Black	C50.4-Upper-outer quadrant of breast	Moderately differentiated; Grade II	Right - origin of primary	Positive histology	I	T1c	N0	M0	Localized	52	Surgery performed	12	100	0	0	10	10	98	0	0	20	3	0	0	0	98	Positive	Positive	Not 2010+ Breast	Not 2010+ Breast		Alive or dead of other cause	Alive or dead due to cancer	79	Alive	1st of 2 or more primaries	No/Unknown	None/Unknown	No radiation and/or cancer-directed surgery	Greater Georgia - 2000+
Married (including common law)	80	2006	White	C50.1-Central portion of breast	Moderately differentiated; Grade II	Left - origin of primary	Positive histology	I	T1c	N0	M0	Localized	41	Surgery performed	20	100	0	0	10	10	0	0	0	40	3	3	0	10	0	Positive	Positive	Not 2010+ Breast	Not 2010+ Breast		N/A not first tumor	N/A not first tumor	58	Dead	2nd of 2 or more primaries	No/Unknown	None/Unknown	No radiation and/or cancer-directed surgery	Greater Georgia - 2000+
Married (including common law)	85	2012	White	C50.9-Breast, NOS	Moderately differentiated; Grade II	Right - origin of primary	Positive histology	IIB	T2	N1a	M0	Regional	51	Surgery performed	27	200	250	0	10	10	2	987	987	0	3	3	0	29	2	Positive	Positive	Unknown	Unknown		Alive or dead of other cause	Alive or dead due to cancer	3	Alive	One primary only	No/Unknown	Beam radiation	Radiation after surgery	Connecticut - 1973+
Single (never married)	81	2008	Black	C50.8-Overlapping lesion of breast	Well differentiated; Grade I	Left - origin of primary	Positive histology	IIA	T2	N0	M0	Localized	41	Surgery performed	40	100	0	0	10	10	98	0	0	50	3	1	0	0	98	Positive	Positive	Not 2010+ Breast	Not 2010+ Breast		Alive or dead of other cause	Dead (attributable to causes other than this cancer dx)	1	Dead	One primary only	No/Unknown	None/Unknown	No radiation and/or cancer-directed surgery	California excluding SF/SJM/LA - 2000+
Widowed	81	2008	White	C50.8-Overlapping lesion of breast	Poorly differentiated; Grade III	Right - origin of primary	Positive histology	IIA	T2	N0	M0	Localized	51	Surgery performed	25	100	0	0	997	997	0	0	0	0	3	3	0	1	0	Unknown	Unknown	Not 2010+ Breast	Not 2010+ Breast		N/A not first tumor	N/A not first tumor	78	Alive	4th of 4 or more primaries	No/Unknown	None/Unknown	No radiation and/or cancer-directed surgery	California excluding SF/SJM/LA - 2000+
Married (including common law)	79	2006	White	C50.8-Overlapping lesion of breast	Poorly differentiated; Grade III	Right - origin of primary	Positive histology	I	T1c	N0	M0	Localized	41	Surgery performed	15	100	0	0	10	10	0	0	0	20	3	3	0	2	0	Positive	Positive	Not 2010+ Breast	Not 2010+ Breast		Alive or dead of other cause	Dead (attributable to causes other than this cancer dx)	24	Dead	One primary only	No/Unknown	None/Unknown	No radiation and/or cancer-directed surgery	New Jersey - 2000+
Widowed	80	2006	Other (American Indian/AK Native, Asian/Pacific Islander)	C50.9-Breast, NOS	Moderately differentiated; Grade II	Left - origin of primary	Positive histology	I	T1b	N0	M0	Localized	51	Surgery performed	9	100	0	0	10	10	0	0	0	0	3	3	0	13	0	Positive	Positive	Not 2010+ Breast	Not 2010+ Breast		N/A not first tumor	N/A not first tumor	101	Alive	2nd of 2 or more primaries	No/Unknown	None/Unknown	No radiation and/or cancer-directed surgery	Louisiana - 2000+
Married (including common law)	82	2009	White	C50.1-Central portion of breast	Poorly differentiated; Grade III	Left - origin of primary	Positive histology	IIIA	T2	N2a	M0	Regional	51	Surgery performed	32	200	250	0	10	10	4	987	987	0	3	3	0	9	4	Positive	Positive	Not 2010+ Breast	Not 2010+ Breast		Dead (attributable to this cancer dx)	Alive or dead due to cancer	19	Dead	One primary only	No/Unknown	Beam radiation	Radiation after surgery	San Jose-Monterey - 1992+
Married (including common law)	81	2008	White	C50.9-Breast, NOS	Poorly differentiated; Grade III	Right - origin of primary	Positive histology	IIIC	T2	N3a	M0	Regional	51	Surgery performed	22	200	250	0	10	10	10	987	987	30	3	3	0	21	10	Positive	Positive	Not 2010+ Breast	Not 2010+ Breast		Dead (attributable to this cancer dx)	Alive or dead due to cancer	43	Dead	One primary only	Yes	Beam radiation	Radiation after surgery	Seattle (Puget Sound) - 1974+
Married (including common law)	78	2005	White	C50.4-Upper-outer quadrant of breast	Moderately differentiated; Grade II	Right - origin of primary	Positive histology	IIA	T2	N0	M0	Localized	41	Surgery performed	25	100	0	0	10	10	0	0	0	0	Blank(s)	Blank(s)	Blank(s)	21	0	Positive	Positive	Not 2010+ Breast	Not 2010+ Breast		N/A not first tumor	N/A not first tumor	112	Alive	2nd of 2 or more primaries	No/Unknown	None/Unknown	No radiation and/or cancer-directed surgery	Iowa - 1973+
Married (including common law)	78	2004	White	C50.0-Nipple	Moderately differentiated; Grade II	Left - origin of primary	Positive histology	I	T1b	N0	M0	Localized	24	Surgery performed	10	100	0	0	10	10	98	0	0	20	3	0	0	0	98	Positive	Positive	Not 2010+ Breast	Not 2010+ Breast		N/A not first tumor	N/A not first tumor	102	Dead	2nd of 2 or more primaries	No/Unknown	None/Unknown	No radiation and/or cancer-directed surgery	New Mexico - 1973+
Unknown	87	2013	White	C50.2-Upper-inner quadrant of breast	Poorly differentiated; Grade III	Right - origin of primary	Positive histology	IIA	T2	N0(i-)	M0	Localized	40	Surgery performed	30	100	0	0	10	10	0	1	0	0	3	3	0	7	0	Positive	Positive	Negative	Her2-/HR+		N/A not first tumor	N/A not first tumor	16	Alive	2nd of 2 or more primaries	No/Unknown	None/Unknown	No radiation and/or cancer-directed surgery	New Jersey - 2000+
Married (including common law)	82	2008	White	C50.8-Overlapping lesion of breast	Moderately differentiated; Grade II	Left - origin of primary	Positive histology	I	T1c	N0	M0	Localized	50	Surgery performed	20	100	0	0	10	10	0	0	0	20	3	3	0	15	0	Positive	Positive	Not 2010+ Breast	Not 2010+ Breast		Alive or dead of other cause	Alive or dead due to cancer	76	Alive	One primary only	No/Unknown	None/Unknown	No radiation and/or cancer-directed surgery	California excluding SF/SJM/LA - 2000+
Married (including common law)	78	2004	White	C50.1-Central portion of breast	Moderately differentiated; Grade II	Left - origin of primary	Positive histology	IIIA	T1c	N2a	M0	Regional	51	Surgery performed	17	100	250	0	10	10	8	987	987	0	3	3	0	18	8	Positive	Positive	Not 2010+ Breast	Not 2010+ Breast		Alive or dead of other cause	Dead (attributable to causes other than this cancer dx)	62	Dead	1st of 2 or more primaries	No/Unknown	Beam radiation	Radiation after surgery	California excluding SF/SJM/LA - 2000+
Married (including common law)	87	2013	White	C50.9-Breast, NOS	Well differentiated; Grade I	Left - origin of primary	Positive histology	I	T1c	N0	M0	Localized	0	Not recommended	12	100	0	0	10	10	98	0	0	0	0	0	0	0	98	Positive	Positive	Negative	Her2-/HR+		Alive or dead of other cause	Alive or dead due to cancer	16	Alive	One primary only	No/Unknown	None/Unknown	No radiation and/or cancer-directed surgery	Los Angeles - 1992+
Married (including common law)	83	2009	White	C50.2-Upper-inner quadrant of breast	Moderately differentiated; Grade II	Right - origin of primary	Positive histology	I	T1c	N0(i-)	M0	Localized	41	Surgery performed	18	100	0	0	10	10	0	1	0	0	3	3	0	2	0	Positive	Positive	Not 2010+ Breast	Not 2010+ Breast		Alive or dead of other cause	Dead (attributable to causes other than this cancer dx)	42	Dead	1st of 2 or more primaries	No/Unknown	None/Unknown	No radiation and/or cancer-directed surgery	California excluding SF/SJM/LA - 2000+
Married (including common law)	80	2007	White	C50.9-Breast, NOS	Moderately differentiated; Grade II	Left - origin of primary	Positive histology	IIIB	T4b	N1a	M0	Regional	51	Surgery performed	56	510	250	0	10	10	1	987	987	0	3	3	0	20	1	Positive	Positive	Not 2010+ Breast	Not 2010+ Breast		Dead (attributable to this cancer dx)	Alive or dead due to cancer	27	Dead	One primary only	No/Unknown	None/Unknown	No radiation and/or cancer-directed surgery	California excluding SF/SJM/LA - 2000+
Married (including common law)	87	2013	White	C50.8-Overlapping lesion of breast	Moderately differentiated; Grade II	Left - origin of primary	Positive histology	IIA	T2	N0	M0	Localized	41	Surgery performed	26	100	0	0	10	20	0	0	0	0	3	3	0	2	0	Positive	Negative	Negative	Her2-/HR+		N/A not first tumor	N/A not first tumor	15	Alive	2nd of 2 or more primaries	No/Unknown	None/Unknown	No radiation and/or cancer-directed surgery	New Jersey - 2000+
Widowed	79	2006	White	C50.2-Upper-inner quadrant of breast	Moderately differentiated; Grade II	Right - origin of primary	Positive histology	IIA	T2	N0	M0	Localized	22	Surgery performed	28	100	0	0	10	10	0	0	0	0	3	3	0	1	0	Positive	Positive	Not 2010+ Breast	Not 2010+ Breast		N/A not first tumor	N/A not first tumor	99	Alive	2nd of 2 or more primaries	No/Unknown	Beam radiation	Radiation after surgery	Los Angeles - 1992+
Widowed	87	2013	White	C50.5-Lower-outer quadrant of breast	Moderately differentiated; Grade II	Right - origin of primary	Positive histology	IIA	T1c	N1NOS	M0	Regional	23	Surgery performed	20	100	250	0	10	10	0	987	987	0	3	3	0	9	1	Positive	Positive	Negative	Her2-/HR+		Alive or dead of other cause	Alive or dead due to cancer	15	Alive	One primary only	No/Unknown	Beam radiation	Radiation after surgery	Atlanta (Metropolitan) - 1975+
Married (including common law)	81	2008	Other (American Indian/AK Native, Asian/Pacific Islander)	C50.9-Breast, NOS	Moderately differentiated; Grade II	Left - origin of primary	Positive histology	I	T1c	N0(i-)	M0	Localized	41	Surgery performed	17	100	0	0	10	10	0	1	1	0	3	3	0	2	0	Positive	Positive	Not 2010+ Breast	Not 2010+ Breast		Alive or dead of other cause	Alive or dead due to cancer	75	Alive	One primary only	No/Unknown	Refused	No radiation and/or cancer-directed surgery	Hawaii - 1973+
Widowed	77	2004	White	C50.9-Breast, NOS	Poorly differentiated; Grade III	Right - origin of primary	Positive histology	I	T1c	N0	M0	Localized	41	Surgery performed	15	100	0	0	10	10	0	0	0	20	1	3	0	4	0	Positive	Positive	Not 2010+ Breast	Not 2010+ Breast		Alive or dead of other cause	Dead (attributable to causes other than this cancer dx)	57	Dead	One primary only	No/Unknown	Refused	No radiation and/or cancer-directed surgery	San Francisco-Oakland SMSA - 1973+
Single (never married)	83	2010	White	C50.9-Breast, NOS	Poorly differentiated; Grade III	Right - origin of primary	Positive histology	IIA	T2	N0	M0	Localized	0	Not recommended, contraindicated due to other cond; autopsy only (1973-2002)	39	100	0	0	10	10	98	0	0	0	1	0	0	0	98	Positive	Positive	Positive	Her2+/HR+		Alive or dead of other cause	Dead (attributable to causes other than this cancer dx)	2	Dead	One primary only	No/Unknown	None/Unknown	No radiation and/or cancer-directed surgery	New Jersey - 2000+
Married (including common law)	85	2011	White	C50.0-Nipple	Moderately differentiated; Grade II	Left - origin of primary	Positive histology	I	T1c	N0(i-)	M0	Localized	41	Surgery performed	15	100	0	0	998	998	0	1	0	0	3	3	0	3	0	Unknown	Unknown	Unknown	Unknown		Alive or dead of other cause	Alive or dead due to cancer	36	Alive	One primary only	No/Unknown	None/Unknown	No radiation and/or cancer-directed surgery	New Jersey - 2000+
Married (including common law)	85	2011	White	C50.8-Overlapping lesion of breast	Well differentiated; Grade I	Left - origin of primary	Positive histology	I	T1c	N0	M0	Localized	51	Surgery performed	12	100	0	0	10	10	0	0	0	20	3	3	0	12	0	Positive	Positive	Negative	Her2-/HR+		N/A not first tumor	N/A not first tumor	38	Alive	2nd of 2 or more primaries	No/Unknown	None/Unknown	No radiation and/or cancer-directed surgery	New Jersey - 2000+
Married (including common law)	85	2011	Black	C50.1-Central portion of breast	Poorly differentiated; Grade III	Right - origin of primary	Positive histology	IIA	T2	N0(i-)	M0	Regional	41	Surgery performed	30	200	0	0	10	10	0	1	0	0	3	3	0	6	0	Positive	Positive	Negative	Her2-/HR+		N/A not first tumor	N/A not first tumor	38	Alive	3rd of 3 or more primaries	No/Unknown	None/Unknown	No radiation and/or cancer-directed surgery	Los Angeles - 1992+
Single (never married)	83	2010	White	C50.1-Central portion of breast	Moderately differentiated; Grade II	Right - origin of primary	Positive histology	IIA	T2	N0	M0	Regional	51	Surgery performed	35	200	0	0	10	10	0	0	0	0	3	3	0	9	0	Positive	Positive	Negative	Her2-/HR+		Dead (attributable to this cancer dx)	Alive or dead due to cancer	32	Dead	1st of 2 or more primaries	No/Unknown	None/Unknown	No radiation and/or cancer-directed surgery	California excluding SF/SJM/LA - 2000+
Single (never married)	82	2008	White	C50.1-Central portion of breast	Unknown	Right - origin of primary	Positive histology	I	T1c	N0	M0	Regional	50	Surgery performed	20	200	0	0	10	10	0	0	0	20	3	3	0	9	0	Positive	Positive	Not 2010+ Breast	Not 2010+ Breast		Alive or dead of other cause	Dead (attributable to causes other than this cancer dx)	51	Dead	One primary only	No/Unknown	None/Unknown	No radiation and/or cancer-directed surgery	San Francisco-Oakland SMSA - 1973+
Single (never married)	80	2006	Other (American Indian/AK Native, Asian/Pacific Islander)	C50.1-Central portion of breast	Well differentiated; Grade I	Left - origin of primary	Positive histology	IIA	T2	N0	M0	Localized	51	Surgery performed	23	100	0	0	10	10	0	0	0	0	3	3	0	2	0	Positive	Positive	Not 2010+ Breast	Not 2010+ Breast		Dead (attributable to this cancer dx)	Alive or dead due to cancer	39	Dead	One primary only	No/Unknown	None/Unknown	No radiation and/or cancer-directed surgery	California excluding SF/SJM/LA - 2000+
Single (never married)	78	2004	White	C50.1-Central portion of breast	Poorly differentiated; Grade III	Right - origin of primary	Positive histology	IIA	T1c	N1	M0	Regional	51	Surgery performed	13	200	600	0	10	10	5	987	987	50	9	9	9	5	5	Positive	Positive	Not 2010+ Breast	Not 2010+ Breast		Alive or dead of other cause	Alive or dead due to cancer	76	Alive	1st of 2 or more primaries	No/Unknown	None/Unknown	No radiation and/or cancer-directed surgery	Los Angeles - 1992+
Widowed	83	2009	White	C50.1-Central portion of breast	Moderately differentiated; Grade II	Right - origin of primary	Positive histology	IIA	T2	N0	M0	Regional	50	Surgery performed	40	200	0	0	10	10	0	0	0	0	3	3	0	10	0	Positive	Positive	Not 2010+ Breast	Not 2010+ Breast		Dead (attributable to this cancer dx)	Alive or dead due to cancer	43	Dead	One primary only	No/Unknown	None/Unknown	No radiation and/or cancer-directed surgery	New Jersey - 2000+
Unknown	86	2012	White	C50.1-Central portion of breast	Poorly differentiated; Grade III	Left - origin of primary	Positive histology	IIIC	T1c	N3a	M0	Regional	51	Surgery performed	18	200	250	0	10	10	10	987	987	20	3	3	0	15	10	Positive	Positive	Negative	Her2-/HR+		Alive or dead of other cause	Alive or dead due to cancer	24	Alive	One primary only	No/Unknown	Beam radiation	Radiation after surgery	New Jersey - 2000+
Married (including common law)	80	2006	White	C50.0-Nipple	Moderately differentiated; Grade II	Right - origin of primary	Positive histology	I	T1c	N0(i-)	M0	Regional	41	Surgery performed	14	200	0	0	10	10	0	1	0	0	Blank(s)	Blank(s)	Blank(s)	2	0	Positive	Positive	Not 2010+ Breast	Not 2010+ Breast		Alive or dead of other cause	Alive or dead due to cancer	96	Alive	One primary only	No/Unknown	Beam radiation	Radiation after surgery	Seattle (Puget Sound) - 1974+
Unknown	85	2013	Other (American Indian/AK Native, Asian/Pacific Islander)	C50.9-Breast, NOS	Unknown	Left - origin of primary	Positive histology	UNK Stage	TX	NX	MX	Unknown/unstaged	99	Unknown; death certificate; or autopsy only (2003+)	999	999	999	99	999	999	99	987	987	987	9	9	9	99	99	Unknown	Unknown	Unknown	Unknown		N/A not first tumor	N/A not first tumor	23	Alive	2nd of 2 or more primaries	No/Unknown	None/Unknown	No radiation and/or cancer-directed surgery	Hawaii - 1973+
Married (including common law)	81	2009	White	C50.1-Central portion of breast	Poorly differentiated; Grade III	Left - origin of primary	Positive histology	UNK Stage	T2	N3NOS	MX	Regional	51	Surgery performed	35	200	820	99	10	10	17	987	987	0	3	3	0	24	17	Positive	Positive	Not 2010+ Breast	Not 2010+ Breast		Alive or dead of other cause	Dead (attributable to causes other than this cancer dx)	17	Dead	One primary only	Yes	Beam radiation	Radiation after surgery	Iowa - 1973+
Married (including common law)	80	2008	White	C50.1-Central portion of breast	Moderately differentiated; Grade II	Right - origin of primary	Positive histology	IIA	T2	N0	M0	Localized	41	Surgery performed	40	100	0	0	10	10	0	0	0	30	3	3	0	2	0	Positive	Positive	Not 2010+ Breast	Not 2010+ Breast		N/A not first tumor	N/A not first tumor	83	Alive	2nd of 2 or more primaries	No/Unknown	None/Unknown	No radiation and/or cancer-directed surgery	Seattle (Puget Sound) - 1974+
Married (including common law)	81	2009	White	C50.1-Central portion of breast	Moderately differentiated; Grade II	Left - origin of primary	Positive histology	IIA	T2	N0(i-)	M0	Localized	41	Surgery performed	38	100	0	0	10	10	0	1	0	0	3	3	0	3	0	Positive	Positive	Not 2010+ Breast	Not 2010+ Breast		Alive or dead of other cause	Alive or dead due to cancer	70	Alive	One primary only	No/Unknown	None/Unknown	No radiation and/or cancer-directed surgery	Detroit (Metropolitan) - 1973+
Married (including common law)	83	2011	White	C50.4-Upper-outer quadrant of breast	Moderately differentiated; Grade II	Right - origin of primary	Positive histology	IIIA	T2	N2a	M0	Regional	51	Surgery performed	21	100	250	0	10	10	4	987	987	20	3	3	0	17	4	Positive	Positive	Negative	Her2-/HR+		Dead (attributable to this cancer dx)	Alive or dead due to cancer	38	Dead	One primary only	Yes	None/Unknown	No radiation and/or cancer-directed surgery	Kentucky - 2000+
Widowed	79	2007	White	C50.1-Central portion of breast	Unknown	Left - origin of primary	Positive histology	IIIA	T3	N1	M0	Regional	0	Not recommended	65	100	260	0	10	20	95	987	987	0	1	1	0	95	95	Positive	Negative	Not 2010+ Breast	Not 2010+ Breast		Dead (attributable to this cancer dx)	Alive or dead due to cancer	18	Dead	One primary only	Yes	None/Unknown	No radiation and/or cancer-directed surgery	New Jersey - 2000+
Married (including common law)	77	2005	White	C50.1-Central portion of breast	Poorly differentiated; Grade III	Left - origin of primary	Positive histology	IIA	T2	N0	M0	Localized	41	Surgery performed	26	100	0	0	10	10	0	0	0	20	3	3	0	2	0	Positive	Positive	Not 2010+ Breast	Not 2010+ Breast		N/A not first tumor	N/A not first tumor	6	Dead	2nd of 2 or more primaries	No/Unknown	None/Unknown	No radiation and/or cancer-directed surgery	California excluding SF/SJM/LA - 2000+
Married (including common law)	79	2007	White	C50.1-Central portion of breast	Moderately differentiated; Grade II	Right - origin of primary	Positive histology	I	T1c	N0	M0	Regional	41	Surgery performed	20	200	0	0	10	10	0	0	0	0	3	3	0	8	0	Positive	Positive	Not 2010+ Breast	Not 2010+ Breast		N/A not first tumor	N/A not first tumor	60	Dead	2nd of 2 or more primaries	No/Unknown	Refused	No radiation and/or cancer-directed surgery	California excluding SF/SJM/LA - 2000+
Married (including common law)	77	2005	White	C50.9-Breast, NOS	Moderately differentiated; Grade II	Left - origin of primary	Positive histology	IV	T1c	N0	M1	Distant	22	Surgery performed	20	100	0	44	998	998	98	0	0	0	3	0	3	98	0	Unknown	Unknown	Not 2010+ Breast	Not 2010+ Breast		N/A not first tumor	N/A not first tumor	4	Dead	3rd of 3 or more primaries	Yes	None/Unknown	No radiation and/or cancer-directed surgery	New Jersey - 2000+
Married (including common law)	79	2006	Black	C50.9-Breast, NOS	Moderately differentiated; Grade II	Left - origin of primary	Positive histology	IIIA	T2	N2a	M0	Regional	51	Surgery performed	30	100	250	0	10	10	4	987	987	0	3	3	0	9	4	Positive	Positive	Not 2010+ Breast	Not 2010+ Breast		N/A not first tumor	N/A not first tumor	53	Dead	2nd of 2 or more primaries	Yes	None/Unknown	No radiation and/or cancer-directed surgery	Atlanta (Metropolitan) - 1975+
Widowed	81	2009	White	C50.9-Breast, NOS	Unknown	Right - origin of primary	Positive histology	IIA	T2	N0	M0	Localized	0	Recommended but not performed, unknown reason	43	100	0	0	10	20	98	0	0	0	0	0	0	0	98	Positive	Negative	Not 2010+ Breast	Not 2010+ Breast		N/A not first tumor	N/A not first tumor	29	Dead	4th of 4 or more primaries	No/Unknown	None/Unknown	No radiation and/or cancer-directed surgery	New Mexico - 1973+
Married (including common law)	85	2013	White	C50.9-Breast, NOS	Unknown	Right - origin of primary	Positive histology	IIB	T3	N0	M0	Localized	51	Surgery performed	52	100	0	0	10	10	98	0	0	0	3	1	0	0	98	Positive	Positive	Negative	Her2-/HR+		Dead (attributable to this cancer dx)	Alive or dead due to cancer	13	Dead	One primary only	No/Unknown	None/Unknown	No radiation and/or cancer-directed surgery	New Jersey - 2000+
Married (including common law)	76	2004	Other (American Indian/AK Native, Asian/Pacific Islander)	C50.9-Breast, NOS	Poorly differentiated; Grade III	Right - origin of primary	Positive histology	UNK Stage	TX	N1a	M0	Regional	20	Surgery performed	999	100	600	0	10	999	1	987	987	0	3	3	0	1	1	Positive	Unknown	Not 2010+ Breast	Not 2010+ Breast		Alive or dead of other cause	Alive or dead due to cancer	129	Alive	1st of 2 or more primaries	No/Unknown	Beam radiation	Radiation after surgery	California excluding SF/SJM/LA - 2000+
Widowed	81	2009	White	C50.1-Central portion of breast	Moderately differentiated; Grade II	Left - origin of primary	Positive histology	IIIA	T2	N2a	M0	Regional	41	Surgery performed	25	100	250	0	10	10	4	987	987	0	3	3	0	9	4	Positive	Positive	Not 2010+ Breast	Not 2010+ Breast		N/A not first tumor	N/A not first tumor	69	Alive	2nd of 2 or more primaries	Yes	None/Unknown	No radiation and/or cancer-directed surgery	California excluding SF/SJM/LA - 2000+
Married (including common law)	76	2004	White	C50.9-Breast, NOS	Moderately differentiated; Grade II	Right - origin of primary	Positive histology	IIIB	T4b	N0(i+)	M0	Regional	51	Surgery performed	20	510	50	0	10	10	0	987	987	20	3	3	0	2	0	Positive	Positive	Not 2010+ Breast	Not 2010+ Breast		Alive or dead of other cause	Dead (attributable to causes other than this cancer dx)	70	Dead	1st of 2 or more primaries	Yes	Beam radiation	Radiation after surgery	San Jose-Monterey - 1992+
Married (including common law)	80	2008	Other (American Indian/AK Native, Asian/Pacific Islander)	C50.1-Central portion of breast	Moderately differentiated; Grade II	Left - origin of primary	Positive histology	I	T1c	N0	M0	Localized	41	Surgery performed	15	100	0	0	10	10	98	0	0	20	3	0	0	0	98	Positive	Positive	Not 2010+ Breast	Not 2010+ Breast		N/A not first tumor	N/A not first tumor	7	Dead	2nd of 2 or more primaries	No/Unknown	None/Unknown	No radiation and/or cancer-directed surgery	Hawaii - 1973+
Married (including common law)	79	2007	White	C50.9-Breast, NOS	Poorly differentiated; Grade III	Left - origin of primary	Positive histology	IIB	T2	N1a	M0	Regional	51	Surgery performed	27	200	250	0	10	10	3	987	987	0	Blank(s)	Blank(s)	Blank(s)	29	3	Positive	Positive	Not 2010+ Breast	Not 2010+ Breast		Alive or dead of other cause	Alive or dead due to cancer	93	Alive	One primary only	No/Unknown	Beam radiation	Radiation after surgery	Seattle (Puget Sound) - 1974+
Married (including common law)	83	2011	White	C50.1-Central portion of breast	Poorly differentiated; Grade III	Right - origin of primary	Positive histology	IIA	T2	N0	M0	Regional	51	Surgery performed	35	200	0	0	10	10	98	0	0	0	3	0	0	0	98	Positive	Positive	Negative	Her2-/HR+		Alive or dead of other cause	Alive or dead due to cancer	44	Alive	One primary only	No/Unknown	None/Unknown	No radiation and/or cancer-directed surgery	Iowa - 1973+
Widowed	80	2007	White	C50.1-Central portion of breast	Poorly differentiated; Grade III	Right - origin of primary	Positive histology	IIA	T2	N0(i+)	M0	Localized	51	Surgery performed	27	100	0	0	10	10	0	2	0	0	3	3	0	2	0	Positive	Positive	Not 2010+ Breast	Not 2010+ Breast		Alive or dead of other cause	Dead (attributable to causes other than this cancer dx)	68	Dead	One primary only	No/Unknown	None/Unknown	No radiation and/or cancer-directed surgery	Greater Georgia - 2000+
Married (including common law)	81	2008	White	C50.1-Central portion of breast	Moderately differentiated; Grade II	Left - origin of primary	Positive histology	IIA	T2	N0(i+)	M0	Localized	41	Surgery performed	23	100	0	0	10	10	0	9	0	20	3	3	0	2	0	Positive	Positive	Not 2010+ Breast	Not 2010+ Breast		N/A not first tumor	N/A not first tumor	80	Alive	2nd of 2 or more primaries	No/Unknown	None/Unknown	No radiation and/or cancer-directed surgery	Greater Georgia - 2000+
Widowed	82	2010	White	C50.1-Central portion of breast	Moderately differentiated; Grade II	Right - origin of primary	Positive histology	IIA	T2	N0	M0	Localized	51	Surgery performed	21	100	0	0	10	10	0	0	0	20	3	3	0	7	0	Positive	Positive	Negative	Her2-/HR+		N/A not first tumor	N/A not first tumor	56	Alive	2nd of 2 or more primaries	No/Unknown	None/Unknown	No radiation and/or cancer-directed surgery	Kentucky - 2000+
Married (including common law)	78	2006	White	C50.1-Central portion of breast	Poorly differentiated; Grade III	Right - origin of primary	Positive histology	IIB	T2	N1a	M0	Regional	22	Surgery performed	32	100	250	0	10	10	1	987	987	0	3	3	0	2	1	Positive	Positive	Not 2010+ Breast	Not 2010+ Breast		N/A not first tumor	N/A not first tumor	59	Dead	2nd of 2 or more primaries	No/Unknown	None/Unknown	No radiation and/or cancer-directed surgery	New Jersey - 2000+
Married (including common law)	77	2005	White	C50.4-Upper-outer quadrant of breast	Well differentiated; Grade I	Left - origin of primary	Positive histology	I	T1b	N0	M0	Localized	40	Surgery performed	10	100	0	0	10	10	0	0	0	0	3	3	0	3	0	Positive	Positive	Not 2010+ Breast	Not 2010+ Breast		Alive or dead of other cause	Dead (attributable to causes other than this cancer dx)	77	Dead	One primary only	No/Unknown	None/Unknown	No radiation and/or cancer-directed surgery	New Jersey - 2000+
Married (including common law)	79	2006	Other (American Indian/AK Native, Asian/Pacific Islander)	C50.1-Central portion of breast	Poorly differentiated; Grade III	Right - origin of primary	Positive histology	IIB	T2	N1a	M0	Regional	41	Surgery performed	21	100	250	0	998	998	1	987	987	0	3	3	0	3	1	Unknown	Unknown	Not 2010+ Breast	Not 2010+ Breast		Dead (attributable to this cancer dx)	Alive or dead due to cancer	20	Dead	One primary only	No/Unknown	None/Unknown	No radiation and/or cancer-directed surgery	California excluding SF/SJM/LA - 2000+
Single (never married)	77	2005	White	C50.1-Central portion of breast	Poorly differentiated; Grade III	Right - origin of primary	Positive histology	UNK Stage	TX	N1	MX	Regional	0	Not recommended	54	999	600	99	10	10	97	987	987	50	9	1	9	1	1	Positive	Positive	Not 2010+ Breast	Not 2010+ Breast		Alive or dead of other cause	Dead (attributable to causes other than this cancer dx)	0	Dead	One primary only	No/Unknown	None/Unknown	No radiation and/or cancer-directed surgery	Los Angeles - 1992+
Single (never married)	79	2007	Black	C50.0-Nipple	Moderately differentiated; Grade II	Left - origin of primary	Positive histology	I	T1c	N0	M0	Regional	51	Surgery performed	19	200	0	0	10	10	0	0	0	0	3	3	0	8	0	Positive	Positive	Not 2010+ Breast	Not 2010+ Breast		Alive or dead of other cause	Alive or dead due to cancer	80	Alive	One primary only	Yes	None/Unknown	No radiation and/or cancer-directed surgery	New Jersey - 2000+
Widowed	81	2008	White	C50.4-Upper-outer quadrant of breast	Moderately differentiated; Grade II	Right - origin of primary	Positive histology	IIA	T2	N0(i-)	M0	Localized	40	Surgery performed	40	100	0	0	10	10	0	1	0	20	3	3	0	4	0	Positive	Positive	Not 2010+ Breast	Not 2010+ Breast		N/A not first tumor	N/A not first tumor	58	Alive	2nd of 2 or more primaries	No/Unknown	None/Unknown	No radiation and/or cancer-directed surgery	Louisiana - 2000+
Married (including common law)	76	2004	White	C50.1-Central portion of breast	Poorly differentiated; Grade III	Right - origin of primary	Positive histology	IIA	T1b	N1a	M0	Regional	51	Surgery performed	8	100	250	0	10	10	1	987	987	0	3	3	0	15	1	Positive	Positive	Not 2010+ Breast	Not 2010+ Breast		N/A not first tumor	N/A not first tumor	127	Alive	2nd of 2 or more primaries	No/Unknown	None/Unknown	No radiation and/or cancer-directed surgery	Louisiana - 2000+
Single (never married)	84	2011	White	C50.3-Lower-inner quadrant of breast	Moderately differentiated; Grade II	Left - origin of primary	Positive histology	I	T1c	N0	M0	Regional	41	Surgery performed	16	200	0	0	10	10	0	0	0	0	3	3	0	1	0	Positive	Positive	Negative	Her2-/HR+		Alive or dead of other cause	Alive or dead due to cancer	43	Alive	One primary only	No/Unknown	None/Unknown	No radiation and/or cancer-directed surgery	San Francisco-Oakland SMSA - 1973+
Married (including common law)	81	2009	White	C50.4-Upper-outer quadrant of breast	Well differentiated; Grade I	Left - origin of primary	Positive histology	I	T1c	N0	M0	Localized	41	Surgery performed	13	100	0	0	10	10	0	0	0	0	3	3	0	1	0	Positive	Positive	Not 2010+ Breast	Not 2010+ Breast		Alive or dead of other cause	Alive or dead due to cancer	67	Alive	One primary only	No/Unknown	None/Unknown	No radiation and/or cancer-directed surgery	Greater Georgia - 2000+
Married (including common law)	82	2009	White	C50.8-Overlapping lesion of breast	Poorly differentiated; Grade III	Right - origin of primary	Positive histology	IIA	T2	N0(i-)	M0	Regional	41	Surgery performed	27	200	0	0	10	10	0	1	0	0	3	3	0	5	0	Positive	Positive	Not 2010+ Breast	Not 2010+ Breast		Alive or dead of other cause	Dead (attributable to causes other than this cancer dx)	33	Dead	1st of 2 or more primaries	No/Unknown	None/Unknown	No radiation and/or cancer-directed surgery	California excluding SF/SJM/LA - 2000+
Married (including common law)	77	2004	White	C50.9-Breast, NOS	Moderately differentiated; Grade II	Right - origin of primary	Positive histology	UNK Stage	T1c	N0	MX	Regional	51	Surgery performed	12	200	0	99	10	10	0	0	0	0	6	6	9	11	0	Positive	Positive	Not 2010+ Breast	Not 2010+ Breast		N/A not first tumor	N/A not first tumor	16	Dead	2nd of 2 or more primaries	Yes	None/Unknown	No radiation and/or cancer-directed surgery	New Jersey - 2000+
Married (including common law)	79	2006	White	C50.1-Central portion of breast	Moderately differentiated; Grade II	Left - origin of primary	Positive histology	IIA	T2	N0	M0	Regional	51	Surgery performed	29	200	0	0	10	10	0	0	0	0	Blank(s)	Blank(s)	Blank(s)	12	0	Positive	Positive	Not 2010+ Breast	Not 2010+ Breast		Alive or dead of other cause	Dead (attributable to causes other than this cancer dx)	39	Dead	One primary only	No/Unknown	None/Unknown	No radiation and/or cancer-directed surgery	Iowa - 1973+
Single (never married)	78	2006	Black	C50.9-Breast, NOS	Moderately differentiated; Grade II	Left - origin of primary	Positive microscopic confirm, method not specified	UNK Stage	TX	N0	M0	Localized	0	Recommended but not performed, patient refused	999	100	0	0	10	20	98	0	0	0	1	0	0	0	98	Positive	Negative	Not 2010+ Breast	Not 2010+ Breast		N/A not first tumor	N/A not first tumor	70	Dead	3rd of 3 or more primaries	No/Unknown	None/Unknown	No radiation and/or cancer-directed surgery	Detroit (Metropolitan) - 1973+
Married (including common law)	84	2012	White	C50.1-Central portion of breast	Moderately differentiated; Grade II	Left - origin of primary	Positive histology	IIIA	T2	N2a	M0	Regional	51	Surgery performed	32	100	250	0	10	10	5	987	987	20	3	3	0	32	5	Positive	Positive	Negative	Her2-/HR+		Alive or dead of other cause	Alive or dead due to cancer	29	Alive	One primary only	No/Unknown	Beam radiation	Radiation after surgery	San Francisco-Oakland SMSA - 1973+
Single (never married)	79	2007	White	C50.1-Central portion of breast	Poorly differentiated; Grade III	Right - origin of primary	Positive histology	IIIC	T2	N3c	M0	Distant	51	Surgery performed	30	300	800	0	999	999	16	987	987	0	5	3	0	18	16	Unknown	Unknown	Not 2010+ Breast	Not 2010+ Breast		Alive or dead of other cause	Dead (attributable to causes other than this cancer dx)	16	Dead	One primary only	Yes	None/Unknown	No radiation and/or cancer-directed surgery	New Mexico - 1973+
Married (including common law)	78	2006	White	C50.0-Nipple	Moderately differentiated; Grade II	Right - origin of primary	Positive histology	IIA	T1c	N1a	M0	Regional	51	Surgery performed	18	200	600	0	10	10	1	987	987	20	3	3	0	11	1	Positive	Positive	Not 2010+ Breast	Not 2010+ Breast		N/A not first tumor	N/A not first tumor	71	Dead	4th of 4 or more primaries	No/Unknown	None/Unknown	No radiation and/or cancer-directed surgery	Greater Georgia - 2000+
Married (including common law)	80	2007	White	C50.8-Overlapping lesion of breast	Well differentiated; Grade I	Left - origin of primary	Positive histology	IIA	T1c	N1a	M0	Regional	41	Surgery performed	15	100	260	0	10	10	2	987	987	20	3	3	0	7	2	Positive	Positive	Not 2010+ Breast	Not 2010+ Breast		Alive or dead of other cause	Dead (attributable to causes other than this cancer dx)	59	Dead	One primary only	Yes	Beam radiation	Radiation after surgery	California excluding SF/SJM/LA - 2000+
Married (including common law)	86	2013	White	C50.4-Upper-outer quadrant of breast	Moderately differentiated; Grade II	Left - origin of primary	Positive histology	IIA	T1c	N1NOS	M0	Regional	41	Surgery performed	15	100	250	0	10	20	0	987	987	20	3	3	0	24	2	Positive	Negative	Negative	Her2-/HR+		N/A not first tumor	N/A not first tumor	17	Alive	2nd of 2 or more primaries	No/Unknown	Refused	No radiation and/or cancer-directed surgery	California excluding SF/SJM/LA - 2000+
Single (never married)	79	2007	Black	C50.1-Central portion of breast	Unknown	Left - origin of primary	Positive histology	UNK Stage	T1c	NX	MX	Localized	22	Surgery performed	20	100	999	99	10	20	98	987	987	50	3	0	0	0	98	Positive	Negative	Not 2010+ Breast	Not 2010+ Breast		N/A not first tumor	N/A not first tumor	19	Dead	2nd of 2 or more primaries	No/Unknown	None/Unknown	No radiation and/or cancer-directed surgery	Los Angeles - 1992+
Divorced	79	2007	Black	C50.9-Breast, NOS	Moderately differentiated; Grade II	Right - origin of primary	Positive histology	IIA	T1c	N1a	M0	Regional	51	Surgery performed	20	100	600	0	10	30	2	987	987	20	3	3	0	15	2	Positive	Borderline	Not 2010+ Breast	Not 2010+ Breast		Alive or dead of other cause	Dead (attributable to causes other than this cancer dx)	19	Dead	1st of 2 or more primaries	No/Unknown	None/Unknown	No radiation and/or cancer-directed surgery	Los Angeles - 1992+
Widowed	85	2012	White	C50.1-Central portion of breast	Poorly differentiated; Grade III	Left - origin of primary	Positive histology	IIB	T2	N1a	M0	Regional	41	Surgery performed	25	100	250	0	10	10	2	987	987	20	3	3	0	11	2	Positive	Positive	Negative	Her2-/HR+		N/A not first tumor	N/A not first tumor	23	Alive	2nd of 2 or more primaries	Yes	None/Unknown	No radiation and/or cancer-directed surgery	Los Angeles - 1992+
Married (including common law)	78	2005	White	C50.1-Central portion of breast	Undifferentiated; anaplastic; Grade IV	Left - origin of primary	Positive histology	I	T1b	N0	M0	Localized	51	Surgery performed	7	100	0	0	998	998	0	0	0	20	3	0	0	6	0	Unknown	Unknown	Not 2010+ Breast	Not 2010+ Breast		Alive or dead of other cause	Alive or dead due to cancer	112	Alive	One primary only	No/Unknown	None/Unknown	No radiation and/or cancer-directed surgery	California excluding SF/SJM/LA - 2000+
Married (including common law)	81	2008	White	C50.2-Upper-inner quadrant of breast	Moderately differentiated; Grade II	Right - origin of primary	Positive histology	IIA	T2	N0(i-)	M0	Localized	41	Surgery performed	30	100	0	0	10	10	0	1	0	0	3	3	0	1	0	Positive	Positive	Not 2010+ Breast	Not 2010+ Breast		N/A not first tumor	N/A not first tumor	76	Alive	2nd of 2 or more primaries	No/Unknown	None/Unknown	No radiation and/or cancer-directed surgery	Los Angeles - 1992+
Widowed	84	2011	White	C50.1-Central portion of breast	Moderately differentiated; Grade II	Right - origin of primary	Positive histology	IIA	T2	N0(i-)	M0	Localized	51	Surgery performed	25	100	0	0	10	10	0	1	1	0	3	3	0	9	0	Positive	Positive	Negative	Her2-/HR+		N/A not first tumor	N/A not first tumor	40	Alive	2nd of 2 or more primaries	No/Unknown	None/Unknown	No radiation and/or cancer-directed surgery	Detroit (Metropolitan) - 1973+
Married (including common law)	85	2012	White	C50.1-Central portion of breast	Poorly differentiated; Grade III	Left - origin of primary	Positive histology	IIIB	T4b	N1mi	M0	Regional	51	Surgery performed	44	512	130	0	10	10	0	987	987	0	3	3	1	7	2	Positive	Positive	Negative	Her2-/HR+		N/A not first tumor	N/A not first tumor	28	Alive	3rd of 3 or more primaries	No/Unknown	Beam radiation	Radiation after surgery	New Jersey - 2000+
Married (including common law)	83	2011	White	C50.4-Upper-outer quadrant of breast	Moderately differentiated; Grade II	Right - origin of primary	Positive histology	IIA	T1c	N1mi	M0	Regional	41	Surgery performed	13	200	150	0	10	10	1	987	987	20	3	3	0	4	1	Positive	Positive	Positive	Her2+/HR+		N/A not first tumor	N/A not first tumor	32	Alive	3rd of 3 or more primaries	No/Unknown	Recommended, unknown if administered	No radiation and/or cancer-directed surgery	Greater Georgia - 2000+
Married (including common law)	83	2010	White	C50.1-Central portion of breast	Poorly differentiated; Grade III	Left - origin of primary	Positive histology	IIIA	T2	N2a	M0	Regional	50	Surgery performed	35	100	600	0	10	10	4	987	987	0	3	3	0	6	4	Positive	Positive	Positive	Her2+/HR+		Alive or dead of other cause	Dead (attributable to causes other than this cancer dx)	20	Dead	One primary only	No/Unknown	None/Unknown	No radiation and/or cancer-directed surgery	New Jersey - 2000+
Married (including common law)	79	2006	White	C50.5-Lower-outer quadrant of breast	Moderately differentiated; Grade II	Right - origin of primary	Positive histology	IIA	T2	N0(i-)	M0	Localized	41	Surgery performed	23	100	0	0	10	10	0	1	0	0	3	3	0	1	0	Positive	Positive	Not 2010+ Breast	Not 2010+ Breast		Alive or dead of other cause	Alive or dead due to cancer	99	Alive	One primary only	No/Unknown	None/Unknown	No radiation and/or cancer-directed surgery	California excluding SF/SJM/LA - 2000+
Married (including common law)	78	2005	White	C50.1-Central portion of breast	Moderately differentiated; Grade II	Left - origin of primary	Positive histology	IIB	T2	N1a	M0	Regional	51	Surgery performed	22	100	250	0	10	10	1	987	987	0	3	3	0	12	1	Positive	Positive	Not 2010+ Breast	Not 2010+ Breast		Alive or dead of other cause	Dead (attributable to causes other than this cancer dx)	90	Dead	One primary only	No/Unknown	None/Unknown	No radiation and/or cancer-directed surgery	California excluding SF/SJM/LA - 2000+
Single (never married)	77	2004	White	C50.1-Central portion of breast	Moderately differentiated; Grade II	Right - origin of primary	Positive histology	IIA	T2	N0	M0	Localized	51	Surgery performed	30	100	0	0	10	10	0	0	0	30	3	3	0	1	0	Positive	Positive	Not 2010+ Breast	Not 2010+ Breast		Alive or dead of other cause	Dead (attributable to causes other than this cancer dx)	98	Dead	One primary only	No/Unknown	None/Unknown	No radiation and/or cancer-directed surgery	California excluding SF/SJM/LA - 2000+
Married (including common law)	81	2008	White	C50.1-Central portion of breast	Poorly differentiated; Grade III	Left - origin of primary	Positive histology	IIB	T2	N1a	M0	Regional	51	Surgery performed	30	200	250	0	10	10	1	987	987	0	3	3	0	24	1	Positive	Positive	Not 2010+ Breast	Not 2010+ Breast		N/A not first tumor	N/A not first tumor	23	Dead	2nd of 2 or more primaries	No/Unknown	None/Unknown	No radiation and/or cancer-directed surgery	New Jersey - 2000+
Married (including common law)	86	2013	White	C50.8-Overlapping lesion of breast	Poorly differentiated; Grade III	Right - origin of primary	Positive histology	IIA	T2	N0(i-)	M0	Localized	51	Surgery performed	35	100	0	0	10	10	0	1	0	20	3	3	0	3	0	Positive	Positive	Negative	Her2-/HR+		Alive or dead of other cause	Alive or dead due to cancer	5	Alive	One primary only	No/Unknown	None/Unknown	No radiation and/or cancer-directed surgery	Los Angeles - 1992+
Unknown	77	2004	Black	C50.9-Breast, NOS	Poorly differentiated; Grade III	Right - origin of primary	Positive histology	IV	T4a	N2a	M1	Distant	51	Surgery performed	40	400	250	44	10	10	9	987	987	0	3	3	1	10	9	Positive	Positive	Not 2010+ Breast	Not 2010+ Breast		Dead (attributable to this cancer dx)	Alive or dead due to cancer	4	Dead	One primary only	No/Unknown	Recommended, unknown if administered	No radiation and/or cancer-directed surgery	Atlanta (Metropolitan) - 1975+
Divorced	83	2010	White	C50.2-Upper-inner quadrant of breast	Well differentiated; Grade I	Right - origin of primary	Positive histology	I	T1c	N0	M0	Localized	22	Surgery performed	14	100	0	0	10	10	98	0	0	987	5	0	0	0	98	Positive	Positive	Negative	Her2-/HR+		Alive or dead of other cause	Alive or dead due to cancer	51	Alive	1st of 2 or more primaries	No/Unknown	Beam radiation	Radiation after surgery	Detroit (Metropolitan) - 1973+
Married (including common law)	85	2012	White	C50.1-Central portion of breast	Poorly differentiated; Grade III	Right - origin of primary	Positive histology	IIB	T2	N1mi	M0	Regional	40	Surgery performed	22	200	130	0	10	10	1	987	987	0	3	3	0	1	1	Positive	Positive	Negative	Her2-/HR+		Alive or dead of other cause	Alive or dead due to cancer	26	Alive	1st of 2 or more primaries	No/Unknown	None/Unknown	No radiation and/or cancer-directed surgery	New Mexico - 1973+
Married (including common law)	77	2004	White	C50.4-Upper-outer quadrant of breast	Poorly differentiated; Grade III	Right - origin of primary	Positive histology	I	T1c	N0	M0	Localized	51	Surgery performed	18	100	0	0	10	10	0	0	0	20	3	3	0	4	0	Positive	Positive	Not 2010+ Breast	Not 2010+ Breast		Alive or dead of other cause	Dead (attributable to causes other than this cancer dx)	22	Dead	1st of 2 or more primaries	No/Unknown	None/Unknown	No radiation and/or cancer-directed surgery	Greater Georgia - 2000+
Unknown	86	2013	White	C50.1-Central portion of breast	Poorly differentiated; Grade III	Left - origin of primary	Positive histology	IIA	T2	N0	M0	Localized	51	Surgery performed	994	100	0	0	20	20	0	0	0	0	3	3	0	14	0	Negative	Negative	Negative	Triple Negative		Alive or dead of other cause	Alive or dead due to cancer	12	Alive	One primary only	No/Unknown	None/Unknown	No radiation and/or cancer-directed surgery	New Jersey - 2000+
Married (including common law)	76	2004	White	C50.4-Upper-outer quadrant of breast	Moderately differentiated; Grade II	Left - origin of primary	Positive histology	IIA	T1c	N1a	M0	Regional	51	Surgery performed	12	100	250	0	10	10	1	987	987	0	3	3	0	13	1	Positive	Positive	Not 2010+ Breast	Not 2010+ Breast		N/A not first tumor	N/A not first tumor	68	Dead	2nd of 2 or more primaries	No/Unknown	None/Unknown	No radiation and/or cancer-directed surgery	New Jersey - 2000+
Married (including common law)	82	2010	Other (American Indian/AK Native, Asian/Pacific Islander)	C50.1-Central portion of breast	Moderately differentiated; Grade II	Left - origin of primary	Positive histology	IIA	T2	N0	M0	Regional	41	Surgery performed	22	200	0	0	10	10	98	0	0	0	3	0	0	0	98	Positive	Positive	Unknown	Unknown		N/A not first tumor	N/A not first tumor	37	Dead	2nd of 2 or more primaries	No/Unknown	None/Unknown	No radiation and/or cancer-directed surgery	California excluding SF/SJM/LA - 2000+
Single (never married)	85	2012	White	C50.1-Central portion of breast	Poorly differentiated; Grade III	Right - origin of primary	Positive histology	IIIB	T4b	N1	M0	Regional	22	Surgery performed	15	512	255	0	10	10	98	987	987	0	3	0	0	0	98	Positive	Positive	Negative	Her2-/HR+		N/A not first tumor	N/A not first tumor	21	Dead	2nd of 2 or more primaries	No/Unknown	Beam radiation	Radiation after surgery	California excluding SF/SJM/LA - 2000+
Married (including common law)	80	2007	White	C50.9-Breast, NOS	Poorly differentiated; Grade III	Right - origin of primary	Positive histology	I	T1a	N0	M0	Localized	40	Surgery performed	5	100	0	0	10	10	98	0	0	20	3	0	0	0	98	Positive	Positive	Not 2010+ Breast	Not 2010+ Breast		Alive or dead of other cause	Dead (attributable to causes other than this cancer dx)	79	Dead	1st of 2 or more primaries	No/Unknown	Beam radiation	Radiation after surgery	New Jersey - 2000+
Married (including common law)	83	2010	White	C50.8-Overlapping lesion of breast	Poorly differentiated; Grade III	Right - origin of primary	Positive histology	I	T1c	N0(i-)	M0	Localized	41	Surgery performed	11	100	0	0	10	20	0	1	0	50	3	3	0	4	0	Positive	Negative	Negative	Her2-/HR+		N/A not first tumor	N/A not first tumor	50	Alive	6th of 6 or more primaries	No/Unknown	None/Unknown	No radiation and/or cancer-directed surgery	Los Angeles - 1992+
Married (including common law)	80	2007	White	C50.9-Breast, NOS	Poorly differentiated; Grade III	Left - origin of primary	Positive histology	IIIA	T2	N2a	M0	Regional	40	Surgery performed	40	100	250	0	10	10	8	987	987	20	3	3	0	13	8	Positive	Positive	Not 2010+ Breast	Not 2010+ Breast		N/A not first tumor	N/A not first tumor	79	Dead	2nd of 2 or more primaries	No/Unknown	Beam radiation	Radiation after surgery	New Jersey - 2000+
Married (including common law)	78	2005	White	C50.1-Central portion of breast	Poorly differentiated; Grade III	Left - origin of primary	Positive histology	IIA	T1c	N1a	M0	Regional	51	Surgery performed	15	100	250	0	10	20	1	987	987	0	3	3	0	23	1	Positive	Negative	Not 2010+ Breast	Not 2010+ Breast		Alive or dead of other cause	Dead (attributable to causes other than this cancer dx)	29	Dead	1st of 2 or more primaries	No/Unknown	None/Unknown	No radiation and/or cancer-directed surgery	New Jersey - 2000+
Widowed	83	2010	White	C50.2-Upper-inner quadrant of breast	Poorly differentiated; Grade III	Left - origin of primary	Positive histology	I	T1c	N0	M0	Localized	0	Not recommended	12	100	0	0	10	10	98	0	0	30	1	0	0	0	98	Positive	Positive	Negative	Her2-/HR+		N/A not first tumor	N/A not first tumor	2	Dead	3rd of 3 or more primaries	No/Unknown	None/Unknown	No radiation and/or cancer-directed surgery	New Jersey - 2000+
Married (including common law)	85	2012	White	C50.1-Central portion of breast	Well differentiated; Grade I	Left - origin of primary	Positive histology	IIA	T1c	N1a	M0	Regional	40	Surgery performed	17	200	250	0	998	998	2	987	987	0	3	3	0	5	2	Unknown	Unknown	Unknown	Unknown		N/A not first tumor	N/A not first tumor	25	Alive	2nd of 2 or more primaries	No/Unknown	None/Unknown	No radiation and/or cancer-directed surgery	New Mexico - 1973+
Single (never married)	80	2007	White	C50.1-Central portion of breast	Poorly differentiated; Grade III	Left - origin of primary	Positive histology	IIB	T2	N1a	M0	Regional	51	Surgery performed	26	200	260	0	10	10	1	987	987	0	3	3	0	31	1	Positive	Positive	Not 2010+ Breast	Not 2010+ Breast		Alive or dead of other cause	Dead (attributable to causes other than this cancer dx)	44	Dead	One primary only	No/Unknown	None/Unknown	No radiation and/or cancer-directed surgery	Atlanta (Metropolitan) - 1975+
Married (including common law)	80	2007	White	C50.8-Overlapping lesion of breast	Moderately differentiated; Grade II	Left - origin of primary	Positive histology	IIA	T2	N0	M0	Localized	51	Surgery performed	25	100	0	0	10	10	0	0	0	20	3	3	0	15	0	Positive	Positive	Not 2010+ Breast	Not 2010+ Breast		Alive or dead of other cause	Alive or dead due to cancer	84	Alive	1st of 2 or more primaries	No/Unknown	None/Unknown	No radiation and/or cancer-directed surgery	Iowa - 1973+
Married (including common law)	84	2011	White	C50.8-Overlapping lesion of breast	Poorly differentiated; Grade III	Right - origin of primary	Positive histology	IIIB	T4b	N1	M0	Regional	40	Surgery performed	38	512	255	0	10	10	98	987	987	0	3	0	0	0	98	Positive	Positive	Negative	Her2-/HR+		N/A not first tumor	N/A not first tumor	36	Alive	2nd of 2 or more primaries	No/Unknown	None/Unknown	No radiation and/or cancer-directed surgery	New Jersey - 2000+
Married (including common law)	84	2011	White	C50.1-Central portion of breast	Poorly differentiated; Grade III	Left - origin of primary	Positive histology	IIIB	T4b	N1a	M0	Regional	51	Surgery performed	32	512	250	0	10	10	1	987	987	20	3	3	0	13	1	Positive	Positive	Negative	Her2-/HR+		N/A not first tumor	N/A not first tumor	36	Alive	2nd of 2 or more primaries	No/Unknown	Beam radiation	Radiation after surgery	Louisiana - 2000+
Married (including common law)	82	2011	White	C50.1-Central portion of breast	Moderately differentiated; Grade II	Left - origin of primary	Positive histology	IV	T1c	N0	M1	Distant	24	Surgery performed	15	100	0	60	10	10	98	0	0	20	3	0	0	0	98	Positive	Positive	Negative	Her2-/HR+		N/A not first tumor	N/A not first tumor	33	Dead	2nd of 2 or more primaries	No/Unknown	None/Unknown	No radiation and/or cancer-directed surgery	New Jersey - 2000+
Married (including common law)	76	2005	White	C50.0-Nipple	Poorly differentiated; Grade III	Left - origin of primary	Positive histology	IIB	T2	N1a	M0	Regional	51	Surgery performed	22	200	600	0	10	10	3	987	987	30	3	3	0	18	3	Positive	Positive	Not 2010+ Breast	Not 2010+ Breast		Dead (attributable to this cancer dx)	Alive or dead due to cancer	68	Dead	One primary only	No/Unknown	None/Unknown	No radiation and/or cancer-directed surgery	Kentucky - 2000+
Married (including common law)	81	2010	White	C50.1-Central portion of breast	Poorly differentiated; Grade III	Right - origin of primary	Positive histology	IIA	T2	N0	M0	Regional	51	Surgery performed	40	200	0	0	10	10	0	0	0	0	3	3	0	19	0	Positive	Positive	Positive	Her2+/HR+		Alive or dead of other cause	Alive or dead due to cancer	59	Alive	One primary only	No/Unknown	None/Unknown	No radiation and/or cancer-directed surgery	Los Angeles - 1992+
Widowed	83	2012	White	C50.4-Upper-outer quadrant of breast	Moderately differentiated; Grade II	Right - origin of primary	Positive histology	IIA	T1b	N1mi	M0	Regional	22	Surgery performed	8	100	150	0	10	10	1	987	987	20	3	3	0	1	1	Positive	Positive	Negative	Her2-/HR+		Alive or dead of other cause	Alive or dead due to cancer	33	Alive	One primary only	No/Unknown	Beam radiation	Radiation after surgery	Utah - 1973+
Married (including common law)	75	2004	White	C50.0-Nipple	Moderately differentiated; Grade II	Right - origin of primary	Positive histology	IIA	T2	N0	M0	Localized	51	Surgery performed	27	100	0	0	998	998	98	0	0	0	3	3	0	8	0	Unknown	Unknown	Not 2010+ Breast	Not 2010+ Breast		Alive or dead of other cause	Dead (attributable to causes other than this cancer dx)	50	Dead	One primary only	No/Unknown	None/Unknown	No radiation and/or cancer-directed surgery	New Mexico - 1973+
Married (including common law)	75	2004	White	C50.8-Overlapping lesion of breast	Moderately differentiated; Grade II	Left - origin of primary	Positive histology	IIA	T2	N0	M0	Localized	51	Surgery performed	28	100	0	0	10	10	0	0	0	0	3	3	0	16	0	Positive	Positive	Not 2010+ Breast	Not 2010+ Breast		Alive or dead of other cause	Alive or dead due to cancer	131	Alive	One primary only	No/Unknown	None/Unknown	No radiation and/or cancer-directed surgery	Detroit (Metropolitan) - 1973+
Divorced	84	2013	White	C50.8-Overlapping lesion of breast	Moderately differentiated; Grade II	Right - origin of primary	Positive histology	I	T1c	N0	M0	Localized	41	Surgery performed	20	100	0	0	10	10	0	0	0	0	3	3	0	2	0	Positive	Positive	Negative	Her2-/HR+		N/A not first tumor	N/A not first tumor	23	Alive	2nd of 2 or more primaries	No/Unknown	None/Unknown	No radiation and/or cancer-directed surgery	Seattle (Puget Sound) - 1974+
Married (including common law)	81	2010	White	C50.1-Central portion of breast	Moderately differentiated; Grade II	Right - origin of primary	Positive histology	IIIA	T2	N2NOS	M0	Regional	20	Surgery performed	28	200	620	0	10	10	6	987	987	20	3	3	0	23	6	Positive	Positive	Negative	Her2-/HR+		Alive or dead of other cause	Dead (attributable to causes other than this cancer dx)	33	Dead	One primary only	No/Unknown	None/Unknown	No radiation and/or cancer-directed surgery	New Jersey - 2000+
Married (including common law)	80	2009	White	C50.9-Breast, NOS	Moderately differentiated; Grade II	Left - origin of primary	Positive histology	IIA	T1c	N1a	M0	Regional	41	Surgery performed	18	100	250	0	10	10	2	987	987	0	3	3	0	14	2	Positive	Positive	Not 2010+ Breast	Not 2010+ Breast		N/A not first tumor	N/A not first tumor	70	Alive	2nd of 2 or more primaries	No/Unknown	None/Unknown	No radiation and/or cancer-directed surgery	Louisiana - 2000+
Married (including common law)	83	2012	White	C50.4-Upper-outer quadrant of breast	Moderately differentiated; Grade II	Left - origin of primary	Positive histology	I	T1b	N0	M0	Localized	40	Surgery performed	8	100	0	0	10	10	0	0	0	20	3	3	0	11	0	Positive	Positive	Positive	Her2+/HR+		Alive or dead of other cause	Alive or dead due to cancer	34	Alive	One primary only	No/Unknown	None/Unknown	No radiation and/or cancer-directed surgery	California excluding SF/SJM/LA - 2000+
Married (including common law)	79	2008	White	C50.1-Central portion of breast	Moderately differentiated; Grade II	Right - origin of primary	Positive histology	I	T1c	N0(i-)	M0	Localized	40	Surgery performed	20	100	0	0	997	997	0	1	0	20	3	3	0	11	0	Unknown	Unknown	Not 2010+ Breast	Not 2010+ Breast		N/A not first tumor	N/A not first tumor	76	Dead	4th of 4 or more primaries	No/Unknown	None/Unknown	No radiation and/or cancer-directed surgery	Hawaii - 1973+
Married (including common law)	82	2011	White	C50.1-Central portion of breast	Moderately differentiated; Grade II	Right - origin of primary	Positive histology	IIA	T2	N0	M0	Localized	0	Not recommended	35	100	0	0	10	10	98	0	0	0	0	0	0	0	98	Positive	Positive	Negative	Her2-/HR+		Alive or dead of other cause	Alive or dead due to cancer	46	Alive	One primary only	No/Unknown	None/Unknown	No radiation and/or cancer-directed surgery	Utah - 1973+
Married (including common law)	78	2007	White	C50.4-Upper-outer quadrant of breast	Moderately differentiated; Grade II	Right - origin of primary	Positive histology	IIB	T2	N1	M0	Regional	51	Surgery performed	25	100	600	0	10	20	7	987	987	20	5	5	0	15	7	Positive	Negative	Not 2010+ Breast	Not 2010+ Breast		Dead (attributable to this cancer dx)	Alive or dead due to cancer	39	Dead	One primary only	Yes	Beam radiation	Radiation after surgery	Atlanta (Metropolitan) - 1975+
Widowed	77	2006	White	C50.9-Breast, NOS	Poorly differentiated; Grade III	Right - origin of primary	Positive histology	IIIA	T3	N1a	M0	Regional	22	Surgery performed	55	200	250	0	997	997	1	987	987	0	3	3	0	1	1	Unknown	Unknown	Not 2010+ Breast	Not 2010+ Breast		Dead (attributable to this cancer dx)	Alive or dead due to cancer	7	Dead	One primary only	No/Unknown	None/Unknown	No radiation and/or cancer-directed surgery	Detroit (Metropolitan) - 1973+
Married (including common law)	79	2008	White	C50.1-Central portion of breast	Moderately differentiated; Grade II	Right - origin of primary	Positive histology	IIA	T2	N0(i-)	M0	Regional	41	Surgery performed	25	200	0	0	10	10	0	1	0	20	3	3	0	11	0	Positive	Positive	Not 2010+ Breast	Not 2010+ Breast		Alive or dead of other cause	Dead (attributable to causes other than this cancer dx)	53	Dead	One primary only	No/Unknown	None/Unknown	No radiation and/or cancer-directed surgery	Detroit (Metropolitan) - 1973+
Unknown	77	2006	White	C50.9-Breast, NOS	Moderately differentiated; Grade II	Left - origin of primary	Positive histology	IIA	T2	N0	M0	Localized	0	Recommended but not performed, patient refused	50	100	0	0	10	10	98	0	0	987	0	0	0	0	98	Positive	Positive	Not 2010+ Breast	Not 2010+ Breast		Alive or dead of other cause	Dead (attributable to causes other than this cancer dx)	6	Dead	One primary only	Yes	None/Unknown	No radiation and/or cancer-directed surgery	Connecticut - 1973+
Married (including common law)	81	2010	White	C50.8-Overlapping lesion of breast	Moderately differentiated; Grade II	Right - origin of primary	Positive histology	I	T1c	N0	M0	Localized	22	Surgery performed	19	100	0	0	10	10	98	0	0	0	3	0	0	0	98	Positive	Positive	Negative	Her2-/HR+		Alive or dead of other cause	Dead (attributable to causes other than this cancer dx)	2	Dead	One primary only	No/Unknown	None/Unknown	No radiation and/or cancer-directed surgery	Connecticut - 1973+
Married (including common law)	77	2006	White	C50.1-Central portion of breast	Moderately differentiated; Grade II	Left - origin of primary	Positive histology	I	T1c	N0	M0	Localized	51	Surgery performed	15	100	0	0	10	10	0	0	0	0	Blank(s)	Blank(s)	Blank(s)	15	0	Positive	Positive	Not 2010+ Breast	Not 2010+ Breast		Alive or dead of other cause	Alive or dead due to cancer	105	Alive	1st of 2 or more primaries	No/Unknown	None/Unknown	No radiation and/or cancer-directed surgery	Iowa - 1973+
Widowed	77	2005	White	C50.4-Upper-outer quadrant of breast	Moderately differentiated; Grade II	Left - origin of primary	Positive histology	IIA	T2	N0	M0	Localized	51	Surgery performed	23	100	0	0	10	10	0	0	0	0	3	3	0	6	0	Positive	Positive	Not 2010+ Breast	Not 2010+ Breast		N/A not first tumor	N/A not first tumor	112	Alive	2nd of 2 or more primaries	No/Unknown	None/Unknown	No radiation and/or cancer-directed surgery	San Francisco-Oakland SMSA - 1973+
Widowed	84	2013	White	C50.1-Central portion of breast	Poorly differentiated; Grade III	Left - origin of primary	Positive histology	IIA	T2	N0	M0	Regional	51	Surgery performed	22	200	0	0	10	10	0	0	0	0	3	3	0	10	0	Positive	Positive	Negative	Her2-/HR+		Alive or dead of other cause	Dead (attributable to causes other than this cancer dx)	7	Dead	One primary only	No/Unknown	None/Unknown	No radiation and/or cancer-directed surgery	Iowa - 1973+
Married (including common law)	81	2010	White	C50.9-Breast, NOS	Well differentiated; Grade I	Left - origin of primary	Positive histology	IIIB	T4a	N2a	M0	Regional	51	Surgery performed	31	400	250	0	10	10	7	987	987	20	3	3	0	9	7	Positive	Positive	Negative	Her2-/HR+		Alive or dead of other cause	Alive or dead due to cancer	58	Alive	One primary only	No/Unknown	Beam radiation	Radiation after surgery	Atlanta (Metropolitan) - 1975+
Single (never married)	77	2006	Black	C50.9-Breast, NOS	Poorly differentiated; Grade III	Right - origin of primary	Positive histology	IV	T4b	N1	M1	Distant	41	Surgery performed	60	510	600	44	10	20	98	987	987	0	3	0	0	0	98	Positive	Negative	Not 2010+ Breast	Not 2010+ Breast		Dead (attributable to this cancer dx)	Alive or dead due to cancer	13	Dead	1st of 2 or more primaries	No/Unknown	None/Unknown	No radiation and/or cancer-directed surgery	Greater Georgia - 2000+
Married (including common law)	82	2011	White	C50.2-Upper-inner quadrant of breast	Poorly differentiated; Grade III	Left - origin of primary	Positive histology	IIIA	T2	N2a	M0	Regional	51	Surgery performed	35	100	250	0	10	10	5	987	987	20	3	3	0	29	5	Positive	Positive	Negative	Her2-/HR+		N/A not first tumor	N/A not first tumor	14	Dead	2nd of 2 or more primaries	No/Unknown	None/Unknown	No radiation and/or cancer-directed surgery	California excluding SF/SJM/LA - 2000+
Single (never married)	85	2013	White	C50.1-Central portion of breast	Well differentiated; Grade I	Left - origin of primary	Positive histology	IIA	T1c	N1a	M0	Regional	51	Surgery performed	20	200	250	0	10	10	2	987	987	0	3	3	0	2	2	Positive	Positive	Negative	Her2-/HR+		Alive or dead of other cause	Alive or dead due to cancer	6	Alive	One primary only	No/Unknown	Beam radiation	Radiation after surgery	Los Angeles - 1992+
Married (including common law)	75	2004	White	C50.1-Central portion of breast	Moderately differentiated; Grade II	Right - origin of primary	Positive histology	I	T1c	N0	M0	Localized	22	Surgery performed	15	100	0	0	10	10	98	0	0	0	Blank(s)	Blank(s)	Blank(s)	0	98	Positive	Positive	Not 2010+ Breast	Not 2010+ Breast		Alive or dead of other cause	Alive or dead due to cancer	128	Alive	1st of 2 or more primaries	No/Unknown	None/Unknown	No radiation and/or cancer-directed surgery	Iowa - 1973+
Unknown	83	2011	White	C50.1-Central portion of breast	Moderately differentiated; Grade II	Right - origin of primary	Positive histology	IIA	T2	N0	M0	Localized	40	Surgery performed	35	100	0	0	10	10	0	0	0	0	3	3	0	1	0	Positive	Positive	Negative	Her2-/HR+		Alive or dead of other cause	Alive or dead due to cancer	43	Alive	One primary only	No/Unknown	None/Unknown	No radiation and/or cancer-directed surgery	San Francisco-Oakland SMSA - 1973+
Single (never married)	81	2010	White	C50.0-Nipple	Poorly differentiated; Grade III	Left - origin of primary	Positive histology	IIIB	T4c	N1a	M0	Regional	41	Surgery performed	32	612	250	0	10	10	2	987	987	0	6	6	0	2	2	Positive	Positive	Positive	Her2+/HR+		Dead (attributable to this cancer dx)	Alive or dead due to cancer	53	Dead	One primary only	No/Unknown	None/Unknown	No radiation and/or cancer-directed surgery	Louisiana - 2000+
Married (including common law)	80	2009	White	C50.9-Breast, NOS	Moderately differentiated; Grade II	Left - origin of primary	Positive histology	IIB	T2	N1mi	M0	Regional	41	Surgery performed	25	200	130	0	10	20	1	987	987	0	3	3	0	3	1	Positive	Negative	Not 2010+ Breast	Not 2010+ Breast		Dead (attributable to this cancer dx)	Alive or dead due to cancer	37	Dead	1st of 2 or more primaries	Yes	Beam radiation	Radiation after surgery	Louisiana - 2000+
Married (including common law)	76	2005	White	C50.8-Overlapping lesion of breast	Well differentiated; Grade I	Left - origin of primary	Positive histology	I	T1b	N0	M0	Localized	51	Surgery performed	10	100	0	0	997	997	0	0	0	20	3	3	0	17	0	Unknown	Unknown	Not 2010+ Breast	Not 2010+ Breast		Alive or dead of other cause	Alive or dead due to cancer	115	Alive	One primary only	No/Unknown	None/Unknown	No radiation and/or cancer-directed surgery	California excluding SF/SJM/LA - 2000+
Married (including common law)	82	2011	White	C50.9-Breast, NOS	Unknown	Left - origin of primary	Positive histology	IIIC	T3	N3NOS	M0	Regional	40	Surgery performed	35	190	815	0	10	10	6	987	987	987	3	3	0	11	6	Positive	Positive	Negative	Her2-/HR+		Alive or dead of other cause	Alive or dead due to cancer	43	Alive	One primary only	No/Unknown	None/Unknown	No radiation and/or cancer-directed surgery	Los Angeles - 1992+
Married (including common law)	77	2006	White	C50.9-Breast, NOS	Unknown	Right - origin of primary	Positive histology	I	T1b	N0	M0	Localized	41	Surgery performed	10	100	0	0	999	999	0	0	0	0	3	3	0	2	0	Unknown	Unknown	Not 2010+ Breast	Not 2010+ Breast		Alive or dead of other cause	Dead (attributable to causes other than this cancer dx)	67	Dead	1st of 2 or more primaries	No/Unknown	None/Unknown	No radiation and/or cancer-directed surgery	San Jose-Monterey - 1992+
Married (including common law)	83	2011	White	C50.1-Central portion of breast	Moderately differentiated; Grade II	Left - origin of primary	Positive histology	IIA	T2	N0	M0	Localized	51	Surgery performed	26	100	0	0	10	20	0	0	0	0	3	3	0	13	0	Positive	Negative	Negative	Her2-/HR+		N/A not first tumor	N/A not first tumor	43	Alive	2nd of 2 or more primaries	No/Unknown	None/Unknown	No radiation and/or cancer-directed surgery	Greater Georgia - 2000+
Married (including common law)	80	2009	White	C50.9-Breast, NOS	Moderately differentiated; Grade II	Left - origin of primary	Positive histology	I	T1c	N0	M0	Localized	50	Surgery performed	18	100	0	0	10	10	0	0	0	0	3	3	9	3	0	Positive	Positive	Not 2010+ Breast	Not 2010+ Breast		Alive or dead of other cause	Alive or dead due to cancer	66	Alive	One primary only	No/Unknown	None/Unknown	No radiation and/or cancer-directed surgery	Iowa - 1973+
Married (including common law)	77	2005	White	C50.9-Breast, NOS	Moderately differentiated; Grade II	Left - origin of primary	Positive histology	I	T1c	N0(i-)	M0	Localized	40	Surgery performed	13	100	0	0	10	10	0	1	1	0	3	3	0	3	0	Positive	Positive	Not 2010+ Breast	Not 2010+ Breast		N/A not first tumor	N/A not first tumor	114	Alive	3rd of 3 or more primaries	No/Unknown	None/Unknown	No radiation and/or cancer-directed surgery	San Francisco-Oakland SMSA - 1973+
Married (including common law)	78	2006	White	C50.4-Upper-outer quadrant of breast	Moderately differentiated; Grade II	Left - origin of primary	Positive exfoliative cytology, no positive histology	I	T1c	N0(i-)	M0	Localized	50	Surgery performed	18	100	0	0	998	998	0	1	1	0	3	3	0	9	0	Unknown	Unknown	Not 2010+ Breast	Not 2010+ Breast		Alive or dead of other cause	Alive or dead due to cancer	102	Alive	One primary only	No/Unknown	None/Unknown	No radiation and/or cancer-directed surgery	New Jersey - 2000+
Widowed	81	2010	White	C50.1-Central portion of breast	Moderately differentiated; Grade II	Left - origin of primary	Positive histology	IIA	T1c	N1mi	M0	Regional	41	Surgery performed	19	100	150	0	10	10	1	987	987	0	3	3	0	1	1	Positive	Positive	Negative	Her2-/HR+		Alive or dead of other cause	Dead (attributable to causes other than this cancer dx)	54	Dead	One primary only	No/Unknown	None/Unknown	No radiation and/or cancer-directed surgery	New Jersey - 2000+
Married (including common law)	81	2009	White	C50.9-Breast, NOS	Moderately differentiated; Grade II	Right - origin of primary	Positive histology	IIA	T1c	N1mi	M0	Regional	51	Surgery performed	11	100	150	0	10	10	1	987	987	0	3	3	0	2	1	Positive	Positive	Not 2010+ Breast	Not 2010+ Breast		Alive or dead of other cause	Alive or dead due to cancer	66	Alive	One primary only	Yes	None/Unknown	No radiation and/or cancer-directed surgery	Los Angeles - 1992+
Single (never married)	79	2007	White	C50.9-Breast, NOS	Moderately differentiated; Grade II	Left - origin of primary	Positive histology	I	T1c	N0	M0	Regional	51	Surgery performed	15	200	0	0	10	10	0	0	0	0	3	3	0	7	0	Positive	Positive	Not 2010+ Breast	Not 2010+ Breast		Alive or dead of other cause	Alive or dead due to cancer	90	Alive	One primary only	No/Unknown	None/Unknown	No radiation and/or cancer-directed surgery	Los Angeles - 1992+
Widowed	76	2004	White	C50.1-Central portion of breast	Poorly differentiated; Grade III	Left - origin of primary	Positive histology	IIIA	T1c	N2a	M0	Regional	51	Surgery performed	20	100	250	0	10	10	5	987	987	30	3	3	0	26	6	Positive	Positive	Not 2010+ Breast	Not 2010+ Breast		Alive or dead of other cause	Dead (attributable to causes other than this cancer dx)	113	Dead	1st of 2 or more primaries	Yes	Beam radiation	Radiation after surgery	New Jersey - 2000+
Divorced	79	2007	White	C50.1-Central portion of breast	Moderately differentiated; Grade II	Right - origin of primary	Positive histology	IIA	T2	N0	M0	Localized	51	Surgery performed	50	100	0	0	10	10	0	0	0	20	3	3	0	20	0	Positive	Positive	Not 2010+ Breast	Not 2010+ Breast		Dead (attributable to this cancer dx)	Alive or dead due to cancer	47	Dead	1st of 2 or more primaries	No/Unknown	Beam radiation	Radiation after surgery	California excluding SF/SJM/LA - 2000+
Married (including common law)	79	2007	White	C50.9-Breast, NOS	Poorly differentiated; Grade III	Left - origin of primary	Positive histology	IV	T2	NX	M1	Distant	0	Not recommended	49	100	999	40	10	20	98	987	987	50	1	0	0	0	98	Positive	Negative	Not 2010+ Breast	Not 2010+ Breast		Dead (attributable to this cancer dx)	Alive or dead due to cancer	28	Dead	One primary only	No/Unknown	None/Unknown	No radiation and/or cancer-directed surgery	New Jersey - 2000+
Widowed	78	2006	White	C50.4-Upper-outer quadrant of breast	Moderately differentiated; Grade II	Right - origin of primary	Positive histology	IIB	T2	N1a	M0	Regional	51	Surgery performed	40	100	250	0	10	10	2	987	987	0	3	3	0	9	2	Positive	Positive	Not 2010+ Breast	Not 2010+ Breast		Alive or dead of other cause	Dead (attributable to causes other than this cancer dx)	87	Dead	One primary only	Yes	None/Unknown	No radiation and/or cancer-directed surgery	California excluding SF/SJM/LA - 2000+
Unknown	83	2012	White	C50.9-Breast, NOS	Unknown	Left - origin of primary	Positive histology	UNK Stage	T4b	N1NOS	MX	Regional	50	Surgery performed	22	605	260	99	10	10	99	987	987	0	3	3	9	13	1	Positive	Positive	Negative	Her2-/HR+		N/A not first tumor	N/A not first tumor	29	Alive	3rd of 3 or more primaries	No/Unknown	None/Unknown	No radiation and/or cancer-directed surgery	Louisiana - 2000+
Married (including common law)	79	2007	White	C50.9-Breast, NOS	Poorly differentiated; Grade III	Left - origin of primary	Positive histology	IIA	T1b	N1a	M0	Regional	41	Surgery performed	8	100	250	0	10	10	1	987	987	0	3	3	0	7	1	Positive	Positive	Not 2010+ Breast	Not 2010+ Breast		Alive or dead of other cause	Alive or dead due to cancer	87	Alive	One primary only	No/Unknown	None/Unknown	No radiation and/or cancer-directed surgery	New Jersey - 2000+
Married (including common law)	85	2013	White	C50.1-Central portion of breast	Poorly differentiated; Grade III	Left - origin of primary	Positive histology	IIA	T2	N0(i-)	M0	Localized	41	Surgery performed	21	100	0	0	10	10	0	1	0	20	3	3	0	3	0	Positive	Positive	Negative	Her2-/HR+		Alive or dead of other cause	Alive or dead due to cancer	15	Alive	One primary only	No/Unknown	None/Unknown	No radiation and/or cancer-directed surgery	Los Angeles - 1992+
Married (including common law)	83	2012	White	C50.1-Central portion of breast	Moderately differentiated; Grade II	Right - origin of primary	Positive histology	I	T1c	N0(i-)	M0	Localized	61	Surgery performed	15	100	0	0	10	10	0	1	0	0	3	3	0	1	0	Positive	Positive	Borderline	Unknown		Alive or dead of other cause	Alive or dead due to cancer	27	Alive	One primary only	No/Unknown	None/Unknown	No radiation and/or cancer-directed surgery	Los Angeles - 1992+
Married (including common law)	83	2012	White	C50.4-Upper-outer quadrant of breast	Moderately differentiated; Grade II	Right - origin of primary	Positive histology	IIIA	T2	N2a	M0	Regional	51	Surgery performed	21	100	250	0	10	10	5	987	987	20	3	3	0	15	5	Positive	Positive	Negative	Her2-/HR+		Alive or dead of other cause	Dead (attributable to causes other than this cancer dx)	21	Dead	One primary only	Yes	None/Unknown	No radiation and/or cancer-directed surgery	Los Angeles - 1992+
Widowed	84	2013	White	C50.1-Central portion of breast	Moderately differentiated; Grade II	Right - origin of primary	Positive histology	I	T1c	N0(i-)	M0	Regional	41	Surgery performed	20	200	0	0	10	10	0	1	0	0	3	3	0	2	0	Positive	Positive	Negative	Her2-/HR+		Alive or dead of other cause	Alive or dead due to cancer	17	Alive	One primary only	No/Unknown	None/Unknown	No radiation and/or cancer-directed surgery	Hawaii - 1973+
Married (including common law)	84	2012	White	C50.1-Central portion of breast	Moderately differentiated; Grade II	Right - origin of primary	Positive histology	I	T1c	N0	M0	Localized	41	Surgery performed	13	100	0	0	10	10	0	0	0	0	3	3	0	10	0	Positive	Positive	Negative	Her2-/HR+		N/A not first tumor	N/A not first tumor	29	Alive	3rd of 3 or more primaries	No/Unknown	None/Unknown	No radiation and/or cancer-directed surgery	Connecticut - 1973+
Married (including common law)	83	2011	White	C50.9-Breast, NOS	Moderately differentiated; Grade II	Right - origin of primary	Positive histology	I	T1c	N0	M0	Localized	41	Surgery performed	15	100	0	0	10	10	0	0	0	20	3	3	0	2	0	Positive	Positive	Negative	Her2-/HR+		N/A not first tumor	N/A not first tumor	41	Alive	2nd of 2 or more primaries	No/Unknown	None/Unknown	No radiation and/or cancer-directed surgery	San Francisco-Oakland SMSA - 1973+
Married (including common law)	77	2005	White	C50.1-Central portion of breast	Poorly differentiated; Grade III	Left - origin of primary	Positive histology	I	T1c	N0	M0	Localized	41	Surgery performed	19	100	0	0	10	10	0	0	0	30	Blank(s)	Blank(s)	Blank(s)	5	0	Positive	Positive	Not 2010+ Breast	Not 2010+ Breast		Alive or dead of other cause	Alive or dead due to cancer	113	Alive	One primary only	No/Unknown	None/Unknown	No radiation and/or cancer-directed surgery	Seattle (Puget Sound) - 1974+
Married (including common law)	84	2013	White	C50.1-Central portion of breast	Poorly differentiated; Grade III	Right - origin of primary	Positive histology	IIA	T2	N0	M0	Regional	51	Surgery performed	21	200	0	0	10	10	0	0	0	20	3	3	0	6	0	Positive	Positive	Negative	Her2-/HR+		Alive or dead of other cause	Alive or dead due to cancer	17	Alive	One primary only	No/Unknown	None/Unknown	No radiation and/or cancer-directed surgery	Utah - 1973+
Married (including common law)	78	2006	White	C50.2-Upper-inner quadrant of breast	Well differentiated; Grade I	Left - origin of primary	Positive histology	I	T1c	N0	M0	Localized	51	Surgery performed	15	100	0	0	10	10	0	0	0	0	3	3	0	26	0	Positive	Positive	Not 2010+ Breast	Not 2010+ Breast		Alive or dead of other cause	Alive or dead due to cancer	100	Alive	1st of 2 or more primaries	Yes	None/Unknown	No radiation and/or cancer-directed surgery	Hawaii - 1973+
Married (including common law)	80	2009	White	C50.1-Central portion of breast	Well differentiated; Grade I	Right - origin of primary	Positive histology	I	T1c	N0	M0	Localized	41	Surgery performed	13	100	0	0	10	20	0	0	0	0	3	3	0	1	0	Positive	Negative	Not 2010+ Breast	Not 2010+ Breast		Alive or dead of other cause	Dead (attributable to causes other than this cancer dx)	52	Dead	One primary only	No/Unknown	None/Unknown	No radiation and/or cancer-directed surgery	Iowa - 1973+
Married (including common law)	79	2007	White	C50.8-Overlapping lesion of breast	Poorly differentiated; Grade III	Right - origin of primary	Positive histology	I	T1c	N0	M0	Localized	51	Surgery performed	16	100	0	0	10	10	0	0	0	20	3	3	0	15	0	Positive	Positive	Not 2010+ Breast	Not 2010+ Breast		Alive or dead of other cause	Dead (attributable to causes other than this cancer dx)	57	Dead	1st of 2 or more primaries	No/Unknown	None/Unknown	No radiation and/or cancer-directed surgery	California excluding SF/SJM/LA - 2000+
Widowed	83	2011	White	C50.0-Nipple	Moderately differentiated; Grade II	Left - origin of primary	Positive histology	IIIA	T2	N2a	M0	Regional	51	Surgery performed	22	200	250	0	10	10	4	987	987	30	3	3	0	6	4	Positive	Positive	Negative	Her2-/HR+		Alive or dead of other cause	Alive or dead due to cancer	40	Alive	One primary only	No/Unknown	Beam radiation	Radiation after surgery	California excluding SF/SJM/LA - 2000+
Divorced	78	2006	Black	C50.9-Breast, NOS	Poorly differentiated; Grade III	Right - origin of primary	Positive histology	IIB	T3	N0(i-)	M0	Localized	41	Surgery performed	70	100	0	0	10	10	0	1	0	20	3	3	0	10	0	Positive	Positive	Not 2010+ Breast	Not 2010+ Breast		Alive or dead of other cause	Dead (attributable to causes other than this cancer dx)	6	Dead	One primary only	No/Unknown	Beam radiation	Radiation after surgery	New Jersey - 2000+
Married (including common law)	81	2009	White	C50.1-Central portion of breast	Poorly differentiated; Grade III	Right - origin of primary	Positive histology	IIA	T2	N0(i+)	M0	Localized	41	Surgery performed	23	100	50	0	10	10	0	987	987	0	3	3	0	5	0	Positive	Positive	Not 2010+ Breast	Not 2010+ Breast		Alive or dead of other cause	Alive or dead due to cancer	63	Alive	One primary only	No/Unknown	None/Unknown	No radiation and/or cancer-directed surgery	California excluding SF/SJM/LA - 2000+
Married (including common law)	81	2010	Black	C50.0-Nipple	Well differentiated; Grade I	Right - origin of primary	Positive histology	I	T1c	N0	M0	Localized	51	Surgery performed	15	100	0	0	10	20	0	0	0	20	3	3	0	15	0	Positive	Negative	Negative	Her2-/HR+		N/A not first tumor	N/A not first tumor	43	Dead	2nd of 2 or more primaries	No/Unknown	None/Unknown	No radiation and/or cancer-directed surgery	Greater Georgia - 2000+
Married (including common law)	83	2011	White	C50.1-Central portion of breast	Moderately differentiated; Grade II	Right - origin of primary	Positive histology	IIIC	T2	N3a	M0	Regional	51	Surgery performed	35	200	250	0	10	10	13	987	987	20	3	3	0	18	13	Positive	Positive	Negative	Her2-/HR+		N/A not first tumor	N/A not first tumor	39	Alive	2nd of 2 or more primaries	No/Unknown	Beam radiation	Radiation after surgery	Greater Georgia - 2000+
Widowed	78	2006	Black	C50.1-Central portion of breast	Poorly differentiated; Grade III	Left - origin of primary	Positive histology	IIA	T2	N0	M0	Regional	51	Surgery performed	30	200	0	0	10	10	0	0	0	0	Blank(s)	Blank(s)	Blank(s)	10	0	Positive	Positive	Not 2010+ Breast	Not 2010+ Breast		Alive or dead of other cause	Dead (attributable to causes other than this cancer dx)	73	Dead	One primary only	No/Unknown	None/Unknown	No radiation and/or cancer-directed surgery	Iowa - 1973+
Married (including common law)	82	2010	White	C50.4-Upper-outer quadrant of breast	Moderately differentiated; Grade II	Left - origin of primary	Positive histology	IV	T1b	N1mi	M1	Distant	41	Surgery performed	8	100	150	40	10	10	1	987	987	0	6	6	0	1	1	Positive	Positive	Negative	Her2-/HR+		Dead (attributable to this cancer dx)	Alive or dead due to cancer	47	Dead	One primary only	Yes	Beam radiation	Radiation after surgery	Detroit (Metropolitan) - 1973+
Married (including common law)	84	2013	White	C50.9-Breast, NOS	Moderately differentiated; Grade II	Left - origin of primary	Positive histology	IIA	T2	N0(i-)	M0	Regional	41	Surgery performed	28	200	0	0	10	10	0	1	0	20	3	3	0	2	0	Positive	Positive	Negative	Her2-/HR+		Alive or dead of other cause	Alive or dead due to cancer	14	Alive	One primary only	No/Unknown	None/Unknown	No radiation and/or cancer-directed surgery	Detroit (Metropolitan) - 1973+
Widowed	81	2009	White	C50.1-Central portion of breast	Poorly differentiated; Grade III	Right - origin of primary	Positive histology	IV	T1c	N1NOS	M1	Distant	22	Surgery performed	20	100	600	50	20	10	98	987	987	30	3	3	3	95	95	Negative	Positive	Not 2010+ Breast	Not 2010+ Breast		Dead (attributable to this cancer dx)	Alive or dead due to cancer	34	Dead	One primary only	No/Unknown	None/Unknown	No radiation and/or cancer-directed surgery	California excluding SF/SJM/LA - 2000+
Married (including common law)	82	2010	White	C50.9-Breast, NOS	Poorly differentiated; Grade III	Left - origin of primary	Positive histology	UNK Stage	TX	N0	MX	Unknown/unstaged	41	Surgery performed	999	999	0	99	10	10	0	0	0	0	0	3	0	98	0	Positive	Positive	Negative	Her2-/HR+		N/A not first tumor	N/A not first tumor	49	Alive	2nd of 2 or more primaries	No/Unknown	None/Unknown	No radiation and/or cancer-directed surgery	Kentucky - 2000+
Married (including common law)	82	2010	White	C50.1-Central portion of breast	Moderately differentiated; Grade II	Left - origin of primary	Positive histology	IIB	T2	N1a	M0	Regional	51	Surgery performed	22	200	250	0	10	20	1	987	987	50	3	3	0	11	1	Positive	Negative	Negative	Her2-/HR+		Alive or dead of other cause	Alive or dead due to cancer	49	Alive	One primary only	No/Unknown	None/Unknown	No radiation and/or cancer-directed surgery	Kentucky - 2000+
Unknown	83	2012	Unknown	C50.1-Central portion of breast	Well differentiated; Grade I	Left - origin of primary	Positive histology	UNK Stage	TX	N1	MX	Regional	0	Not recommended	999	999	600	99	10	10	98	987	987	60	1	1	9	95	95	Positive	Positive	Negative	Her2-/HR+		Alive or dead of other cause	Alive or dead due to cancer	0	Alive	One primary only	No/Unknown	None/Unknown	No radiation and/or cancer-directed surgery	California excluding SF/SJM/LA - 2000+
Married (including common law)	84	2012	White	C50.8-Overlapping lesion of breast	Moderately differentiated; Grade II	Left - origin of primary	Positive histology	I	T1c	N0(i-)	M0	Localized	41	Surgery performed	20	100	0	0	10	10	0	1	0	0	3	3	0	1	0	Positive	Positive	Negative	Her2-/HR+		Alive or dead of other cause	Alive or dead due to cancer	25	Alive	1st of 2 or more primaries	No/Unknown	None/Unknown	No radiation and/or cancer-directed surgery	Los Angeles - 1992+
Married (including common law)	79	2007	White	C50.1-Central portion of breast	Moderately differentiated; Grade II	Left - origin of primary	Positive histology	IIIB	T4b	N0	M0	Regional	40	Surgery performed	18	510	0	0	10	10	0	0	0	0	3	3	0	2	0	Positive	Positive	Not 2010+ Breast	Not 2010+ Breast		N/A not first tumor	N/A not first tumor	23	Dead	2nd of 2 or more primaries	No/Unknown	None/Unknown	No radiation and/or cancer-directed surgery	New Mexico - 1973+
Married (including common law)	82	2010	White	C50.9-Breast, NOS	Poorly differentiated; Grade III	Right - origin of primary	Positive histology	I	T1b	N0	M0	Localized	22	Surgery performed	10	100	0	0	10	10	98	0	0	0	3	0	0	0	98	Positive	Positive	Negative	Her2-/HR+		N/A not first tumor	N/A not first tumor	49	Alive	2nd of 2 or more primaries	No/Unknown	None/Unknown	No radiation and/or cancer-directed surgery	New Mexico - 1973+
Married (including common law)	85	2013	Black	C50.4-Upper-outer quadrant of breast	Poorly differentiated; Grade III	Right - origin of primary	Positive histology	IIA	T2	N0	M0	Localized	20	Surgery performed	24	100	0	0	10	10	0	0	0	0	3	3	0	4	0	Positive	Positive	Negative	Her2-/HR+		Alive or dead of other cause	Alive or dead due to cancer	3	Alive	One primary only	No/Unknown	None/Unknown	No radiation and/or cancer-directed surgery	New Jersey - 2000+
Divorced	77	2005	White	C50.8-Overlapping lesion of breast	Unknown	Left - origin of primary	Positive histology	IIA	T2	N0(i-)	M0	Localized	50	Surgery performed	43	100	0	0	10	10	0	1	1	30	3	3	0	19	0	Positive	Positive	Not 2010+ Breast	Not 2010+ Breast		N/A not first tumor	N/A not first tumor	57	Dead	2nd of 2 or more primaries	No/Unknown	None/Unknown	No radiation and/or cancer-directed surgery	New Jersey - 2000+
Divorced	79	2007	White	C50.8-Overlapping lesion of breast	Moderately differentiated; Grade II	Right - origin of primary	Positive histology	I	T1c	N0(i-)	M0	Localized	41	Surgery performed	12	100	0	0	10	10	0	1	0	0	3	3	0	3	0	Positive	Positive	Not 2010+ Breast	Not 2010+ Breast		N/A not first tumor	N/A not first tumor	84	Alive	2nd of 2 or more primaries	No/Unknown	None/Unknown	No radiation and/or cancer-directed surgery	California excluding SF/SJM/LA - 2000+
Unknown	84	2012	Black	C50.9-Breast, NOS	Poorly differentiated; Grade III	Left - origin of primary	Positive histology	IV	T4d	N2NOS	M1	Distant	51	Surgery performed	70	600	620	44	10	10	9	987	987	0	3	3	0	11	9	Positive	Positive	Negative	Her2-/HR+		Dead (attributable to this cancer dx)	Alive or dead due to cancer	21	Dead	One primary only	No/Unknown	None/Unknown	No radiation and/or cancer-directed surgery	Atlanta (Metropolitan) - 1975+
Married (including common law)	79	2007	White	C50.8-Overlapping lesion of breast	Moderately differentiated; Grade II	Right - origin of primary	Positive histology	I	T1c	N0	M0	Localized	51	Surgery performed	15	100	0	0	10	10	0	0	0	30	3	3	0	8	0	Positive	Positive	Not 2010+ Breast	Not 2010+ Breast		Alive or dead of other cause	Alive or dead due to cancer	84	Alive	One primary only	No/Unknown	None/Unknown	No radiation and/or cancer-directed surgery	New Mexico - 1973+
Married (including common law)	77	2005	White	C50.9-Breast, NOS	Poorly differentiated; Grade III	Left - origin of primary	Positive histology	IIA	T2	N0(i-)	M0	Localized	51	Surgery performed	45	100	0	0	10	10	0	1	0	0	Blank(s)	Blank(s)	Blank(s)	5	0	Positive	Positive	Not 2010+ Breast	Not 2010+ Breast		N/A not first tumor	N/A not first tumor	30	Dead	3rd of 3 or more primaries	No/Unknown	None/Unknown	No radiation and/or cancer-directed surgery	Seattle (Puget Sound) - 1974+
Single (never married)	75	2005	White	C50.9-Breast, NOS	Poorly differentiated; Grade III	Right - origin of primary	Positive histology	IIIB	T4b	N2a	M0	Regional	51	Surgery performed	30	510	250	0	10	10	5	987	987	0	3	3	0	10	5	Positive	Positive	Not 2010+ Breast	Not 2010+ Breast		Alive or dead of other cause	Dead (attributable to causes other than this cancer dx)	63	Dead	One primary only	Yes	Beam radiation	Radiation after surgery	San Jose-Monterey - 1992+
Married (including common law)	79	2009	White	C50.1-Central portion of breast	Moderately differentiated; Grade II	Left - origin of primary	Positive histology	I	T1c	N0	M0	Localized	41	Surgery performed	11	100	0	0	10	10	98	0	0	0	3	0	0	0	98	Positive	Positive	Not 2010+ Breast	Not 2010+ Breast		Alive or dead of other cause	Dead (attributable to causes other than this cancer dx)	10	Dead	1st of 2 or more primaries	No/Unknown	None/Unknown	No radiation and/or cancer-directed surgery	Iowa - 1973+
Single (never married)	74	2004	White	C50.4-Upper-outer quadrant of breast	Moderately differentiated; Grade II	Right - origin of primary	Positive histology	I	T1c	N0	M0	Localized	51	Surgery performed	14	100	0	0	10	10	0	0	0	0	3	3	0	1	0	Positive	Positive	Not 2010+ Breast	Not 2010+ Breast		Alive or dead of other cause	Alive or dead due to cancer	131	Alive	One primary only	Yes	None/Unknown	No radiation and/or cancer-directed surgery	Utah - 1973+
Married (including common law)	80	2010	White	C50.4-Upper-outer quadrant of breast	Poorly differentiated; Grade III	Left - origin of primary	Positive histology	IIIB	T4d	N2NOS	M0	Regional	51	Surgery performed	30	750	620	0	10	10	7	987	987	30	3	3	0	12	7	Positive	Positive	Negative	Her2-/HR+		Alive or dead of other cause	Alive or dead due to cancer	59	Alive	1st of 2 or more primaries	Yes	Beam radiation	Radiation after surgery	Greater Georgia - 2000+
Married (including common law)	80	2010	White	C50.0-Nipple	Moderately differentiated; Grade II	Right - origin of primary	Positive histology	IIA	T1c	N1a	M0	Regional	41	Surgery performed	20	100	260	0	10	10	1	987	987	0	3	3	0	12	1	Positive	Positive	Negative	Her2-/HR+		Alive or dead of other cause	Alive or dead due to cancer	59	Alive	1st of 2 or more primaries	No/Unknown	None/Unknown	No radiation and/or cancer-directed surgery	New Jersey - 2000+
Widowed	74	2004	White	C50.9-Breast, NOS	Poorly differentiated; Grade III	Right - origin of primary	Positive histology	I	T1c	N0(i-)	M0	Localized	51	Surgery performed	11	100	0	0	10	10	0	1	1	0	3	3	0	14	0	Positive	Positive	Not 2010+ Breast	Not 2010+ Breast		Alive or dead of other cause	Alive or dead due to cancer	131	Alive	One primary only	No/Unknown	None/Unknown	No radiation and/or cancer-directed surgery	New Jersey - 2000+
Widowed	78	2008	White	C50.1-Central portion of breast	Poorly differentiated; Grade III	Left - origin of primary	Positive histology	IIIC	T2	N3NOS	M0	Regional	51	Surgery performed	24	100	820	0	10	10	17	987	987	0	3	3	0	18	17	Positive	Positive	Not 2010+ Breast	Not 2010+ Breast		Alive or dead of other cause	Dead (attributable to causes other than this cancer dx)	50	Dead	One primary only	No/Unknown	Beam radiation	Radiation after surgery	California excluding SF/SJM/LA - 2000+
Married (including common law)	78	2008	White	C50.1-Central portion of breast	Moderately differentiated; Grade II	Left - origin of primary	Positive histology	I	T1c	N0	M0	Localized	51	Surgery performed	18	100	0	0	998	998	98	0	0	30	3	3	0	6	0	Unknown	Unknown	Not 2010+ Breast	Not 2010+ Breast		Dead (attributable to this cancer dx)	Alive or dead due to cancer	20	Dead	One primary only	No/Unknown	None/Unknown	No radiation and/or cancer-directed surgery	California excluding SF/SJM/LA - 2000+
Married (including common law)	77	2007	White	C50.1-Central portion of breast	Poorly differentiated; Grade III	Right - origin of primary	Positive histology	UNK Stage	T2	N1a	MX	Regional	51	Surgery performed	30	200	600	99	10	20	3	987	987	0	3	3	0	14	3	Positive	Negative	Not 2010+ Breast	Not 2010+ Breast		N/A not first tumor	N/A not first tumor	25	Dead	2nd of 2 or more primaries	Yes	None/Unknown	No radiation and/or cancer-directed surgery	California excluding SF/SJM/LA - 2000+
Married (including common law)	82	2012	White	C50.0-Nipple	Moderately differentiated; Grade II	Right - origin of primary	Positive histology	IIIA	T1c	N2a	M0	Regional	51	Surgery performed	19	100	250	0	10	10	6	987	987	0	3	3	0	21	6	Positive	Positive	Negative	Her2-/HR+		N/A not first tumor	N/A not first tumor	34	Alive	2nd of 2 or more primaries	Yes	Beam radiation	Radiation after surgery	California excluding SF/SJM/LA - 2000+
Widowed	80	2010	White	C50.1-Central portion of breast	Moderately differentiated; Grade II	Right - origin of primary	Positive histology	IIA	T1c	N1a	M0	Regional	51	Surgery performed	14	100	250	0	10	10	3	987	987	0	3	3	0	15	3	Positive	Positive	Negative	Her2-/HR+		N/A not first tumor	N/A not first tumor	58	Alive	2nd of 2 or more primaries	No/Unknown	None/Unknown	No radiation and/or cancer-directed surgery	California excluding SF/SJM/LA - 2000+
Widowed	81	2011	White	C50.9-Breast, NOS	Moderately differentiated; Grade II	Left - origin of primary	Positive histology	IIIA	T2	N2a	M0	Regional	50	Surgery performed	35	200	250	0	10	10	4	987	987	0	3	3	0	14	4	Positive	Positive	Negative	Her2-/HR+		Alive or dead of other cause	Dead (attributable to causes other than this cancer dx)	41	Dead	One primary only	No/Unknown	None/Unknown	No radiation and/or cancer-directed surgery	New Jersey - 2000+
Married (including common law)	83	2012	Black	C50.8-Overlapping lesion of breast	Poorly differentiated; Grade III	Right - origin of primary	Positive histology	IIIB	T4a	N1	M0	Regional	0	Not recommended	44	400	257	0	10	10	98	987	987	987	0	0	0	0	98	Positive	Positive	Negative	Her2-/HR+		N/A not first tumor	N/A not first tumor	9	Dead	2nd of 2 or more primaries	No/Unknown	None/Unknown	No radiation and/or cancer-directed surgery	San Jose-Monterey - 1992+
Married (including common law)	83	2013	White	C50.1-Central portion of breast	Moderately differentiated; Grade II	Left - origin of primary	Positive histology	I	T1b	N0	M0	Localized	22	Surgery performed	9	100	0	0	10	10	98	0	0	0	3	0	0	0	98	Positive	Positive	Negative	Her2-/HR+		N/A not first tumor	N/A not first tumor	22	Alive	2nd of 2 or more primaries	No/Unknown	Beam radiation	Radiation after surgery	Atlanta (Metropolitan) - 1975+
Married (including common law)	81	2011	White	C50.0-Nipple	Moderately differentiated; Grade II	Right - origin of primary	Positive histology	IIA	T1a	N1mi	M0	Regional	41	Surgery performed	5	200	150	0	10	10	1	987	987	30	3	3	0	6	1	Positive	Positive	Negative	Her2-/HR+		Alive or dead of other cause	Alive or dead due to cancer	45	Alive	1st of 2 or more primaries	No/Unknown	None/Unknown	No radiation and/or cancer-directed surgery	California excluding SF/SJM/LA - 2000+
Widowed	78	2008	White	C50.1-Central portion of breast	Poorly differentiated; Grade III	Right - origin of primary	Positive histology	IIB	T2	N1a	M0	Regional	41	Surgery performed	25	100	250	0	10	10	1	987	987	0	3	3	0	21	1	Positive	Positive	Not 2010+ Breast	Not 2010+ Breast		Alive or dead of other cause	Alive or dead due to cancer	81	Alive	One primary only	No/Unknown	Beam radiation	Radiation after surgery	California excluding SF/SJM/LA - 2000+
Married (including common law)	75	2004	White	C50.8-Overlapping lesion of breast	Unknown	Right - origin of primary	Positive histology	I	T1b	N0(i-)	M0	Localized	20	Surgery performed	10	100	0	0	10	10	0	1	0	0	3	3	0	6	0	Positive	Positive	Not 2010+ Breast	Not 2010+ Breast		N/A not first tumor	N/A not first tumor	88	Dead	2nd of 2 or more primaries	No/Unknown	None/Unknown	No radiation and/or cancer-directed surgery	California excluding SF/SJM/LA - 2000+
Married (including common law)	76	2006	White	C50.1-Central portion of breast	Moderately differentiated; Grade II	Right - origin of primary	Positive histology	I	T1c	N0(i-)	M0	Localized	51	Surgery performed	15	100	0	0	10	10	0	1	0	0	3	3	0	3	0	Positive	Positive	Not 2010+ Breast	Not 2010+ Breast		N/A not first tumor	N/A not first tumor	92	Dead	2nd of 2 or more primaries	No/Unknown	None/Unknown	No radiation and/or cancer-directed surgery	California excluding SF/SJM/LA - 2000+
Widowed	76	2006	White	C50.0-Nipple	Poorly differentiated; Grade III	Right - origin of primary	Positive histology	IIIC	T2	N3a	M0	Regional	51	Surgery performed	24	200	250	0	10	10	12	987	987	0	3	3	0	14	12	Positive	Positive	Not 2010+ Breast	Not 2010+ Breast		Dead (attributable to this cancer dx)	Alive or dead due to cancer	90	Dead	One primary only	Yes	Beam radiation	Radiation after surgery	Los Angeles - 1992+
Married (including common law)	80	2010	White	C50.4-Upper-outer quadrant of breast	Well differentiated; Grade I	Right - origin of primary	Positive histology	I	T1c	N0(i-)	M0	Localized	40	Surgery performed	13	100	0	0	10	10	0	1	1	20	3	3	0	3	0	Positive	Positive	Borderline	Unknown		Alive or dead of other cause	Alive or dead due to cancer	56	Alive	One primary only	No/Unknown	None/Unknown	No radiation and/or cancer-directed surgery	New Jersey - 2000+
Married (including common law)	78	2008	White	C50.4-Upper-outer quadrant of breast	Moderately differentiated; Grade II	Left - origin of primary	Positive histology	I	T1c	N0	M0	Localized	22	Surgery performed	20	100	0	0	10	10	0	0	0	50	3	3	0	4	0	Positive	Positive	Not 2010+ Breast	Not 2010+ Breast		Alive or dead of other cause	Alive or dead due to cancer	80	Alive	One primary only	No/Unknown	None/Unknown	No radiation and/or cancer-directed surgery	Kentucky - 2000+
Widowed	76	2005	White	C50.4-Upper-outer quadrant of breast	Well differentiated; Grade I	Left - origin of primary	Positive histology	IIB	T3	N0(i+)	M0	Localized	41	Surgery performed	60	100	0	0	10	10	0	2	0	20	3	3	0	10	0	Positive	Positive	Not 2010+ Breast	Not 2010+ Breast		N/A not first tumor	N/A not first tumor	15	Dead	2nd of 2 or more primaries	No/Unknown	None/Unknown	No radiation and/or cancer-directed surgery	New Jersey - 2000+
Married (including common law)	76	2006	Black	C50.9-Breast, NOS	Poorly differentiated; Grade III	Left - origin of primary	Positive histology	IIB	T2	N1mi	M0	Regional	51	Surgery performed	29	100	150	0	10	10	1	987	987	20	3	3	0	6	1	Positive	Positive	Not 2010+ Breast	Not 2010+ Breast		Alive or dead of other cause	Alive or dead due to cancer	104	Alive	One primary only	No/Unknown	None/Unknown	No radiation and/or cancer-directed surgery	Louisiana - 2000+
Married (including common law)	75	2005	White	C50.9-Breast, NOS	Poorly differentiated; Grade III	Right - origin of primary	Positive histology	IV	TX	N0	M1	Distant	0	Not recommended, contraindicated due to other cond; autopsy only (1973-2002)	999	100	0	40	10	10	98	0	0	0	1	0	0	0	98	Positive	Positive	Not 2010+ Breast	Not 2010+ Breast		Dead (attributable to this cancer dx)	Alive or dead due to cancer	10	Dead	One primary only	No/Unknown	None/Unknown	No radiation and/or cancer-directed surgery	New Jersey - 2000+
Married (including common law)	76	2005	White	C50.1-Central portion of breast	Moderately differentiated; Grade II	Left - origin of primary	Positive histology	IIA	T2	N0	M0	Localized	51	Surgery performed	40	100	0	0	10	10	0	0	0	0	3	3	0	11	0	Positive	Positive	Not 2010+ Breast	Not 2010+ Breast		Alive or dead of other cause	Dead (attributable to causes other than this cancer dx)	94	Dead	One primary only	No/Unknown	None/Unknown	No radiation and/or cancer-directed surgery	California excluding SF/SJM/LA - 2000+
Divorced	82	2012	White	C50.1-Central portion of breast	Moderately differentiated; Grade II	Right - origin of primary	Positive histology	IIA	T2	N0	M0	Regional	51	Surgery performed	33	200	0	0	10	10	0	0	0	0	3	3	0	25	0	Positive	Positive	Negative	Her2-/HR+		N/A not first tumor	N/A not first tumor	20	Dead	2nd of 2 or more primaries	No/Unknown	None/Unknown	No radiation and/or cancer-directed surgery	California excluding SF/SJM/LA - 2000+
Married (including common law)	80	2010	Black	C50.1-Central portion of breast	Poorly differentiated; Grade III	Right - origin of primary	Positive histology	IIIB	T4b	N1a	M0	Regional	51	Surgery performed	30	512	600	0	10	20	1	987	987	0	3	3	0	20	1	Positive	Negative	Negative	Her2-/HR+		Alive or dead of other cause	Alive or dead due to cancer	56	Alive	One primary only	Yes	Beam radiation	Radiation after surgery	Los Angeles - 1992+
Married (including common law)	76	2006	White	C50.1-Central portion of breast	Moderately differentiated; Grade II	Left - origin of primary	Positive histology	I	T1c	N0	M0	Localized	80	Surgery performed	15	100	0	0	10	20	0	0	0	0	3	3	0	1	0	Positive	Negative	Not 2010+ Breast	Not 2010+ Breast		Dead (attributable to this cancer dx)	Alive or dead due to cancer	81	Dead	One primary only	No/Unknown	None/Unknown	No radiation and/or cancer-directed surgery	Los Angeles - 1992+
Divorced	78	2008	White	C50.8-Overlapping lesion of breast	Moderately differentiated; Grade II	Right - origin of primary	Positive histology	I	T1c	N0	M0	Localized	51	Surgery performed	18	100	0	0	10	10	0	0	0	0	3	3	0	8	0	Positive	Positive	Not 2010+ Breast	Not 2010+ Breast		Alive or dead of other cause	Alive or dead due to cancer	80	Alive	1st of 2 or more primaries	No/Unknown	None/Unknown	No radiation and/or cancer-directed surgery	San Jose-Monterey - 1992+
Married (including common law)	78	2008	White	C50.9-Breast, NOS	Poorly differentiated; Grade III	Right - origin of primary	Positive histology	IIB	T2	N1a	M0	Regional	51	Surgery performed	22	100	250	0	10	10	2	987	987	0	3	3	0	4	2	Positive	Positive	Not 2010+ Breast	Not 2010+ Breast		Alive or dead of other cause	Alive or dead due to cancer	80	Alive	One primary only	Yes	Recommended, unknown if administered	No radiation and/or cancer-directed surgery	Hawaii - 1973+
Married (including common law)	82	2012	White	C50.3-Lower-inner quadrant of breast	Moderately differentiated; Grade II	Left - origin of primary	Positive histology	IIIA	T3	N2a	M0	Regional	51	Surgery performed	60	200	250	0	10	10	5	987	987	0	3	3	0	21	5	Positive	Positive	Negative	Her2-/HR+		N/A not first tumor	N/A not first tumor	13	Dead	2nd of 2 or more primaries	No/Unknown	Beam radiation	Radiation after surgery	Utah - 1973+
Married (including common law)	82	2012	White	C50.1-Central portion of breast	Moderately differentiated; Grade II	Right - origin of primary	Positive histology	I	T1c	N0	M0	Localized	51	Surgery performed	20	100	0	0	10	10	0	0	0	0	3	3	0	7	0	Positive	Positive	Negative	Her2-/HR+		Alive or dead of other cause	Alive or dead due to cancer	32	Alive	One primary only	No/Unknown	None/Unknown	No radiation and/or cancer-directed surgery	Iowa - 1973+
Married (including common law)	78	2007	White	C50.9-Breast, NOS	Undifferentiated; anaplastic; Grade IV	Only one side - side unspecified	Positive histology	IV	T0	N1	M1	Distant	0	Not recommended	0	950	600	50	20	20	98	987	987	987	1	0	3	0	98	Negative	Negative	Not 2010+ Breast	Not 2010+ Breast		Alive or dead of other cause	Dead (attributable to causes other than this cancer dx)	5	Dead	One primary only	No/Unknown	None/Unknown	No radiation and/or cancer-directed surgery	New Mexico - 1973+
Married (including common law)	79	2009	White	C50.1-Central portion of breast	Moderately differentiated; Grade II	Right - origin of primary	Positive histology	I	T1c	N0	M0	Regional	51	Surgery performed	18	200	0	0	10	10	0	0	0	0	3	3	0	9	0	Positive	Positive	Not 2010+ Breast	Not 2010+ Breast		Alive or dead of other cause	Alive or dead due to cancer	68	Alive	One primary only	No/Unknown	None/Unknown	No radiation and/or cancer-directed surgery	Seattle (Puget Sound) - 1974+
Unknown	77	2006	White	C50.9-Breast, NOS	Moderately differentiated; Grade II	Left - origin of primary	Positive histology	IIA	T1c	N1a	M0	Regional	22	Surgery performed	14	100	600	0	10	10	1	987	987	0	3	3	0	10	1	Positive	Positive	Not 2010+ Breast	Not 2010+ Breast		N/A not first tumor	N/A not first tumor	36	Dead	2nd of 2 or more primaries	No/Unknown	None/Unknown	No radiation and/or cancer-directed surgery	Atlanta (Metropolitan) - 1975+
Married (including common law)	79	2009	White	C50.1-Central portion of breast	Moderately differentiated; Grade II	Right - origin of primary	Positive histology	IIA	T2	N0(i-)	M0	Localized	51	Surgery performed	30	100	0	0	10	10	0	1	1	0	3	3	0	16	0	Positive	Positive	Not 2010+ Breast	Not 2010+ Breast		Alive or dead of other cause	Alive or dead due to cancer	67	Alive	1st of 2 or more primaries	No/Unknown	None/Unknown	No radiation and/or cancer-directed surgery	Connecticut - 1973+
Married (including common law)	76	2006	White	C50.1-Central portion of breast	Moderately differentiated; Grade II	Left - origin of primary	Positive histology	I	T1a	N0(i+)	M0	Localized	51	Surgery performed	5	100	50	0	10	10	0	987	987	20	3	3	0	14	0	Positive	Positive	Not 2010+ Breast	Not 2010+ Breast		N/A not first tumor	N/A not first tumor	103	Alive	3rd of 3 or more primaries	No/Unknown	None/Unknown	No radiation and/or cancer-directed surgery	Hawaii - 1973+
Married (including common law)	78	2008	White	C50.1-Central portion of breast	Moderately differentiated; Grade II	Right - origin of primary	Positive histology	IIA	T1c	N1a	M0	Regional	41	Surgery performed	14	100	250	0	10	10	3	987	987	50	3	3	0	13	3	Positive	Positive	Not 2010+ Breast	Not 2010+ Breast		Dead (attributable to this cancer dx)	Alive or dead due to cancer	33	Dead	One primary only	Yes	None/Unknown	No radiation and/or cancer-directed surgery	Kentucky - 2000+
Married (including common law)	81	2010	Other (American Indian/AK Native, Asian/Pacific Islander)	C50.1-Central portion of breast	Moderately differentiated; Grade II	Right - origin of primary	Positive histology	IIB	T2	N1a	M0	Regional	41	Surgery performed	35	100	250	0	10	10	2	987	987	20	3	3	0	10	2	Positive	Positive	Negative	Her2-/HR+		Alive or dead of other cause	Alive or dead due to cancer	53	Alive	One primary only	Yes	None/Unknown	No radiation and/or cancer-directed surgery	New Jersey - 2000+
Married (including common law)	83	2012	White	C50.9-Breast, NOS	Moderately differentiated; Grade II	Right - origin of primary	Positive histology	IV	TX	N0	M1	Distant	0	Not recommended	999	100	0	40	10	10	98	0	0	0	1	0	0	0	98	Positive	Positive	Negative	Her2-/HR+		Dead (attributable to this cancer dx)	Alive or dead due to cancer	9	Dead	One primary only	No/Unknown	None/Unknown	No radiation and/or cancer-directed surgery	New Jersey - 2000+
Married (including common law)	74	2004	White	C50.4-Upper-outer quadrant of breast	Moderately differentiated; Grade II	Left - origin of primary	Positive histology	I	T1c	N0	M0	Localized	51	Surgery performed	14	100	0	0	10	10	0	0	0	0	3	3	0	10	0	Positive	Positive	Not 2010+ Breast	Not 2010+ Breast		N/A not first tumor	N/A not first tumor	32	Dead	2nd of 2 or more primaries	No/Unknown	None/Unknown	No radiation and/or cancer-directed surgery	Louisiana - 2000+
Divorced	74	2004	White	C50.8-Overlapping lesion of breast	Poorly differentiated; Grade III	Right - origin of primary	Positive histology	IIIA	T2	N2NOS	M0	Regional	51	Surgery performed	30	100	620	0	10	20	4	987	987	0	3	3	0	10	4	Positive	Negative	Not 2010+ Breast	Not 2010+ Breast		N/A not first tumor	N/A not first tumor	85	Dead	2nd of 2 or more primaries	Yes	Beam radiation	Radiation after surgery	New Jersey - 2000+
Married (including common law)	78	2007	White	C50.1-Central portion of breast	Moderately differentiated; Grade II	Left - origin of primary	Positive histology	IIA	T2	N0	M0	Localized	51	Surgery performed	25	100	0	0	10	10	0	0	0	0	3	3	0	14	0	Positive	Positive	Not 2010+ Breast	Not 2010+ Breast		Alive or dead of other cause	Alive or dead due to cancer	3	Alive	One primary only	No/Unknown	None/Unknown	No radiation and/or cancer-directed surgery	Los Angeles - 1992+
Married (including common law)	82	2012	Black	C50.1-Central portion of breast	Well differentiated; Grade I	Right - origin of primary	Positive histology	IIA	T1c	N1mi	M0	Regional	41	Surgery performed	16	100	150	0	10	10	1	987	987	20	3	3	0	1	1	Positive	Positive	Negative	Her2-/HR+		N/A not first tumor	N/A not first tumor	31	Alive	2nd of 2 or more primaries	No/Unknown	None/Unknown	No radiation and/or cancer-directed surgery	Louisiana - 2000+
Married (including common law)	80	2010	White	C50.9-Breast, NOS	Moderately differentiated; Grade II	Left - origin of primary	Positive histology	IIA	T2	N0	M0	Localized	41	Surgery performed	25	100	0	0	10	10	0	0	0	0	3	3	0	2	0	Positive	Positive	Negative	Her2-/HR+		N/A not first tumor	N/A not first tumor	54	Alive	2nd of 2 or more primaries	No/Unknown	None/Unknown	No radiation and/or cancer-directed surgery	Kentucky - 2000+
Widowed	77	2007	White	C50.1-Central portion of breast	Poorly differentiated; Grade III	Left - origin of primary	Positive histology	IIA	T2	N0	M0	Localized	41	Surgery performed	30	100	0	0	10	10	0	0	0	20	3	3	0	4	0	Positive	Positive	Not 2010+ Breast	Not 2010+ Breast		Alive or dead of other cause	Dead (attributable to causes other than this cancer dx)	82	Dead	1st of 2 or more primaries	No/Unknown	None/Unknown	No radiation and/or cancer-directed surgery	California excluding SF/SJM/LA - 2000+
Married (including common law)	77	2007	White	C50.9-Breast, NOS	Moderately differentiated; Grade II	Right - origin of primary	Positive histology	IV	T2	N1mi	M1	Distant	40	Surgery performed	28	100	130	44	10	10	1	987	987	20	3	3	0	2	1	Positive	Positive	Not 2010+ Breast	Not 2010+ Breast		N/A not first tumor	N/A not first tumor	32	Dead	2nd of 2 or more primaries	No/Unknown	None/Unknown	No radiation and/or cancer-directed surgery	Connecticut - 1973+
Married (including common law)	75	2004	White	C50.2-Upper-inner quadrant of breast	Moderately differentiated; Grade II	Left - origin of primary	Positive histology	I	T1c	N0	M0	Localized	51	Surgery performed	19	100	0	0	10	10	0	0	0	30	3	3	0	11	0	Positive	Positive	Not 2010+ Breast	Not 2010+ Breast		N/A not first tumor	N/A not first tumor	85	Dead	2nd of 2 or more primaries	No/Unknown	None/Unknown	No radiation and/or cancer-directed surgery	San Francisco-Oakland SMSA - 1973+
Married (including common law)	75	2005	White	C50.9-Breast, NOS	Undifferentiated; anaplastic; Grade IV	Right - origin of primary	Positive histology	IIB	T2	N1a	M0	Regional	51	Surgery performed	35	100	260	0	999	999	2	987	987	0	3	3	0	17	2	Unknown	Unknown	Not 2010+ Breast	Not 2010+ Breast		Alive or dead of other cause	Dead (attributable to causes other than this cancer dx)	19	Dead	One primary only	No/Unknown	None/Unknown	No radiation and/or cancer-directed surgery	Detroit (Metropolitan) - 1973+
Widowed	77	2006	Other (American Indian/AK Native, Asian/Pacific Islander)	C50.8-Overlapping lesion of breast	Poorly differentiated; Grade III	Left - origin of primary	Positive histology	IIIA	T2	N2a	M0	Regional	51	Surgery performed	30	200	250	0	10	10	6	987	987	0	Blank(s)	Blank(s)	Blank(s)	12	6	Positive	Positive	Not 2010+ Breast	Not 2010+ Breast		Alive or dead of other cause	Alive or dead due to cancer	98	Alive	One primary only	No/Unknown	None/Unknown	No radiation and/or cancer-directed surgery	Seattle (Puget Sound) - 1974+
Married (including common law)	78	2007	Black	C50.4-Upper-outer quadrant of breast	Moderately differentiated; Grade II	Right - origin of primary	Positive histology	IIIB	T4a	N1a	M0	Regional	41	Surgery performed	17	400	600	0	10	10	1	987	987	0	3	3	0	12	1	Positive	Positive	Not 2010+ Breast	Not 2010+ Breast		Alive or dead of other cause	Alive or dead due to cancer	90	Alive	1st of 2 or more primaries	Yes	None/Unknown	No radiation and/or cancer-directed surgery	Greater Georgia - 2000+
Married (including common law)	82	2011	White	C50.1-Central portion of breast	Well differentiated; Grade I	Right - origin of primary	Positive histology	I	T1a	N0(i-)	M0	Localized	41	Surgery performed	3	100	0	0	997	997	0	1	0	20	3	3	0	1	0	Unknown	Unknown	Unknown	Unknown		N/A not first tumor	N/A not first tumor	41	Alive	2nd of 2 or more primaries	No/Unknown	None/Unknown	No radiation and/or cancer-directed surgery	California excluding SF/SJM/LA - 2000+
Married (including common law)	79	2008	White	C50.6-Axillary tail of breast	Moderately differentiated; Grade II	Right - origin of primary	Positive histology	I	T1c	N0	M0	Localized	41	Surgery performed	15	100	0	0	10	10	0	0	0	30	3	3	0	2	0	Positive	Positive	Not 2010+ Breast	Not 2010+ Breast		Alive or dead of other cause	Dead (attributable to causes other than this cancer dx)	5	Dead	One primary only	No/Unknown	None/Unknown	No radiation and/or cancer-directed surgery	Kentucky - 2000+
Married (including common law)	81	2010	White	C50.1-Central portion of breast	Moderately differentiated; Grade II	Left - origin of primary	Positive histology	IIB	T2	N1a	M0	Regional	24	Surgery performed	26	100	250	0	10	10	1	987	987	20	0	3	0	5	1	Positive	Positive	Negative	Her2-/HR+		N/A not first tumor	N/A not first tumor	50	Alive	2nd of 2 or more primaries	No/Unknown	None/Unknown	No radiation and/or cancer-directed surgery	California excluding SF/SJM/LA - 2000+
Married (including common law)	83	2012	White	C50.1-Central portion of breast	Moderately differentiated; Grade II	Right - origin of primary	Positive histology	I	T1b	N0(i-)	M0	Localized	40	Surgery performed	10	100	0	0	10	10	0	1	0	20	3	3	0	1	0	Positive	Positive	Negative	Her2-/HR+		Alive or dead of other cause	Dead (attributable to causes other than this cancer dx)	14	Dead	One primary only	No/Unknown	None/Unknown	No radiation and/or cancer-directed surgery	New Jersey - 2000+
Married (including common law)	84	2013	White	C50.1-Central portion of breast	Well differentiated; Grade I	Right - origin of primary	Positive histology	IIB	T2	N1	M0	Regional	41	Surgery performed	30	100	260	0	20	20	1	987	987	20	3	1	0	2	1	Negative	Negative	Positive	Her2+/HR-		Dead (attributable to this cancer dx)	Alive or dead due to cancer	12	Dead	One primary only	No/Unknown	None/Unknown	No radiation and/or cancer-directed surgery	California excluding SF/SJM/LA - 2000+
Married (including common law)	78	2008	White	C50.1-Central portion of breast	Moderately differentiated; Grade II	Right - origin of primary	Positive histology	IIB	T2	N1a	M0	Regional	51	Surgery performed	995	100	250	0	10	10	3	987	987	0	3	3	0	12	3	Positive	Positive	Not 2010+ Breast	Not 2010+ Breast		N/A not first tumor	N/A not first tumor	2	Dead	3rd of 3 or more primaries	No/Unknown	None/Unknown	No radiation and/or cancer-directed surgery	New Jersey - 2000+
Widowed	83	2012	White	C50.9-Breast, NOS	Poorly differentiated; Grade III	Right - origin of primary	Positive histology	IIIB	T4b	N2a	M0	Regional	51	Surgery performed	135	512	600	0	10	10	6	987	987	20	3	3	0	6	6	Positive	Positive	Negative	Her2-/HR+		Alive or dead of other cause	Dead (attributable to causes other than this cancer dx)	9	Dead	One primary only	No/Unknown	None/Unknown	No radiation and/or cancer-directed surgery	Iowa - 1973+
Married (including common law)	75	2004	White	C50.9-Breast, NOS	Moderately differentiated; Grade II	Left - origin of primary	Positive histology	IIIA	T1c	N2a	M0	Regional	51	Surgery performed	18	100	250	0	10	10	4	987	987	0	3	3	0	10	4	Positive	Positive	Not 2010+ Breast	Not 2010+ Breast		Alive or dead of other cause	Alive or dead due to cancer	124	Alive	1st of 2 or more primaries	Yes	Beam radiation	Radiation after surgery	Connecticut - 1973+
Married (including common law)	77	2006	White	C50.9-Breast, NOS	Moderately differentiated; Grade II	Left - origin of primary	Positive histology	I	T1c	N0	M0	Localized	41	Surgery performed	14	100	0	0	10	10	0	0	0	0	3	3	0	7	0	Positive	Positive	Not 2010+ Breast	Not 2010+ Breast		Alive or dead of other cause	Alive or dead due to cancer	99	Alive	One primary only	No/Unknown	None/Unknown	No radiation and/or cancer-directed surgery	Connecticut - 1973+
Married (including common law)	79	2009	White	C50.9-Breast, NOS	Poorly differentiated; Grade III	Left - origin of primary	Positive histology	IIIA	T1c	N2a	M0	Regional	51	Surgery performed	17	100	250	0	10	10	7	987	987	20	3	3	0	13	7	Positive	Positive	Not 2010+ Breast	Not 2010+ Breast		Alive or dead of other cause	Alive or dead due to cancer	63	Alive	1st of 2 or more primaries	No/Unknown	Beam radiation	Radiation after surgery	California excluding SF/SJM/LA - 2000+
Married (including common law)	77	2007	White	C50.1-Central portion of breast	Moderately differentiated; Grade II	Right - origin of primary	Positive histology	IIA	T2	N0	M0	Regional	51	Surgery performed	38	200	0	0	10	20	0	0	0	0	3	3	0	15	0	Positive	Negative	Not 2010+ Breast	Not 2010+ Breast		N/A not first tumor	N/A not first tumor	83	Dead	2nd of 2 or more primaries	No/Unknown	Beam radiation	Radiation after surgery	Kentucky - 2000+
Married (including common law)	82	2011	White	C50.9-Breast, NOS	Moderately differentiated; Grade II	Right - origin of primary	Positive histology	IIB	T2	N1a	M0	Regional	50	Surgery performed	42	100	600	0	10	10	2	987	987	20	3	3	0	9	2	Positive	Positive	Negative	Her2-/HR+		Alive or dead of other cause	Alive or dead due to cancer	39	Alive	One primary only	No/Unknown	None/Unknown	No radiation and/or cancer-directed surgery	California excluding SF/SJM/LA - 2000+
Married (including common law)	82	2011	White	C50.4-Upper-outer quadrant of breast	Well differentiated; Grade I	Left - origin of primary	Positive histology	IIA	T1b	N1a	M0	Regional	42	Surgery performed	9	100	600	0	10	10	1	987	987	20	3	3	0	3	1	Positive	Positive	Negative	Her2-/HR+		Alive or dead of other cause	Alive or dead due to cancer	39	Alive	1st of 2 or more primaries	No/Unknown	None/Unknown	No radiation and/or cancer-directed surgery	California excluding SF/SJM/LA - 2000+
Married (including common law)	78	2007	White	C50.9-Breast, NOS	Moderately differentiated; Grade II	Right - origin of primary	Positive histology	UNK Stage	TX	NX	MX	Unknown/unstaged	0	Not recommended	999	999	999	99	10	10	98	987	987	0	9	9	9	0	98	Positive	Positive	Not 2010+ Breast	Not 2010+ Breast		Alive or dead of other cause	Dead (attributable to causes other than this cancer dx)	4	Dead	One primary only	No/Unknown	None/Unknown	No radiation and/or cancer-directed surgery	California excluding SF/SJM/LA - 2000+
Married (including common law)	79	2008	White	C50.9-Breast, NOS	Poorly differentiated; Grade III	Right - origin of primary	Positive histology	IIIA	T1c	N2a	M0	Regional	51	Surgery performed	20	200	260	0	10	10	5	987	987	0	3	3	0	12	5	Positive	Positive	Not 2010+ Breast	Not 2010+ Breast		Alive or dead of other cause	Dead (attributable to causes other than this cancer dx)	19	Dead	One primary only	No/Unknown	None/Unknown	No radiation and/or cancer-directed surgery	New Jersey - 2000+
Married (including common law)	78	2007	White	C50.0-Nipple	Moderately differentiated; Grade II	Right - origin of primary	Positive histology	IIA	T1c	N1a	M0	Regional	51	Surgery performed	15	100	250	0	10	10	2	987	987	0	3	3	0	12	2	Positive	Positive	Not 2010+ Breast	Not 2010+ Breast		N/A not first tumor	N/A not first tumor	48	Dead	2nd of 2 or more primaries	No/Unknown	None/Unknown	No radiation and/or cancer-directed surgery	Iowa - 1973+
Married (including common law)	81	2011	White	C50.8-Overlapping lesion of breast	Poorly differentiated; Grade III	Right - origin of primary	Positive histology	I	T1c	N0	M0	Localized	41	Surgery performed	11	100	0	0	10	10	0	0	0	0	3	3	0	1	0	Positive	Positive	Negative	Her2-/HR+		N/A not first tumor	N/A not first tumor	38	Alive	2nd of 2 or more primaries	No/Unknown	None/Unknown	No radiation and/or cancer-directed surgery	Connecticut - 1973+
Married (including common law)	75	2004	White	C50.1-Central portion of breast	Moderately differentiated; Grade II	Right - origin of primary	Positive histology	IV	T2	N1a	M1	Distant	51	Surgery performed	34	100	250	44	10	10	2	987	987	0	3	3	0	18	2	Positive	Positive	Not 2010+ Breast	Not 2010+ Breast		Dead (attributable to this cancer dx)	Alive or dead due to cancer	37	Dead	One primary only	Yes	None/Unknown	No radiation and/or cancer-directed surgery	Detroit (Metropolitan) - 1973+
Widowed	84	2013	White	C50.1-Central portion of breast	Moderately differentiated; Grade II	Right - origin of primary	Positive histology	IIA	T2	N0	M0	Localized	51	Surgery performed	32	100	0	0	10	10	0	0	0	0	3	3	0	7	0	Positive	Positive	Negative	Her2-/HR+		N/A not first tumor	N/A not first tumor	14	Alive	2nd of 2 or more primaries	No/Unknown	None/Unknown	No radiation and/or cancer-directed surgery	New Mexico - 1973+
Divorced	75	2004	White	C50.4-Upper-outer quadrant of breast	Moderately differentiated; Grade II	Left - origin of primary	Positive histology	I	T1b	N0	M0	Localized	51	Surgery performed	10	100	0	0	10	10	0	0	0	20	3	3	0	22	0	Positive	Positive	Not 2010+ Breast	Not 2010+ Breast		Alive or dead of other cause	Dead (attributable to causes other than this cancer dx)	17	Dead	One primary only	No/Unknown	None/Unknown	No radiation and/or cancer-directed surgery	Connecticut - 1973+
Single (never married)	76	2006	White	C50.9-Breast, NOS	Poorly differentiated; Grade III	Left - origin of primary	Positive histology	IIA	T1c	N1a	M0	Regional	41	Surgery performed	15	100	250	0	10	10	1	987	987	0	3	3	0	2	1	Positive	Positive	Not 2010+ Breast	Not 2010+ Breast		Alive or dead of other cause	Alive or dead due to cancer	97	Alive	One primary only	No/Unknown	None/Unknown	No radiation and/or cancer-directed surgery	San Francisco-Oakland SMSA - 1973+
Widowed	84	2013	White	C50.1-Central portion of breast	Moderately differentiated; Grade II	Right - origin of primary	Positive histology	IIA	T2	N0	M0	Regional	22	Surgery performed	25	200	0	0	10	10	98	0	0	0	3	0	0	0	98	Positive	Positive	Negative	Her2-/HR+		N/A not first tumor	N/A not first tumor	13	Alive	2nd of 2 or more primaries	No/Unknown	Beam radiation	Radiation after surgery	Detroit (Metropolitan) - 1973+
Widowed	80	2009	White	C50.4-Upper-outer quadrant of breast	Moderately differentiated; Grade II	Left - origin of primary	Positive histology	IIA	T1b	N1a	M0	Regional	51	Surgery performed	10	100	250	0	10	10	2	987	987	0	3	3	0	15	2	Positive	Positive	Not 2010+ Breast	Not 2010+ Breast		N/A not first tumor	N/A not first tumor	61	Alive	2nd of 2 or more primaries	No/Unknown	Beam radiation	Radiation after surgery	California excluding SF/SJM/LA - 2000+
Widowed	77	2006	White	C50.9-Breast, NOS	Moderately differentiated; Grade II	Right - origin of primary	Positive histology	IIIC	T2	N3NOS	M0	Regional	50	Surgery performed	31	200	820	0	10	10	16	987	987	20	3	3	0	16	16	Positive	Positive	Not 2010+ Breast	Not 2010+ Breast		Alive or dead of other cause	Dead (attributable to causes other than this cancer dx)	55	Dead	1st of 2 or more primaries	Yes	Beam radiation	Radiation after surgery	New Jersey - 2000+
Unknown	78	2007	White	C50.9-Breast, NOS	Moderately differentiated; Grade II	Right - origin of primary	Positive histology	UNK Stage	TX	NX	MX	Localized	0	Not recommended	999	100	999	99	10	10	98	987	987	0	0	0	9	0	98	Positive	Positive	Not 2010+ Breast	Not 2010+ Breast		Alive or dead of other cause	Alive or dead due to cancer	85	Alive	One primary only	No/Unknown	None/Unknown	No radiation and/or cancer-directed surgery	Los Angeles - 1992+
Widowed	79	2009	White	C50.0-Nipple	Well differentiated; Grade I	Right - origin of primary	Positive histology	IV	T4b	N0	M1	Distant	0	Not recommended	70	512	0	44	10	10	98	0	0	987	0	0	0	0	98	Positive	Positive	Not 2010+ Breast	Not 2010+ Breast		Alive or dead of other cause	Dead (attributable to causes other than this cancer dx)	1	Dead	One primary only	Yes	None/Unknown	No radiation and/or cancer-directed surgery	Kentucky - 2000+
Unknown	79	2008	White	C50.2-Upper-inner quadrant of breast	Moderately differentiated; Grade II	Right - origin of primary	Positive exfoliative cytology, no positive histology	I	T1c	N0	M0	Localized	41	Surgery performed	13	100	0	0	20	20	0	0	0	0	3	1	0	1	0	Negative	Negative	Not 2010+ Breast	Not 2010+ Breast		Alive or dead of other cause	Dead (attributable to causes other than this cancer dx)	19	Dead	One primary only	No/Unknown	None/Unknown	No radiation and/or cancer-directed surgery	Kentucky - 2000+
Married (including common law)	77	2006	White	C50.1-Central portion of breast	Moderately differentiated; Grade II	Left - origin of primary	Positive histology	I	T1c	N0(i-)	M0	Localized	41	Surgery performed	12	100	0	0	10	20	0	1	0	0	3	3	0	17	0	Positive	Negative	Not 2010+ Breast	Not 2010+ Breast		Alive or dead of other cause	Alive or dead due to cancer	96	Alive	One primary only	No/Unknown	None/Unknown	No radiation and/or cancer-directed surgery	New Jersey - 2000+
Married (including common law)	77	2006	Black	C50.4-Upper-outer quadrant of breast	Well differentiated; Grade I	Right - origin of primary	Positive histology	IIB	T2	N1a	M0	Regional	51	Surgery performed	32	100	260	0	10	20	1	987	987	30	3	3	0	13	1	Positive	Negative	Not 2010+ Breast	Not 2010+ Breast		Alive or dead of other cause	Alive or dead due to cancer	1	Alive	One primary only	No/Unknown	None/Unknown	No radiation and/or cancer-directed surgery	Los Angeles - 1992+
Married (including common law)	81	2010	White	C50.4-Upper-outer quadrant of breast	Poorly differentiated; Grade III	Left - origin of primary	Positive histology	IIA	T2	N0	M0	Localized	51	Surgery performed	22	100	0	0	10	10	0	0	0	20	3	3	0	6	0	Positive	Positive	Negative	Her2-/HR+		Alive or dead of other cause	Alive or dead due to cancer	46	Alive	One primary only	No/Unknown	None/Unknown	No radiation and/or cancer-directed surgery	Los Angeles - 1992+
Married (including common law)	75	2004	White	C50.0-Nipple	Moderately differentiated; Grade II	Left - origin of primary	Positive histology	IIIB	T4b	N2a	M0	Regional	51	Surgery performed	32	510	500	0	10	10	7	987	987	50	3	3	0	23	7	Positive	Positive	Not 2010+ Breast	Not 2010+ Breast		N/A not first tumor	N/A not first tumor	58	Dead	5th of 5 or more primaries	No/Unknown	Beam radiation	Radiation after surgery	Connecticut - 1973+
Married (including common law)	81	2012	White	C50.9-Breast, NOS	Poorly differentiated; Grade III	Left - origin of primary	Positive histology	IIIB	T4b	N1a	M0	Regional	41	Surgery performed	23	512	250	0	10	20	2	987	987	20	3	3	0	9	2	Positive	Negative	Unknown	Unknown		Alive or dead of other cause	Alive or dead due to cancer	35	Alive	1st of 2 or more primaries	No/Unknown	Beam radiation	Radiation after surgery	San Francisco-Oakland SMSA - 1973+
Married (including common law)	82	2013	White	C50.0-Nipple	Moderately differentiated; Grade II	Right - origin of primary	Positive microscopic confirm, method not specified	IIB	T2	N1a	M0	Regional	51	Surgery performed	25	100	260	0	10	10	1	987	987	0	3	3	0	14	1	Positive	Positive	Borderline	Unknown		Alive or dead of other cause	Dead (attributable to causes other than this cancer dx)	14	Dead	One primary only	No/Unknown	None/Unknown	No radiation and/or cancer-directed surgery	Los Angeles - 1992+
Separated	76	2007	Black	C50.1-Central portion of breast	Poorly differentiated; Grade III	Left - origin of primary	Positive histology	I	T1c	N0(i-)	M0	Regional	22	Surgery performed	15	200	0	0	10	10	0	1	0	30	3	3	0	1	0	Positive	Positive	Not 2010+ Breast	Not 2010+ Breast		Alive or dead of other cause	Dead (attributable to causes other than this cancer dx)	90	Dead	1st of 2 or more primaries	No/Unknown	Beam radiation	Radiation after surgery	Los Angeles - 1992+
Married (including common law)	81	2012	White	C50.1-Central portion of breast	Moderately differentiated; Grade II	Right - origin of primary	Positive histology	IIIA	T2	N2a	M0	Regional	51	Surgery performed	28	100	250	0	10	10	7	987	987	20	3	3	0	9	7	Positive	Positive	Negative	Her2-/HR+		Alive or dead of other cause	Alive or dead due to cancer	34	Alive	One primary only	Yes	None/Unknown	No radiation and/or cancer-directed surgery	Kentucky - 2000+
Married (including common law)	77	2008	White	C50.1-Central portion of breast	Moderately differentiated; Grade II	Left - origin of primary	Positive histology	IIB	T2	N1a	M0	Regional	51	Surgery performed	47	200	260	0	10	10	1	987	987	0	3	3	0	3	1	Positive	Positive	Not 2010+ Breast	Not 2010+ Breast		Alive or dead of other cause	Dead (attributable to causes other than this cancer dx)	33	Dead	1st of 2 or more primaries	No/Unknown	None/Unknown	No radiation and/or cancer-directed surgery	California excluding SF/SJM/LA - 2000+
Married (including common law)	75	2005	White	C50.9-Breast, NOS	Moderately differentiated; Grade II	Right - origin of primary	Positive histology	IIIB	T4b	N2NOS	M0	Regional	51	Surgery performed	25	510	620	0	10	10	7	987	987	20	3	3	0	14	7	Positive	Positive	Not 2010+ Breast	Not 2010+ Breast		N/A not first tumor	N/A not first tumor	10	Dead	2nd of 2 or more primaries	Yes	Beam radiation	Radiation after surgery	Louisiana - 2000+
Married (including common law)	76	2007	White	C50.1-Central portion of breast	Moderately differentiated; Grade II	Right - origin of primary	Positive histology	I	T1mic	N0	M0	Localized	41	Surgery performed	990	100	0	0	10	10	98	0	0	20	3	0	0	0	98	Positive	Positive	Not 2010+ Breast	Not 2010+ Breast		Dead (attributable to this cancer dx)	Alive or dead due to cancer	23	Dead	One primary only	No/Unknown	None/Unknown	No radiation and/or cancer-directed surgery	Los Angeles - 1992+
Married (including common law)	74	2005	White	C50.1-Central portion of breast	Poorly differentiated; Grade III	Left - origin of primary	Positive histology	IIA	T2	N0(i-)	M0	Localized	51	Surgery performed	26	100	0	0	10	20	0	1	1	0	3	3	0	14	0	Positive	Negative	Not 2010+ Breast	Not 2010+ Breast		Alive or dead of other cause	Alive or dead due to cancer	118	Alive	One primary only	No/Unknown	Beam radiation	Radiation after surgery	New Jersey - 2000+
Married (including common law)	77	2008	White	C50.0-Nipple	Poorly differentiated; Grade III	Left - origin of primary	Positive histology	IIB	T2	N1a	M0	Regional	50	Surgery performed	33	200	250	0	10	10	2	987	987	0	3	3	0	4	2	Positive	Positive	Not 2010+ Breast	Not 2010+ Breast		Dead (attributable to this cancer dx)	Alive or dead due to cancer	3	Dead	One primary only	Yes	None/Unknown	No radiation and/or cancer-directed surgery	Greater Georgia - 2000+
Married (including common law)	77	2008	White	C50.9-Breast, NOS	Poorly differentiated; Grade III	Left - origin of primary	Positive histology	IIB	T2	N1a	M0	Regional	51	Surgery performed	30	100	250	0	10	10	2	987	987	0	3	3	0	34	2	Positive	Positive	Not 2010+ Breast	Not 2010+ Breast		Alive or dead of other cause	Dead (attributable to causes other than this cancer dx)	15	Dead	One primary only	No/Unknown	None/Unknown	No radiation and/or cancer-directed surgery	Greater Georgia - 2000+
Single (never married)	79	2010	White	C50.1-Central portion of breast	Moderately differentiated; Grade II	Left - origin of primary	Positive histology	IV	T4b	N3a	M1	Distant	61	Surgery performed	30	512	750	44	10	10	14	987	987	30	3	3	1	16	14	Positive	Positive	Negative	Her2-/HR+		Alive or dead of other cause	Dead (attributable to causes other than this cancer dx)	36	Dead	1st of 2 or more primaries	Yes	Beam radiation	Radiation after surgery	Connecticut - 1973+
Married (including common law)	79	2010	White	C50.1-Central portion of breast	Poorly differentiated; Grade III	Right - origin of primary	Positive histology	IIB	T2	N1a	M0	Regional	51	Surgery performed	30	200	250	0	10	10	2	987	987	0	3	3	0	19	2	Positive	Positive	Positive	Her2+/HR+		Alive or dead of other cause	Dead (attributable to causes other than this cancer dx)	18	Dead	1st of 2 or more primaries	No/Unknown	None/Unknown	No radiation and/or cancer-directed surgery	New Mexico - 1973+
Married (including common law)	73	2004	Other (American Indian/AK Native, Asian/Pacific Islander)	C50.1-Central portion of breast	Moderately differentiated; Grade II	Left - origin of primary	Positive histology	IIA	T1c	N1a	M0	Regional	51	Surgery performed	15	100	250	0	10	10	2	987	987	0	3	3	0	12	2	Positive	Positive	Not 2010+ Breast	Not 2010+ Breast		Alive or dead of other cause	Dead (attributable to causes other than this cancer dx)	107	Dead	1st of 2 or more primaries	Yes	None/Unknown	No radiation and/or cancer-directed surgery	Hawaii - 1973+
Married (including common law)	77	2008	White	C50.1-Central portion of breast	Moderately differentiated; Grade II	Right - origin of primary	Positive histology	IIA	T2	N0	M0	Regional	22	Surgery performed	23	200	0	0	10	10	0	0	0	0	3	3	0	2	0	Positive	Positive	Not 2010+ Breast	Not 2010+ Breast		Dead (attributable to this cancer dx)	Alive or dead due to cancer	43	Dead	One primary only	No/Unknown	None/Unknown	No radiation and/or cancer-directed surgery	Detroit (Metropolitan) - 1973+
Married (including common law)	74	2005	White	C50.1-Central portion of breast	Moderately differentiated; Grade II	Left - origin of primary	Positive histology	IIIA	T1c	N2a	M0	Regional	51	Surgery performed	20	100	250	0	10	10	5	987	987	0	3	3	0	15	5	Positive	Positive	Not 2010+ Breast	Not 2010+ Breast		Alive or dead of other cause	Dead (attributable to causes other than this cancer dx)	81	Dead	1st of 2 or more primaries	Yes	None/Unknown	No radiation and/or cancer-directed surgery	California excluding SF/SJM/LA - 2000+
Widowed	82	2013	White	C50.9-Breast, NOS	Poorly differentiated; Grade III	Right - origin of primary	Positive histology	IIA	T2	N0	M0	Regional	40	Surgery performed	35	200	0	0	10	10	0	0	0	0	3	3	0	1	0	Positive	Positive	Negative	Her2-/HR+		Alive or dead of other cause	Alive or dead due to cancer	19	Alive	One primary only	No/Unknown	None/Unknown	No radiation and/or cancer-directed surgery	California excluding SF/SJM/LA - 2000+
Married (including common law)	80	2011	White	C50.0-Nipple	Moderately differentiated; Grade II	Left - origin of primary	Positive histology	I	T1c	N0(i-)	M0	Localized	51	Surgery performed	20	100	0	0	10	10	0	1	0	0	3	3	0	5	0	Positive	Positive	Borderline	Unknown		N/A not first tumor	N/A not first tumor	20	Dead	2nd of 2 or more primaries	No/Unknown	None/Unknown	No radiation and/or cancer-directed surgery	California excluding SF/SJM/LA - 2000+
Married (including common law)	83	2013	White	C50.1-Central portion of breast	Moderately differentiated; Grade II	Left - origin of primary	Positive histology	IIA	T2	N0	M0	Localized	52	Surgery performed	21	100	0	0	10	10	98	0	0	20	3	0	0	0	98	Positive	Positive	Negative	Her2-/HR+		N/A not first tumor	N/A not first tumor	21	Alive	2nd of 2 or more primaries	No/Unknown	None/Unknown	No radiation and/or cancer-directed surgery	California excluding SF/SJM/LA - 2000+
Married (including common law)	80	2010	White	C50.1-Central portion of breast	Moderately differentiated; Grade II	Left - origin of primary	Positive histology	I	T1c	N0	M0	Localized	51	Surgery performed	18	100	0	0	10	10	0	0	0	0	3	3	0	23	0	Positive	Positive	Positive	Her2+/HR+		Alive or dead of other cause	Alive or dead due to cancer	58	Alive	One primary only	No/Unknown	None/Unknown	No radiation and/or cancer-directed surgery	Los Angeles - 1992+
Single (never married)	74	2005	Black	C50.1-Central portion of breast	Moderately differentiated; Grade II	Right - origin of primary	Positive histology	IV	T4b	N0	M1	Distant	0	Not recommended	80	510	0	40	10	10	98	0	0	0	1	0	0	0	98	Positive	Positive	Not 2010+ Breast	Not 2010+ Breast		Dead (attributable to this cancer dx)	Alive or dead due to cancer	21	Dead	One primary only	No/Unknown	Beam radiation	No radiation and/or cancer-directed surgery	Los Angeles - 1992+
Married (including common law)	79	2009	Black	C50.6-Axillary tail of breast	Moderately differentiated; Grade II	Right - origin of primary	Positive histology	I	T1c	N0	M0	Regional	51	Surgery performed	15	200	0	0	10	10	0	0	0	0	3	3	0	13	0	Positive	Positive	Not 2010+ Breast	Not 2010+ Breast		Alive or dead of other cause	Alive or dead due to cancer	68	Alive	One primary only	No/Unknown	None/Unknown	No radiation and/or cancer-directed surgery	Louisiana - 2000+
Married (including common law)	82	2013	White	C50.5-Lower-outer quadrant of breast	Moderately differentiated; Grade II	Left - origin of primary	Positive histology	IIB	T2	N1a	M0	Regional	61	Surgery performed	23	100	250	0	10	10	3	987	987	20	3	3	0	9	3	Positive	Positive	Negative	Her2-/HR+		Alive or dead of other cause	Alive or dead due to cancer	20	Alive	One primary only	Yes	Beam radiation	Radiation after surgery	San Jose-Monterey - 1992+
Single (never married)	77	2008	White	C50.9-Breast, NOS	Poorly differentiated; Grade III	Left - origin of primary	Positive histology	IV	T4c	N1	M1	Distant	0	Not recommended	200	620	600	40	10	10	98	987	987	0	3	0	0	0	98	Positive	Positive	Not 2010+ Breast	Not 2010+ Breast		Alive or dead of other cause	Dead (attributable to causes other than this cancer dx)	23	Dead	One primary only	Yes	None/Unknown	No radiation and/or cancer-directed surgery	Iowa - 1973+
Married (including common law)	83	2013	Black	C50.0-Nipple	Moderately differentiated; Grade II	Right - origin of primary	Positive histology	IIA	T2	N0	M0	Localized	51	Surgery performed	21	100	0	0	10	10	0	0	0	0	3	3	0	3	0	Positive	Positive	Negative	Her2-/HR+		Alive or dead of other cause	Alive or dead due to cancer	13	Alive	One primary only	No/Unknown	None/Unknown	No radiation and/or cancer-directed surgery	Greater Georgia - 2000+
Married (including common law)	76	2007	White	C50.9-Breast, NOS	Moderately differentiated; Grade II	Left - origin of primary	Positive histology	UNK Stage	T2	NX	MX	Localized	50	Surgery performed	25	100	999	99	10	20	98	987	987	0	3	0	0	0	98	Positive	Negative	Not 2010+ Breast	Not 2010+ Breast		N/A not first tumor	N/A not first tumor	67	Dead	2nd of 2 or more primaries	No/Unknown	None/Unknown	No radiation and/or cancer-directed surgery	New Jersey - 2000+
Married (including common law)	78	2009	White	C50.1-Central portion of breast	Moderately differentiated; Grade II	Right - origin of primary	Positive histology	IIA	T1c	N1a	M0	Regional	50	Surgery performed	14	100	250	0	10	10	3	987	987	0	3	3	0	18	3	Positive	Positive	Not 2010+ Breast	Not 2010+ Breast		N/A not first tumor	N/A not first tumor	67	Alive	2nd of 2 or more primaries	Yes	Beam radiation	Radiation after surgery	Louisiana - 2000+
Married (including common law)	76	2007	Other (American Indian/AK Native, Asian/Pacific Islander)	C50.8-Overlapping lesion of breast	Moderately differentiated; Grade II	Left - origin of primary	Positive histology	IIA	T2	N0	M0	Localized	51	Surgery performed	25	100	0	0	10	10	0	0	0	0	3	3	0	8	0	Positive	Positive	Not 2010+ Breast	Not 2010+ Breast		Alive or dead of other cause	Alive or dead due to cancer	3	Alive	One primary only	No/Unknown	None/Unknown	No radiation and/or cancer-directed surgery	New Jersey - 2000+
Widowed	82	2013	White	C50.1-Central portion of breast	Poorly differentiated; Grade III	Right - origin of primary	Positive histology	IIA	T2	N0(i-)	M0	Localized	41	Surgery performed	24	100	0	0	10	10	0	1	0	0	3	3	0	2	0	Positive	Positive	Negative	Her2-/HR+		Alive or dead of other cause	Alive or dead due to cancer	19	Alive	One primary only	No/Unknown	None/Unknown	No radiation and/or cancer-directed surgery	Atlanta (Metropolitan) - 1975+
Married (including common law)	77	2008	White	C50.1-Central portion of breast	Moderately differentiated; Grade II	Right - origin of primary	Positive histology	I	T1c	N0	M0	Localized	40	Surgery performed	20	100	0	0	10	10	0	0	0	0	3	3	0	1	0	Positive	Positive	Not 2010+ Breast	Not 2010+ Breast		N/A not first tumor	N/A not first tumor	30	Dead	2nd of 2 or more primaries	No/Unknown	None/Unknown	No radiation and/or cancer-directed surgery	San Jose-Monterey - 1992+
Married (including common law)	79	2010	White	C50.1-Central portion of breast	Well differentiated; Grade I	Left - origin of primary	Positive histology	I	T1c	N0	M0	Localized	42	Surgery performed	20	100	0	0	10	10	0	0	0	0	3	3	0	2	0	Positive	Positive	Negative	Her2-/HR+		N/A not first tumor	N/A not first tumor	55	Alive	2nd of 2 or more primaries	No/Unknown	None/Unknown	No radiation and/or cancer-directed surgery	Atlanta (Metropolitan) - 1975+
Single (never married)	76	2007	White	C50.9-Breast, NOS	Poorly differentiated; Grade III	Right - origin of primary	Positive histology	IV	T4b	NX	M1	Distant	0	Not recommended	19	520	999	50	20	20	98	987	987	987	0	0	3	0	98	Negative	Negative	Not 2010+ Breast	Not 2010+ Breast		Dead (attributable to this cancer dx)	Alive or dead due to cancer	6	Dead	One primary only	Yes	Beam radiation	No radiation and/or cancer-directed surgery	Atlanta (Metropolitan) - 1975+
Married (including common law)	74	2005	White	C50.4-Upper-outer quadrant of breast	Well differentiated; Grade I	Right - origin of primary	Positive histology	IIA	T2	N0	M0	Localized	22	Surgery performed	35	100	0	0	10	10	0	0	0	50	3	3	0	1	0	Positive	Positive	Not 2010+ Breast	Not 2010+ Breast		Alive or dead of other cause	Alive or dead due to cancer	114	Alive	One primary only	No/Unknown	Beam radiation	Radiation after surgery	Connecticut - 1973+
Married (including common law)	77	2007	Other (American Indian/AK Native, Asian/Pacific Islander)	C50.5-Lower-outer quadrant of breast	Unknown	Left - origin of primary	Positive histology	I	T1a	N0	M0	Localized	51	Surgery performed	2	100	0	0	10	10	98	0	0	20	3	3	0	2	0	Positive	Positive	Not 2010+ Breast	Not 2010+ Breast		Alive or dead of other cause	Dead (attributable to causes other than this cancer dx)	7	Dead	1st of 2 or more primaries	No/Unknown	None/Unknown	No radiation and/or cancer-directed surgery	Greater Georgia - 2000+
Married (including common law)	78	2009	White	C50.8-Overlapping lesion of breast	Poorly differentiated; Grade III	Left - origin of primary	Positive histology	IIB	T2	N1mi	M0	Regional	51	Surgery performed	25	100	130	0	10	10	2	987	987	0	3	3	0	15	2	Positive	Positive	Not 2010+ Breast	Not 2010+ Breast		Alive or dead of other cause	Alive or dead due to cancer	66	Alive	One primary only	No/Unknown	Beam radiation	Radiation after surgery	Greater Georgia - 2000+
Married (including common law)	77	2007	White	C50.0-Nipple	Moderately differentiated; Grade II	Right - origin of primary	Positive histology	I	T1c	N0	M0	Localized	51	Surgery performed	14	100	0	0	10	10	0	0	0	20	3	3	0	7	0	Positive	Positive	Not 2010+ Breast	Not 2010+ Breast		Alive or dead of other cause	Alive or dead due to cancer	90	Alive	One primary only	No/Unknown	Beam radiation	Radiation after surgery	Greater Georgia - 2000+
Married (including common law)	78	2009	White	C50.1-Central portion of breast	Poorly differentiated; Grade III	Left - origin of primary	Positive histology	I	T1c	N0	M0	Localized	51	Surgery performed	15	100	0	0	10	10	0	0	0	30	3	3	0	8	0	Positive	Positive	Not 2010+ Breast	Not 2010+ Breast		Alive or dead of other cause	Alive or dead due to cancer	66	Alive	1st of 2 or more primaries	No/Unknown	None/Unknown	No radiation and/or cancer-directed surgery	California excluding SF/SJM/LA - 2000+
Married (including common law)	79	2009	White	C50.1-Central portion of breast	Moderately differentiated; Grade II	Right - origin of primary	Positive histology	IIA	T1c	N1a	M0	Regional	41	Surgery performed	15	100	260	0	10	10	2	987	987	30	3	3	0	15	2	Positive	Positive	Not 2010+ Breast	Not 2010+ Breast		Alive or dead of other cause	Dead (attributable to causes other than this cancer dx)	11	Dead	1st of 2 or more primaries	No/Unknown	Beam radiation	Radiation after surgery	Kentucky - 2000+
Married (including common law)	76	2006	Unknown	C50.9-Breast, NOS	Moderately differentiated; Grade II	Right - origin of primary	Positive histology	UNK Stage	TX	N0	M0	Regional	0	Not recommended	999	300	0	0	10	10	98	0	0	0	1	0	0	0	98	Positive	Positive	Not 2010+ Breast	Not 2010+ Breast		Alive or dead of other cause	Dead (attributable to causes other than this cancer dx)	51	Dead	One primary only	No/Unknown	None/Unknown	No radiation and/or cancer-directed surgery	California excluding SF/SJM/LA - 2000+
Married (including common law)	77	2007	White	C50.0-Nipple	Moderately differentiated; Grade II	Left - origin of primary	Positive histology	IIA	T2	N0	M0	Localized	40	Surgery performed	35	100	0	0	10	10	0	0	0	20	3	3	0	3	0	Positive	Positive	Not 2010+ Breast	Not 2010+ Breast		Alive or dead of other cause	Alive or dead due to cancer	90	Alive	1st of 2 or more primaries	Yes	None/Unknown	No radiation and/or cancer-directed surgery	California excluding SF/SJM/LA - 2000+
Married (including common law)	78	2009	White	C50.4-Upper-outer quadrant of breast	Moderately differentiated; Grade II	Right - origin of primary	Positive histology	I	T1c	N0	M0	Localized	40	Surgery performed	18	100	0	0	998	998	0	0	0	0	3	3	0	1	0	Unknown	Unknown	Not 2010+ Breast	Not 2010+ Breast		N/A not first tumor	N/A not first tumor	66	Alive	2nd of 2 or more primaries	No/Unknown	None/Unknown	No radiation and/or cancer-directed surgery	Kentucky - 2000+
Married (including common law)	82	2013	White	C50.1-Central portion of breast	Moderately differentiated; Grade II	Right - origin of primary	Positive histology	I	T1c	N0(i-)	M0	Localized	41	Surgery performed	15	100	0	0	10	10	0	1	0	0	3	3	0	4	0	Positive	Positive	Negative	Her2-/HR+		N/A not first tumor	N/A not first tumor	18	Alive	3rd of 3 or more primaries	No/Unknown	None/Unknown	No radiation and/or cancer-directed surgery	California excluding SF/SJM/LA - 2000+
Married (including common law)	81	2012	White	C50.1-Central portion of breast	Moderately differentiated; Grade II	Right - origin of primary	Positive histology	I	T1c	N0(i-)	M0	Localized	41	Surgery performed	14	100	0	0	10	10	0	1	0	0	3	3	0	1	0	Positive	Positive	Negative	Her2-/HR+		N/A not first tumor	N/A not first tumor	30	Alive	2nd of 2 or more primaries	No/Unknown	None/Unknown	No radiation and/or cancer-directed surgery	California excluding SF/SJM/LA - 2000+
Married (including common law)	77	2008	White	C50.8-Overlapping lesion of breast	Well differentiated; Grade I	Left - origin of primary	Positive histology	I	T1a	N0	M0	Localized	41	Surgery performed	4	100	0	0	999	999	0	0	0	0	3	3	0	2	0	Unknown	Unknown	Not 2010+ Breast	Not 2010+ Breast		N/A not first tumor	N/A not first tumor	78	Alive	2nd of 2 or more primaries	No/Unknown	None/Unknown	No radiation and/or cancer-directed surgery	California excluding SF/SJM/LA - 2000+
Divorced	75	2005	White	C50.4-Upper-outer quadrant of breast	Poorly differentiated; Grade III	Left - origin of primary	Positive histology	0	Tis	N0	M0	Localized	51	Surgery performed	16	50	0	0	10	10	0	0	0	0	3	3	0	19	0	Positive	Positive	Not 2010+ Breast	Not 2010+ Breast		N/A not first tumor	N/A not first tumor	19	Dead	2nd of 2 or more primaries	No/Unknown	None/Unknown	No radiation and/or cancer-directed surgery	California excluding SF/SJM/LA - 2000+
Divorced	80	2010	White	C50.1-Central portion of breast	Poorly differentiated; Grade III	Left - origin of primary	Positive histology	IIB	T2	N1a	M0	Regional	51	Surgery performed	30	100	250	0	10	10	2	987	987	0	3	3	0	21	2	Positive	Positive	Negative	Her2-/HR+		Alive or dead of other cause	Alive or dead due to cancer	53	Alive	One primary only	No/Unknown	Beam radiation	Radiation after surgery	California excluding SF/SJM/LA - 2000+
Widowed	77	2008	White	C50.8-Overlapping lesion of breast	Poorly differentiated; Grade III	Right - origin of primary	Positive histology	I	T1c	N0	M0	Localized	0	Not recommended	17	100	0	0	20	20	98	0	0	0	1	0	0	0	98	Negative	Negative	Not 2010+ Breast	Not 2010+ Breast		Dead (attributable to this cancer dx)	Alive or dead due to cancer	6	Dead	One primary only	Yes	None/Unknown	No radiation and/or cancer-directed surgery	Louisiana - 2000+
Married (including common law)	82	2013	White	C50.0-Nipple	Moderately differentiated; Grade II	Right - origin of primary	Positive histology	I	T1c	N0(i-)	M0	Localized	41	Surgery performed	16	100	0	0	10	10	0	1	0	0	3	3	0	4	0	Positive	Positive	Negative	Her2-/HR+		Alive or dead of other cause	Alive or dead due to cancer	17	Alive	One primary only	No/Unknown	None/Unknown	No radiation and/or cancer-directed surgery	California excluding SF/SJM/LA - 2000+
Married (including common law)	81	2012	White	C50.8-Overlapping lesion of breast	Moderately differentiated; Grade II	Right - origin of primary	Positive histology	I	T1c	N0(i-)	M0	Localized	51	Surgery performed	16	100	0	0	10	10	0	1	0	20	3	3	0	4	0	Positive	Positive	Borderline	Unknown		Alive or dead of other cause	Alive or dead due to cancer	29	Alive	One primary only	No/Unknown	None/Unknown	No radiation and/or cancer-directed surgery	Los Angeles - 1992+
Married (including common law)	76	2007	White	C50.1-Central portion of breast	Moderately differentiated; Grade II	Left - origin of primary	Positive histology	IIA	T2	N0	M0	Localized	42	Surgery performed	22	100	0	0	10	10	0	0	0	0	3	3	0	4	0	Positive	Positive	Not 2010+ Breast	Not 2010+ Breast		Alive or dead of other cause	Alive or dead due to cancer	89	Alive	One primary only	No/Unknown	Beam radiation	Radiation after surgery	New Jersey - 2000+
Divorced	78	2008	Black	C50.0-Nipple	Well differentiated; Grade I	Right - origin of primary	Positive histology	I	T1c	N0(i-)	M0	Regional	51	Surgery performed	15	200	0	0	10	10	0	1	1	30	3	3	0	7	0	Positive	Positive	Not 2010+ Breast	Not 2010+ Breast		Alive or dead of other cause	Alive or dead due to cancer	77	Alive	One primary only	No/Unknown	None/Unknown	No radiation and/or cancer-directed surgery	Connecticut - 1973+
Divorced	82	2012	White	C50.8-Overlapping lesion of breast	Well differentiated; Grade I	Right - origin of primary	Positive histology	I	T1c	N0	M0	Localized	41	Surgery performed	14	100	0	0	10	20	98	0	0	0	3	0	0	0	98	Positive	Negative	Negative	Her2-/HR+		N/A not first tumor	N/A not first tumor	7	Dead	2nd of 2 or more primaries	No/Unknown	Beam radiation	Radiation before and after surgery	Connecticut - 1973+
Married (including common law)	76	2007	White	C50.4-Upper-outer quadrant of breast	Poorly differentiated; Grade III	Left - origin of primary	Positive histology	I	T1c	N0(i-)	M0	Localized	51	Surgery performed	20	100	0	0	10	10	0	1	0	20	3	3	0	7	0	Positive	Positive	Not 2010+ Breast	Not 2010+ Breast		N/A not first tumor	N/A not first tumor	57	Dead	3rd of 3 or more primaries	No/Unknown	None/Unknown	No radiation and/or cancer-directed surgery	Detroit (Metropolitan) - 1973+
Married (including common law)	79	2009	Black	C50.8-Overlapping lesion of breast	Poorly differentiated; Grade III	Left - origin of primary	Positive histology	IIB	T2	N1mi	M0	Regional	41	Surgery performed	26	200	130	0	10	10	5	987	987	0	3	3	0	17	5	Positive	Positive	Not 2010+ Breast	Not 2010+ Breast		Dead (attributable to this cancer dx)	Alive or dead due to cancer	20	Dead	One primary only	Yes	Beam radiation	Radiation after surgery	Atlanta (Metropolitan) - 1975+
Married (including common law)	78	2008	White	C50.1-Central portion of breast	Well differentiated; Grade I	Right - origin of primary	Positive histology	I	T1a	N0(i-)	M0	Localized	41	Surgery performed	4	100	0	0	10	20	0	1	0	20	3	3	0	1	0	Positive	Negative	Not 2010+ Breast	Not 2010+ Breast		N/A not first tumor	N/A not first tumor	73	Alive	2nd of 2 or more primaries	No/Unknown	None/Unknown	No radiation and/or cancer-directed surgery	Seattle (Puget Sound) - 1974+
Married (including common law)	83	2013	White	C50.8-Overlapping lesion of breast	Poorly differentiated; Grade III	Right - origin of primary	Positive histology	IIA	T2	N0	M0	Localized	41	Surgery performed	25	100	0	0	10	10	0	0	0	30	3	3	0	3	0	Positive	Positive	Negative	Her2-/HR+		Alive or dead of other cause	Alive or dead due to cancer	17	Alive	One primary only	No/Unknown	None/Unknown	No radiation and/or cancer-directed surgery	Seattle (Puget Sound) - 1974+
Married (including common law)	80	2010	White	C50.1-Central portion of breast	Poorly differentiated; Grade III	Right - origin of primary	Positive histology	IIA	T2	N0	M0	Regional	51	Surgery performed	25	200	0	0	10	10	0	0	0	0	3	3	0	15	0	Positive	Positive	Negative	Her2-/HR+		N/A not first tumor	N/A not first tumor	24	Dead	2nd of 2 or more primaries	No/Unknown	Beam radiation	Radiation after surgery	Connecticut - 1973+
Married (including common law)	73	2004	White	C50.1-Central portion of breast	Poorly differentiated; Grade III	Left - origin of primary	Positive histology	IV	T2	N0(i-)	M1	Distant	40	Surgery performed	35	200	0	44	10	20	0	1	1	0	3	3	0	12	0	Positive	Negative	Not 2010+ Breast	Not 2010+ Breast		Dead (attributable to this cancer dx)	Alive or dead due to cancer	26	Dead	One primary only	Yes	Beam radiation	Radiation after surgery	New Jersey - 2000+
Married (including common law)	76	2007	White	C50.1-Central portion of breast	Poorly differentiated; Grade III	Left - origin of primary	Positive histology	I	T1c	N0(i-)	M0	Localized	51	Surgery performed	20	100	0	0	10	20	0	1	0	50	3	3	0	98	0	Positive	Negative	Not 2010+ Breast	Not 2010+ Breast		Alive or dead of other cause	Alive or dead due to cancer	88	Alive	1st of 2 or more primaries	No/Unknown	None/Unknown	No radiation and/or cancer-directed surgery	California excluding SF/SJM/LA - 2000+
Married (including common law)	83	2013	Other (American Indian/AK Native, Asian/Pacific Islander)	C50.8-Overlapping lesion of breast	Moderately differentiated; Grade II	Left - origin of primary	Positive histology	IIIA	T1c	N2a	M0	Regional	41	Surgery performed	15	200	250	0	10	10	5	987	987	20	3	3	0	25	6	Positive	Positive	Negative	Her2-/HR+		Alive or dead of other cause	Alive or dead due to cancer	4	Alive	One primary only	No/Unknown	None/Unknown	No radiation and/or cancer-directed surgery	Los Angeles - 1992+
Unknown	76	2007	White	C50.9-Breast, NOS	Moderately differentiated; Grade II	Right - origin of primary	Positive histology	UNK Stage	TX	NX	M0	Unknown/unstaged	50	Surgery performed	999	999	999	0	999	999	98	987	987	987	9	9	0	0	98	Unknown	Unknown	Not 2010+ Breast	Not 2010+ Breast		Alive or dead of other cause	Dead (attributable to causes other than this cancer dx)	59	Dead	1st of 2 or more primaries	Yes	Beam radiation	Radiation after surgery	California excluding SF/SJM/LA - 2000+
Married (including common law)	78	2008	Other (American Indian/AK Native, Asian/Pacific Islander)	C50.1-Central portion of breast	Poorly differentiated; Grade III	Right - origin of primary	Positive histology	IIA	T1b	N1a	M0	Regional	41	Surgery performed	10	100	250	0	10	10	2	987	987	40	3	3	0	12	2	Positive	Positive	Not 2010+ Breast	Not 2010+ Breast		Alive or dead of other cause	Alive or dead due to cancer	73	Alive	One primary only	No/Unknown	None/Unknown	No radiation and/or cancer-directed surgery	California excluding SF/SJM/LA - 2000+
Married (including common law)	82	2012	White	C50.1-Central portion of breast	Moderately differentiated; Grade II	Right - origin of primary	Positive histology	IIIA	T3	N1NOS	M0	Regional	40	Surgery performed	22	190	260	0	10	10	98	987	987	20	3	3	0	2	1	Positive	Positive	Negative	Her2-/HR+		Alive or dead of other cause	Alive or dead due to cancer	21	Alive	One primary only	No/Unknown	None/Unknown	No radiation and/or cancer-directed surgery	New Jersey - 2000+
Married (including common law)	79	2009	White	C50.1-Central portion of breast	Poorly differentiated; Grade III	Left - origin of primary	Positive histology	I	T1c	N0(i-)	M0	Localized	24	Surgery performed	18	100	0	0	10	10	0	1	0	30	3	3	0	2	0	Positive	Positive	Not 2010+ Breast	Not 2010+ Breast		Alive or dead of other cause	Alive or dead due to cancer	63	Alive	One primary only	No/Unknown	None/Unknown	No radiation and/or cancer-directed surgery	Los Angeles - 1992+
Divorced	77	2007	White	C50.1-Central portion of breast	Unknown	Left - origin of primary	Positive histology	IIINOS	T4d	NX	M0	Regional	0	Recommended but not performed, unknown reason	100	710	999	0	999	999	98	987	987	0	1	0	0	0	98	Unknown	Unknown	Not 2010+ Breast	Not 2010+ Breast		Dead (attributable to this cancer dx)	Alive or dead due to cancer	12	Dead	One primary only	No/Unknown	None/Unknown	No radiation and/or cancer-directed surgery	Los Angeles - 1992+
Married (including common law)	76	2007	White	C50.8-Overlapping lesion of breast	Moderately differentiated; Grade II	Left - origin of primary	Positive histology	I	T1c	N0(mol-)	M0	Localized	24	Surgery performed	17	100	0	0	10	10	0	0	1	20	3	3	0	6	0	Positive	Positive	Not 2010+ Breast	Not 2010+ Breast		Alive or dead of other cause	Alive or dead due to cancer	87	Alive	One primary only	No/Unknown	None/Unknown	No radiation and/or cancer-directed surgery	New Jersey - 2000+
Unknown	80	2011	White	C50.1-Central portion of breast	Moderately differentiated; Grade II	Right - origin of primary	Positive histology	IIIA	T1c	N2a	M0	Regional	51	Surgery performed	19	100	520	0	10	10	4	987	987	20	3	3	0	9	4	Positive	Positive	Negative	Her2-/HR+		Alive or dead of other cause	Alive or dead due to cancer	39	Alive	One primary only	No/Unknown	None/Unknown	No radiation and/or cancer-directed surgery	San Jose-Monterey - 1992+
Married (including common law)	83	2013	White	C50.1-Central portion of breast	Moderately differentiated; Grade II	Left - origin of primary	Positive histology	IIA	T2	N0	M0	Regional	20	Surgery performed	23	200	0	0	10	10	98	0	0	30	3	0	0	0	98	Positive	Positive	Negative	Her2-/HR+		Alive or dead of other cause	Alive or dead due to cancer	15	Alive	One primary only	No/Unknown	None/Unknown	No radiation and/or cancer-directed surgery	San Francisco-Oakland SMSA - 1973+
Married (including common law)	74	2004	White	C50.4-Upper-outer quadrant of breast	Well differentiated; Grade I	Left - origin of primary	Positive histology	IIA	T1c	N1a	M0	Regional	50	Surgery performed	14	300	250	0	10	10	2	987	987	20	3	3	0	26	2	Positive	Positive	Not 2010+ Breast	Not 2010+ Breast		Alive or dead of other cause	Alive or dead due to cancer	123	Alive	One primary only	No/Unknown	Beam radiation	Radiation after surgery	Connecticut - 1973+
Unknown	78	2008	White	C50.1-Central portion of breast	Moderately differentiated; Grade II	Right - origin of primary	Positive histology	UNK Stage	TX	NX	MX	Unknown/unstaged	99	Unknown; death certificate; or autopsy only (2003+)	999	999	999	99	10	10	99	987	987	60	9	9	9	99	99	Positive	Positive	Not 2010+ Breast	Not 2010+ Breast		Dead (attributable to this cancer dx)	Alive or dead due to cancer	18	Dead	One primary only	No/Unknown	None/Unknown	No radiation and/or cancer-directed surgery	Hawaii - 1973+
Married (including common law)	82	2013	White	C50.4-Upper-outer quadrant of breast	Well differentiated; Grade I	Right - origin of primary	Positive histology	I	T1c	N0	M0	Localized	40	Surgery performed	12	100	0	0	10	10	0	0	0	0	3	3	0	16	0	Positive	Positive	Negative	Her2-/HR+		Alive or dead of other cause	Alive or dead due to cancer	14	Alive	One primary only	No/Unknown	None/Unknown	No radiation and/or cancer-directed surgery	San Francisco-Oakland SMSA - 1973+
Single (never married)	74	2004	White	C50.1-Central portion of breast	Poorly differentiated; Grade III	Left - origin of primary	Positive histology	IV	T2	N1NOS	M1	Distant	51	Surgery performed	45	200	520	44	10	10	97	987	987	0	3	3	3	98	97	Positive	Positive	Not 2010+ Breast	Not 2010+ Breast		Alive or dead of other cause	Dead (attributable to causes other than this cancer dx)	4	Dead	One primary only	No/Unknown	None/Unknown	No radiation and/or cancer-directed surgery	Utah - 1973+
Widowed	83	2013	Black	C50.8-Overlapping lesion of breast	Poorly differentiated; Grade III	Left - origin of primary	Positive histology	IIB	T3	N0(i+)	M0	Regional	51	Surgery performed	65	200	0	0	10	10	0	2	0	0	3	3	0	2	0	Positive	Positive	Negative	Her2-/HR+		N/A not first tumor	N/A not first tumor	14	Alive	2nd of 2 or more primaries	No/Unknown	Beam radiation	Radiation after surgery	Detroit (Metropolitan) - 1973+
Divorced	77	2007	White	C50.2-Upper-inner quadrant of breast	Moderately differentiated; Grade II	Right - origin of primary	Positive histology	I	T1b	N0	M0	Localized	51	Surgery performed	10	100	0	0	10	10	0	0	0	0	3	3	0	15	0	Positive	Positive	Not 2010+ Breast	Not 2010+ Breast		Alive or dead of other cause	Dead (attributable to causes other than this cancer dx)	62	Dead	One primary only	No/Unknown	None/Unknown	No radiation and/or cancer-directed surgery	Detroit (Metropolitan) - 1973+
Divorced	80	2010	Black	C50.2-Upper-inner quadrant of breast	Moderately differentiated; Grade II	Right - origin of primary	Positive histology	IIA	T2	N0	M0	Localized	51	Surgery performed	50	100	0	0	10	10	0	0	0	0	3	3	0	22	0	Positive	Positive	Negative	Her2-/HR+		Alive or dead of other cause	Alive or dead due to cancer	50	Alive	One primary only	No/Unknown	Beam radiation	Radiation after surgery	Detroit (Metropolitan) - 1973+
Married (including common law)	78	2008	White	C50.8-Overlapping lesion of breast	Moderately differentiated; Grade II	Left - origin of primary	Positive histology	I	T1c	N0	M0	Localized	51	Surgery performed	18	100	0	0	999	999	0	0	0	0	3	3	0	14	0	Unknown	Unknown	Not 2010+ Breast	Not 2010+ Breast		Alive or dead of other cause	Dead (attributable to causes other than this cancer dx)	50	Dead	1st of 2 or more primaries	No/Unknown	None/Unknown	No radiation and/or cancer-directed surgery	California excluding SF/SJM/LA - 2000+
Married (including common law)	74	2004	White	C50.1-Central portion of breast	Poorly differentiated; Grade III	Left - origin of primary	Positive histology	IIA	T2	N0(i-)	M0	Localized	41	Surgery performed	40	100	0	0	10	10	0	1	0	0	3	3	0	6	0	Positive	Positive	Not 2010+ Breast	Not 2010+ Breast		Alive or dead of other cause	Dead (attributable to causes other than this cancer dx)	50	Dead	One primary only	No/Unknown	Refused	No radiation and/or cancer-directed surgery	California excluding SF/SJM/LA - 2000+
Divorced	80	2011	White	C50.9-Breast, NOS	Poorly differentiated; Grade III	Right - origin of primary	Positive histology	IIIC	T4b	N3a	M0	Regional	51	Surgery performed	60	512	250	0	10	10	17	987	987	20	3	3	0	36	17	Positive	Positive	Negative	Her2-/HR+		N/A not first tumor	N/A not first tumor	25	Dead	3rd of 3 or more primaries	No/Unknown	Beam radiation	Radiation after surgery	California excluding SF/SJM/LA - 2000+
Married (including common law)	76	2006	White	C50.5-Lower-outer quadrant of breast	Unknown	Left - origin of primary	Positive histology	IIA	T2	N0(i-)	M0	Localized	41	Surgery performed	24	100	0	0	10	10	0	1	0	0	3	3	0	3	0	Positive	Positive	Not 2010+ Breast	Not 2010+ Breast		Alive or dead of other cause	Alive or dead due to cancer	96	Alive	One primary only	No/Unknown	None/Unknown	No radiation and/or cancer-directed surgery	New Jersey - 2000+
Single (never married)	75	2006	White	C50.1-Central portion of breast	Poorly differentiated; Grade III	Left - origin of primary	Positive histology	IIB	T2	N1a	M0	Regional	41	Surgery performed	38	100	250	0	10	10	1	987	987	0	3	3	0	3	1	Positive	Positive	Not 2010+ Breast	Not 2010+ Breast		N/A not first tumor	N/A not first tumor	40	Dead	2nd of 2 or more primaries	No/Unknown	Beam radiation	Radiation after surgery	New Jersey - 2000+
Married (including common law)	77	2007	White	C50.9-Breast, NOS	Poorly differentiated; Grade III	Right - origin of primary	Positive histology	IIA	T2	N0	M0	Localized	61	Surgery performed	45	100	0	0	10	10	98	0	0	0	3	0	0	0	98	Positive	Positive	Not 2010+ Breast	Not 2010+ Breast		Dead (attributable to this cancer dx)	Alive or dead due to cancer	27	Dead	One primary only	No/Unknown	None/Unknown	No radiation and/or cancer-directed surgery	California excluding SF/SJM/LA - 2000+
Widowed	75	2005	White	C50.0-Nipple	Moderately differentiated; Grade II	Right - origin of primary	Positive histology	IV	T4b	N3a	M1	Distant	51	Surgery performed	35	510	520	44	10	20	14	987	987	0	3	3	0	17	14	Positive	Negative	Not 2010+ Breast	Not 2010+ Breast		Dead (attributable to this cancer dx)	Alive or dead due to cancer	22	Dead	One primary only	No/Unknown	Beam radiation	Radiation after surgery	Kentucky - 2000+
Married (including common law)	82	2012	Unknown	C50.9-Breast, NOS	Poorly differentiated; Grade III	Left - origin of primary	Positive histology	IIA	T2	N0	M0	Localized	40	Surgery performed	30	100	0	0	10	10	0	0	0	20	3	3	0	1	0	Positive	Positive	Negative	Her2-/HR+		Alive or dead of other cause	Alive or dead due to cancer	25	Alive	One primary only	No/Unknown	None/Unknown	No radiation and/or cancer-directed surgery	California excluding SF/SJM/LA - 2000+
Divorced	81	2011	White	C50.8-Overlapping lesion of breast	Well differentiated; Grade I	Right - origin of primary	Positive histology	I	T1c	N0(i-)	M0	Regional	40	Surgery performed	20	200	0	0	10	10	0	1	0	20	3	3	0	3	0	Positive	Positive	Negative	Her2-/HR+		Alive or dead of other cause	Alive or dead due to cancer	37	Alive	One primary only	No/Unknown	None/Unknown	No radiation and/or cancer-directed surgery	Los Angeles - 1992+
Married (including common law)	75	2006	White	C50.1-Central portion of breast	Well differentiated; Grade I	Left - origin of primary	Positive histology	IIB	T2	N1a	M0	Regional	51	Surgery performed	35	200	250	0	10	10	2	987	987	30	3	3	0	12	2	Positive	Positive	Not 2010+ Breast	Not 2010+ Breast		Dead (attributable to this cancer dx)	Alive or dead due to cancer	82	Dead	One primary only	No/Unknown	None/Unknown	No radiation and/or cancer-directed surgery	Los Angeles - 1992+
Married (including common law)	79	2009	White	C50.0-Nipple	Moderately differentiated; Grade II	Left - origin of primary	Positive histology	I	T1c	N0(i-)	M0	Localized	20	Surgery performed	20	100	0	0	10	10	0	1	0	0	3	3	0	3	0	Positive	Positive	Not 2010+ Breast	Not 2010+ Breast		Dead (attributable to this cancer dx)	Alive or dead due to cancer	34	Dead	1st of 2 or more primaries	No/Unknown	None/Unknown	No radiation and/or cancer-directed surgery	Connecticut - 1973+
Married (including common law)	77	2007	White	C50.9-Breast, NOS	Moderately differentiated; Grade II	Right - origin of primary	Positive histology	IIA	T1c	N1a	M0	Regional	51	Surgery performed	16	200	250	0	10	10	2	987	987	30	Blank(s)	Blank(s)	Blank(s)	5	2	Positive	Positive	Not 2010+ Breast	Not 2010+ Breast		Alive or dead of other cause	Dead (attributable to causes other than this cancer dx)	3	Dead	One primary only	No/Unknown	Beam radiation	Radiation after surgery	Seattle (Puget Sound) - 1974+
Married (including common law)	78	2008	White	C50.4-Upper-outer quadrant of breast	Well differentiated; Grade I	Right - origin of primary	Positive histology	I	T1c	N0(i-)	M0	Localized	42	Surgery performed	13	100	0	0	10	10	0	1	0	0	3	3	0	6	0	Positive	Positive	Not 2010+ Breast	Not 2010+ Breast		Alive or dead of other cause	Alive or dead due to cancer	73	Alive	One primary only	No/Unknown	None/Unknown	No radiation and/or cancer-directed surgery	Seattle (Puget Sound) - 1974+
Married (including common law)	78	2008	White	C50.4-Upper-outer quadrant of breast	Poorly differentiated; Grade III	Right - origin of primary	Positive histology	IV	T2	N0(i-)	M1	Distant	41	Surgery performed	35	100	0	40	10	20	0	1	0	0	3	3	0	3	0	Positive	Negative	Not 2010+ Breast	Not 2010+ Breast		N/A not first tumor	N/A not first tumor	19	Dead	2nd of 2 or more primaries	No/Unknown	None/Unknown	No radiation and/or cancer-directed surgery	Greater Georgia - 2000+
Married (including common law)	77	2007	White	C50.1-Central portion of breast	Poorly differentiated; Grade III	Left - origin of primary	Positive histology	I	T1c	N0(i-)	M0	Localized	51	Surgery performed	15	100	0	0	10	10	0	1	1	20	3	3	3	8	0	Positive	Positive	Not 2010+ Breast	Not 2010+ Breast		Alive or dead of other cause	Alive or dead due to cancer	85	Alive	One primary only	No/Unknown	None/Unknown	No radiation and/or cancer-directed surgery	Greater Georgia - 2000+
Married (including common law)	83	2013	White	C50.1-Central portion of breast	Moderately differentiated; Grade II	Left - origin of primary	Positive histology	I	T1c	N0	M0	Localized	41	Surgery performed	16	100	0	0	10	20	0	0	0	20	3	3	0	1	0	Positive	Negative	Negative	Her2-/HR+		N/A not first tumor	N/A not first tumor	12	Alive	2nd of 2 or more primaries	No/Unknown	None/Unknown	No radiation and/or cancer-directed surgery	California excluding SF/SJM/LA - 2000+
Married (including common law)	74	2005	White	C50.0-Nipple	Moderately differentiated; Grade II	Left - origin of primary	Positive histology	I	T1c	N0	M0	Localized	41	Surgery performed	20	100	0	0	10	10	0	0	0	20	3	3	0	6	0	Positive	Positive	Not 2010+ Breast	Not 2010+ Breast		N/A not first tumor	N/A not first tumor	108	Alive	4th of 4 or more primaries	No/Unknown	None/Unknown	No radiation and/or cancer-directed surgery	San Francisco-Oakland SMSA - 1973+
Married (including common law)	75	2005	White	C50.1-Central portion of breast	Moderately differentiated; Grade II	Right - origin of primary	Positive histology	I	T1c	N0	M0	Localized	51	Surgery performed	13	100	0	0	10	10	0	0	0	20	3	3	0	19	0	Positive	Positive	Not 2010+ Breast	Not 2010+ Breast		N/A not first tumor	N/A not first tumor	68	Dead	2nd of 2 or more primaries	No/Unknown	None/Unknown	No radiation and/or cancer-directed surgery	Atlanta (Metropolitan) - 1975+
Married (including common law)	81	2011	Black	C50.9-Breast, NOS	Well differentiated; Grade I	Right - origin of primary	Positive histology	I	T1b	N0	M0	Localized	41	Surgery performed	8	100	0	0	10	10	98	0	0	20	3	0	0	0	98	Positive	Positive	Negative	Her2-/HR+		N/A not first tumor	N/A not first tumor	36	Alive	2nd of 2 or more primaries	No/Unknown	None/Unknown	No radiation and/or cancer-directed surgery	Seattle (Puget Sound) - 1974+
Married (including common law)	73	2005	White	C50.1-Central portion of breast	Moderately differentiated; Grade II	Right - origin of primary	Positive histology	IIA	T1b	N1a	M0	Regional	51	Surgery performed	10	100	250	0	10	10	2	987	987	20	3	3	3	16	2	Positive	Positive	Not 2010+ Breast	Not 2010+ Breast		Alive or dead of other cause	Alive or dead due to cancer	118	Alive	One primary only	No/Unknown	None/Unknown	No radiation and/or cancer-directed surgery	Connecticut - 1973+
Married (including common law)	73	2005	White	C50.9-Breast, NOS	Unknown	Left - origin of primary	Positive histology	UNK Stage	TX	N0	M0	Localized	41	Surgery performed	999	100	0	0	998	998	0	0	0	0	3	3	0	6	0	Unknown	Unknown	Not 2010+ Breast	Not 2010+ Breast		Alive or dead of other cause	Dead (attributable to causes other than this cancer dx)	98	Dead	One primary only	No/Unknown	None/Unknown	No radiation and/or cancer-directed surgery	Connecticut - 1973+
Married (including common law)	78	2010	White	C50.4-Upper-outer quadrant of breast	Moderately differentiated; Grade II	Left - origin of primary	Positive histology	I	T1c	N0	M0	Localized	51	Surgery performed	15	100	0	0	10	10	0	0	0	20	3	3	0	8	0	Positive	Positive	Negative	Her2-/HR+		Alive or dead of other cause	Alive or dead due to cancer	59	Alive	One primary only	No/Unknown	None/Unknown	No radiation and/or cancer-directed surgery	California excluding SF/SJM/LA - 2000+
Divorced	81	2013	White	C50.9-Breast, NOS	Moderately differentiated; Grade II	Right - origin of primary	Positive histology	IIA	T2	N0	M0	Localized	41	Surgery performed	21	100	0	0	997	997	0	0	0	0	3	3	0	10	0	Unknown	Unknown	Unknown	Unknown		N/A not first tumor	N/A not first tumor	9	Dead	3rd of 3 or more primaries	No/Unknown	None/Unknown	No radiation and/or cancer-directed surgery	Kentucky - 2000+
Married (including common law)	78	2010	White	C50.1-Central portion of breast	Poorly differentiated; Grade III	Right - origin of primary	Positive histology	IIB	T2	N1a	M0	Regional	41	Surgery performed	30	100	250	0	10	10	2	987	987	20	3	3	0	8	2	Positive	Positive	Negative	Her2-/HR+		N/A not first tumor	N/A not first tumor	27	Dead	2nd of 2 or more primaries	No/Unknown	None/Unknown	No radiation and/or cancer-directed surgery	California excluding SF/SJM/LA - 2000+
Married (including common law)	80	2012	White	C50.1-Central portion of breast	Poorly differentiated; Grade III	Left - origin of primary	Positive histology	IIB	T2	N1a	M0	Regional	41	Surgery performed	32	100	250	0	10	10	2	987	987	20	3	3	0	2	2	Positive	Positive	Negative	Her2-/HR+		N/A not first tumor	N/A not first tumor	35	Alive	3rd of 3 or more primaries	No/Unknown	Beam radiation	Radiation after surgery	California excluding SF/SJM/LA - 2000+
Married (including common law)	80	2012	White	C50.1-Central portion of breast	Moderately differentiated; Grade II	Left - origin of primary	Positive histology	IIIB	T4NOS	N0(i-)	M0	Regional	51	Surgery performed	18	790	0	0	10	10	0	1	0	20	3	3	0	18	0	Positive	Positive	Negative	Her2-/HR+		Alive or dead of other cause	Alive or dead due to cancer	16	Alive	One primary only	No/Unknown	None/Unknown	No radiation and/or cancer-directed surgery	Los Angeles - 1992+
Married (including common law)	79	2011	White	C50.9-Breast, NOS	Moderately differentiated; Grade II	Right - origin of primary	Positive histology	IIIB	T4a	N2a	M0	Regional	90	Surgery performed	35	400	250	0	10	10	6	987	987	0	3	3	0	11	6	Positive	Positive	Unknown	Unknown		N/A not first tumor	N/A not first tumor	47	Alive	2nd of 2 or more primaries	No/Unknown	None/Unknown	No radiation and/or cancer-directed surgery	Los Angeles - 1992+
Widowed	79	2011	White	C50.9-Breast, NOS	Moderately differentiated; Grade II	Right - origin of primary	Positive histology	UNK Stage	TX	N0	M0	Localized	51	Surgery performed	999	100	0	0	10	10	0	0	0	0	3	3	0	4	0	Positive	Positive	Negative	Her2-/HR+		Alive or dead of other cause	Alive or dead due to cancer	46	Alive	One primary only	No/Unknown	None/Unknown	No radiation and/or cancer-directed surgery	Los Angeles - 1992+
Married (including common law)	73	2005	White	C50.9-Breast, NOS	Poorly differentiated; Grade III	Right - origin of primary	Positive histology	IV	T1c	N0	M1	Distant	41	Surgery performed	14	200	0	40	10	20	0	0	0	0	3	3	0	2	0	Positive	Negative	Not 2010+ Breast	Not 2010+ Breast		Dead (attributable to this cancer dx)	Alive or dead due to cancer	2	Dead	One primary only	No/Unknown	None/Unknown	No radiation and/or cancer-directed surgery	Louisiana - 2000+
Married (including common law)	79	2011	Black	C50.8-Overlapping lesion of breast	Moderately differentiated; Grade II	Right - origin of primary	Positive histology	IIA	T1c	N1mi	M0	Regional	41	Surgery performed	15	100	150	0	10	10	2	987	987	0	3	3	0	5	2	Positive	Positive	Negative	Her2-/HR+		Alive or dead of other cause	Alive or dead due to cancer	46	Alive	One primary only	No/Unknown	None/Unknown	No radiation and/or cancer-directed surgery	Detroit (Metropolitan) - 1973+
Widowed	79	2011	White	C50.4-Upper-outer quadrant of breast	Poorly differentiated; Grade III	Right - origin of primary	Positive histology	IIIB	T4b	N1mi	M0	Regional	40	Surgery performed	1	580	150	0	10	10	1	987	987	20	3	3	0	5	1	Positive	Positive	Negative	Her2-/HR+		N/A not first tumor	N/A not first tumor	46	Alive	5th of 5 or more primaries	No/Unknown	Beam radiation	Radiation after surgery	Los Angeles - 1992+
Divorced	75	2007	White	C50.9-Breast, NOS	Moderately differentiated; Grade II	Left - origin of primary	Positive histology	I	T1c	N0	M0	Regional	50	Surgery performed	14	200	0	0	997	997	0	0	0	50	3	3	0	8	0	Unknown	Unknown	Not 2010+ Breast	Not 2010+ Breast		Alive or dead of other cause	Alive or dead due to cancer	94	Alive	One primary only	No/Unknown	None/Unknown	No radiation and/or cancer-directed surgery	Detroit (Metropolitan) - 1973+
Widowed	79	2011	White	C50.1-Central portion of breast	Moderately differentiated; Grade II	Right - origin of primary	Positive histology	I	T1c	N0(i-)	M0	Localized	41	Surgery performed	15	100	0	0	10	10	0	1	0	0	3	3	0	2	0	Positive	Positive	Negative	Her2-/HR+		Alive or dead of other cause	Dead (attributable to causes other than this cancer dx)	42	Dead	One primary only	No/Unknown	None/Unknown	No radiation and/or cancer-directed surgery	Connecticut - 1973+
Widowed	75	2007	White	C50.1-Central portion of breast	Moderately differentiated; Grade II	Right - origin of primary	Positive histology	IIA	T2	N0(i-)	M0	Localized	41	Surgery performed	25	100	0	0	10	10	0	1	0	0	Blank(s)	Blank(s)	Blank(s)	2	0	Positive	Positive	Not 2010+ Breast	Not 2010+ Breast		N/A not first tumor	N/A not first tumor	46	Dead	2nd of 2 or more primaries	No/Unknown	None/Unknown	No radiation and/or cancer-directed surgery	Seattle (Puget Sound) - 1974+
Married (including common law)	72	2004	White	C50.1-Central portion of breast	Moderately differentiated; Grade II	Left - origin of primary	Positive histology	IIA	T2	N0	M0	Localized	41	Surgery performed	25	100	0	0	998	998	0	0	0	0	3	3	0	24	0	Unknown	Unknown	Not 2010+ Breast	Not 2010+ Breast		Alive or dead of other cause	Alive or dead due to cancer	129	Alive	One primary only	Yes	None/Unknown	No radiation and/or cancer-directed surgery	New Jersey - 2000+
Widowed	77	2008	White	C50.1-Central portion of breast	Moderately differentiated; Grade II	Right - origin of primary	Positive histology	IIA	T1c	N1a	M0	Regional	22	Surgery performed	20	100	260	0	10	10	1	987	987	0	3	3	0	12	1	Positive	Positive	Not 2010+ Breast	Not 2010+ Breast		Alive or dead of other cause	Alive or dead due to cancer	80	Alive	One primary only	No/Unknown	None/Unknown	No radiation and/or cancer-directed surgery	New Jersey - 2000+
Widowed	73	2005	White	C50.1-Central portion of breast	Moderately differentiated; Grade II	Left - origin of primary	Positive histology	IIA	T1c	N1a	M0	Regional	51	Surgery performed	15	100	250	0	10	10	1	987	987	0	3	3	0	14	1	Positive	Positive	Not 2010+ Breast	Not 2010+ Breast		Dead (attributable to this cancer dx)	Alive or dead due to cancer	59	Dead	One primary only	No/Unknown	None/Unknown	No radiation and/or cancer-directed surgery	New Jersey - 2000+
Married (including common law)	75	2006	White	C50.1-Central portion of breast	Poorly differentiated; Grade III	Right - origin of primary	Positive histology	IIA	T2	N0	M0	Localized	51	Surgery performed	22	100	0	0	10	10	0	0	0	0	3	3	0	8	0	Positive	Positive	Not 2010+ Breast	Not 2010+ Breast		N/A not first tumor	N/A not first tumor	104	Alive	2nd of 2 or more primaries	No/Unknown	Beam radiation	Radiation after surgery	California excluding SF/SJM/LA - 2000+
Married (including common law)	77	2008	White	C50.8-Overlapping lesion of breast	Well differentiated; Grade I	Left - origin of primary	Positive histology	I	T1a	N0(i-)	M0	Localized	41	Surgery performed	4	100	0	0	10	10	0	1	0	20	3	3	0	11	0	Positive	Positive	Not 2010+ Breast	Not 2010+ Breast		Alive or dead of other cause	Alive or dead due to cancer	80	Alive	One primary only	No/Unknown	None/Unknown	No radiation and/or cancer-directed surgery	Los Angeles - 1992+
Married (including common law)	81	2013	White	C50.4-Upper-outer quadrant of breast	Well differentiated; Grade I	Left - origin of primary	Positive histology	IIA	T2	N0	M0	Regional	22	Surgery performed	25	300	0	0	10	10	0	0	0	0	3	3	0	15	0	Positive	Positive	Negative	Her2-/HR+		N/A not first tumor	N/A not first tumor	20	Alive	2nd of 2 or more primaries	No/Unknown	None/Unknown	No radiation and/or cancer-directed surgery	Los Angeles - 1992+
Married (including common law)	76	2008	White	C50.1-Central portion of breast	Poorly differentiated; Grade III	Left - origin of primary	Positive histology	I	T1c	N0	M0	Localized	41	Surgery performed	15	100	0	0	10	10	98	0	0	0	3	3	0	1	0	Positive	Positive	Not 2010+ Breast	Not 2010+ Breast		Alive or dead of other cause	Alive or dead due to cancer	80	Alive	One primary only	No/Unknown	None/Unknown	No radiation and/or cancer-directed surgery	Connecticut - 1973+
[truncated: 2,630 more rows]
